# Supplementary material for: Assessing the efficacy, safety and utility of 6-month day-and-night automated closed-loop insulin delivery under free-living conditions compared with insulin pump therapy in children and adolescents with type 1 diabetes: an open-label, multicentre, multinational, single-period, randomised, parallel group study protocol
Source: PubMed Central journal article supplement (PMC6561428; doi:10.1136/bmjopen-2018-027856), 2019-06-03
Supplement: bmjopen-2018-027856.draft_revisions.pdf [file bmjopen-2018-027856.draft_revisions.pdf]

# BMJ Open

BMJ Open is committed to open peer review. As part of this commitment we make the peer review history of every article we publish publicly available.

When an article is published we post the peer reviewers' comments and the authors' responses online. We also post the versions of the paper that were used during peer review. These are the versions that the peer review comments apply to.

The versions of the paper that follow are the versions that were submitted during the peer review process. They are not the versions of record or the final published versions. They should not be cited or distributed as the published version of this manuscript.

BMJ Open is an open access journal and the full, final, typeset and author-corrected version of record of the manuscript is available on our site with no access controls, subscription charges or pay-per-view fees (<http://bmjopen.bmj.com>).

If you have any questions on BMJ Open's open peer review process please email [info.bmjopen@bmj.com](mailto:info.bmjopen@bmj.com)

# BMJ Open

**Assessing the efficacy, safety and utility of 6 month day-and-night automated closed-loop insulin delivery under free living conditions compared to insulin pump therapy in children and adolescents with type 1 diabetes: a randomised parallel study protocol**

|                               |                                                                                                                                                                                                                                                                                                                                                                                                                                                                                                                                                                                                                                                                                                                                                                                                                                                                                                                                                                                                                                                                                                                                                                                                                                                                                                                                                                                                                                                                                                                                                                                                                                                                                                                                                                                                                                                                                                                                                                                                                                                                 |
|-------------------------------|-----------------------------------------------------------------------------------------------------------------------------------------------------------------------------------------------------------------------------------------------------------------------------------------------------------------------------------------------------------------------------------------------------------------------------------------------------------------------------------------------------------------------------------------------------------------------------------------------------------------------------------------------------------------------------------------------------------------------------------------------------------------------------------------------------------------------------------------------------------------------------------------------------------------------------------------------------------------------------------------------------------------------------------------------------------------------------------------------------------------------------------------------------------------------------------------------------------------------------------------------------------------------------------------------------------------------------------------------------------------------------------------------------------------------------------------------------------------------------------------------------------------------------------------------------------------------------------------------------------------------------------------------------------------------------------------------------------------------------------------------------------------------------------------------------------------------------------------------------------------------------------------------------------------------------------------------------------------------------------------------------------------------------------------------------------------|
| Journal:                      | <i>BMJ Open</i>                                                                                                                                                                                                                                                                                                                                                                                                                                                                                                                                                                                                                                                                                                                                                                                                                                                                                                                                                                                                                                                                                                                                                                                                                                                                                                                                                                                                                                                                                                                                                                                                                                                                                                                                                                                                                                                                                                                                                                                                                                                 |
| Manuscript ID                 | bmjopen-2018-027856                                                                                                                                                                                                                                                                                                                                                                                                                                                                                                                                                                                                                                                                                                                                                                                                                                                                                                                                                                                                                                                                                                                                                                                                                                                                                                                                                                                                                                                                                                                                                                                                                                                                                                                                                                                                                                                                                                                                                                                                                                             |
| Article Type:                 | Protocol                                                                                                                                                                                                                                                                                                                                                                                                                                                                                                                                                                                                                                                                                                                                                                                                                                                                                                                                                                                                                                                                                                                                                                                                                                                                                                                                                                                                                                                                                                                                                                                                                                                                                                                                                                                                                                                                                                                                                                                                                                                        |
| Date Submitted by the Author: | 18-Nov-2018                                                                                                                                                                                                                                                                                                                                                                                                                                                                                                                                                                                                                                                                                                                                                                                                                                                                                                                                                                                                                                                                                                                                                                                                                                                                                                                                                                                                                                                                                                                                                                                                                                                                                                                                                                                                                                                                                                                                                                                                                                                     |
| Complete List of Authors:     | <p>Musolino, Gianluca; Wellcome Trust-MRC Institute of Metabolic Science, University of Cambridge; University of Cambridge, Department of Paediatrics</p> <p>Allen, Janet; Wellcome Trust-MRC Institute of Metabolic Science, University of Cambridge ; University of Cambridge, Department of Paediatrics</p> <p>Hartnell, Sara; Cambridge University Hospitals NHS Foundation Trust, Department of Diabetes and Endocrinology</p> <p>Wilinska, Malgorzata; Wellcome Trust-MRC Institute of Metabolic Science, University of Cambridge ; University of Cambridge, Department of Paediatrics</p> <p>Tauschmann, Martin; Wellcome Trust-MRC Institute of Metabolic Science, University of Cambridge; Medical University of Vienna, Department of Pediatrics and Adolescent Medicine</p> <p>Boughton, Charlotte; Wellcome Trust-MRC Institute of Metabolic Science, University of Cambridge</p> <p>Campbell, Fiona; Leeds Children's Hospital, Department of Paediatric Diabetes</p> <p>Denvir, Louise; Nottingham University Hospitals NHS Trust, Department of Paediatric Diabetes and Endocrinology</p> <p>Trevelyan, Nicola; Southampton Children's Hospital, Southampton General Hospital</p> <p>Wadwa, Paul; Barbara Davis Center for Childhood Diabetes, University of Colorado</p> <p>DiMeglio, Linda; Indiana University School of Medicine, Division of Pediatric Endocrinology and Diabetology and Wells Center for Pediatric Research, Department of Pediatrics</p> <p>Buckingham, Bruce A.; Stanford University, Division of Pediatric Endocrinology</p> <p>Weinzimer, Stuart; Yale University, Department of Pediatrics</p> <p>Acerini, Carlo; Wellcome Trust-MRC Institute of Metabolic Science, University of Cambridge ; University of Cambridge, Department of Paediatrics</p> <p>Hood, Korey; Stanford University, Division of Pediatric Endocrinology</p> <p>Fox, Steven; University of Southern California, Department of Pharmaceutical and Health Economics, School of Pharmacy</p> <p>Kollman, Craig; Jaeb Center for Health Research</p> |

1  
2  
3  
4  
5  
6  
7  
8  
9  
10  
11  
12  
13  
14  
15  
16  
17  
18  
19  
20  
21  
22  
23  
24  
25  
26  
27  
28  
29  
30  
31  
32  
33  
34  
35  
36  
37  
38  
39  
40  
41  
42  
43  
44  
45  
46  
47  
48  
49  
50  
51  
52  
53  
54  
55  
56  
57  
58  
59  
60

|           |                                                                                                                                                                                                                                                                                                              |
|-----------|--------------------------------------------------------------------------------------------------------------------------------------------------------------------------------------------------------------------------------------------------------------------------------------------------------------|
|           | Sibayan, Judy; Jaeb Center for Health Research<br>Borgman, Sarah; Jaeb Center for Health Research<br>Cheng, Peiyao; Jaeb Center for Health Research<br>Hovorka, Roman; Wellcome Trust-MRC Institute of Metabolic Science,<br>University of Cambridge ; University of Cambridge, Department of<br>Paediatrics |
| Keywords: | Type 1 diabetes, Closed-loop, Artificial pancreas                                                                                                                                                                                                                                                            |
|           |                                                                                                                                                                                                                                                                                                              |

SCHOLARONE™  
Manuscripts

1  
2  
3 **Assessing the efficacy, safety and utility of 6 month day-and-night automated closed-**  
4 **loop insulin delivery under free living conditions compared to insulin pump therapy in**  
5 **children and adolescents with type 1 diabetes: a randomised parallel study protocol.**  
6

7 <sup>1,3</sup>Musolino G, <sup>1,3</sup>Allen JM, <sup>2</sup>Hartnell S, <sup>1,3</sup>Wilinska ME, <sup>1,4</sup>Tauschmann M, <sup>1</sup>Boughton C,  
8 <sup>5</sup>Campbell F, <sup>6</sup>Denvir L, <sup>7</sup>Trevelyan N, <sup>8</sup>Wadwa RP, <sup>9</sup>DiMeglio LA, <sup>10</sup>Buckingham BA,  
9 <sup>11</sup>Weinzimer SA, <sup>1,3</sup>Acerini CL, <sup>10</sup>Hood KK, <sup>12</sup>Fox DS, <sup>13</sup>Kollman C, <sup>13</sup>Sibayan J, <sup>13</sup>Borgman S,  
10 <sup>13</sup>Cheng P, and <sup>1,3</sup>Hovorka R on behalf of DAN05 Consortium  
11  
12  
13  
14

15 <sup>1</sup>Wellcome Trust-MRC Institute of Metabolic Science, University of Cambridge, Cambridge, UK

16 <sup>2</sup>Department of Diabetes & Endocrinology, Cambridge University Hospitals NHS Foundation Trust,  
17 Cambridge, UK

18 <sup>3</sup>Department of Paediatrics, University of Cambridge, Cambridge, UK

19 <sup>4</sup>Department of Pediatrics and Adolescent Medicine, Medical University of Vienna, Austria

20 <sup>5</sup>Leeds Children's Hospital, Department of Paediatric Diabetes, Leeds, UK

21 <sup>6</sup>Department of Paediatric Diabetes and Endocrinology, Nottingham University Hospitals NHS Trust,  
22 Nottingham, UK

23 <sup>7</sup>Southampton Children's Hospital, Southampton General Hospital, Southampton, UK

24 <sup>8</sup>Barbara Davis Center for Childhood Diabetes, University of Colorado, Aurora, CO, USA

25 <sup>9</sup>Division of Pediatric Endocrinology and Diabetology and Wells Center for Pediatric Research,  
26 Department of Pediatrics, Indiana University School of Medicine, Indianapolis, IN, USA

27 <sup>10</sup>Division of Pediatric Endocrinology, Stanford University, Stanford, CA, USA

28 <sup>11</sup>Department of Pediatrics, Yale University, New Haven, CT, USA

29 <sup>12</sup>Department of Pharmaceutical and Health Economics, School of Pharmacy, University of Southern  
30 California, Los Angeles, CA, USA

31 <sup>13</sup>Jaeb Center for Health Research, Tampa, FL, USA  
32  
33  
34  
35  
36  
37  
38  
39  
40  
41

## 42 **Correspondence**

43 Roman Hovorka, PhD

44 University of Cambridge Metabolic Research Laboratories and NIHR Cambridge Biomedical  
45 Research Centre,  
46

47 Wellcome Trust-MRC Institute of Metabolic Science, Box 289,  
48

49 Addenbrooke's Hospital, Hills Road, Cambridge CB2 0QQ, UK

50 Tel: +44 1223 762 862, fax: +44 1223 330 598, e-mail: rh347@cam.ac.uk  
51  
52  
53

54 **Key Words:** Type 1 diabetes, Closed-loop, Artificial pancreas  
55  
56  
57

58 **Word count abstract:** 300

59 **Word count paper:** 4000  
60

## ABSTRACT

**Introduction** Closed-loop systems titrate insulin based on sensor glucose levels, providing novel means to reduce the risk of hypoglycaemia while improving glycaemic control. The present study will assess the effectiveness of 6-month day-and-night closed-loop insulin delivery compared to insulin pump therapy in children and adolescents with type 1 diabetes.

**Methods and analysis** The trial adopts an open-label, multi-centre, multi-national (UK and USA), randomised, single-period, parallel design. Participants (n=130) are children and adolescents (age  $\geq 6$  and  $<19$  years) with type 1 diabetes for at least 1 year, and insulin pump use for at least 3 months with sub-optimal glycaemic control [glycated haemoglobin  $\geq 58$ mmol/mol (7.5%) and  $\leq 86$ mmol/mol (10%)]. After a 2-3 week run-in period, participants will be randomised (1:1 within each stratum) to 6-month use of hybrid closed-loop insulin delivery, or to insulin pump therapy. Analyses will be conducted on an intention to treat basis. The primary outcome is glycated haemoglobin at 6 months. Other key endpoints include time spent in the target glucose range (3.9 to 10mmol/l, 70 to 180mg/dl), mean sensor glucose, and time spent above and below target. Secondary outcomes include standard deviation and coefficient of variation of sensor glucose levels, time with sensor glucose levels  $<3.5$ mmol/l (63mg/dl) and  $<3.0$ mmol/l (54mg/dl), area under the curve of glucose  $<3.5$ mmol/l (63mg/dl), time with glucose levels  $>16.7$ mmol/l (300mg/dl), area under the curve of glucose  $>10.0$ mmol/l (180mg/dl), total, basal and bolus insulin dose, body mass index z-score, and blood pressure. Cognitive, emotional and behavioural characteristics of participants and family members and their responses to the closed-loop system and clinical trial will be assessed. An incremental cost-effectiveness ratio (ICER) for the closed-loop will be estimated.

**Ethics and dissemination** Ethics/institutional review board approval has been gained. The findings of this study will be disseminated by peer-review publications and conference presentations.

**Trial registration** NCT02925299 (ClinicalTrials.gov)

### Strengths and limitations of this study

- The study adopts an open-label, multi-centre, multi-national, randomised, parallel design: it includes a large group of children and adolescents across wide geographical locations
- The trial adopts a 6-month follow-up period of hybrid closed-loop insulin delivery during unrestricted living
- Participants in the two study groups will have an equal number of study visits
- The study design excludes participants with recurrent incidents of severe hypoglycaemia or diabetic ketoacidosis during the previous 6 months, living alone, and those with glycated haemoglobin below 58mmol/mol (7.5%) and above 86mmol/mol (10%) and with high or very low daily insulin requirements (total daily insulin dose  $\geq 2\text{IU/kg/day}$  or  $< 15\text{IU/day}$ )
- All participants are already pump users, somewhat limiting generalizability

## INTRODUCTION

Type 1 diabetes is characterised by a deficiency of insulin caused by immunologically-mediated damage to pancreatic beta cells, leading to raised blood glucose levels. Diabetes is one of the most common metabolic conditions in children and adults. It is estimated that in 2017 1,100,000 children and adolescents (0-19 years) worldwide had type 1 diabetes and that the number of newly diagnosed cases was over 130,000 (1). The incidence rate in children is increasing by approximately 3-4% per year with geographic differences (1). Earlier onset can result in diabetes complications appearing at a younger age, whilst dependence on lifelong insulin imposes a heavy burden on children, carers as well as health care systems.

Despite continuing progress, glycaemic control in children and adolescents with type 1 diabetes remains suboptimal (2). The achievement of recommended treatment goals is limited by the ever present risk of hypoglycaemia. Even in those with the desired level of glycaemic control, non-physiological glucose excursions occur with periods of silent hyper- and hypoglycaemia (3, 4). Individuals have blunted counter-regulatory responses to hypoglycaemia impairing recovery and increasing the threat of future episodes (5). Recurrent episodes may lead to hypoglycaemic unawareness, increasing the risk of severe hypoglycaemia (6). Hypoglycaemia has psychological consequences including the fear of hypoglycaemia with resulting maladaptive coping behaviours such as excessive eating or under-insulinising that may negatively impact glycaemic control (7).

The development of continuous glucose monitoring has been a major advance (8-11). Sensor-augmented pumps combine real-time continuous glucose monitoring with insulin pump (12). Insulin pumps with low glucose suspend feature have been shown to reduce hypoglycaemia (13). These systems, however, overall provide little or no automation to adjust insulin delivery to match glucose excursions.

An artificial pancreas (a closed-loop system) adjusts insulin automatically and represents a realistic treatment option for type 1 diabetes (14). The closed-loop control algorithm translates, in real-time, sensor glucose levels received from the glucose monitoring device and computes the amount of insulin to be delivered by the coupled insulin pump. Hybrid closed-loop systems automatically titrate insulin delivery although the user manages insulin boosts at meal time (15). In 2017, the first closed-loop system entered clinical use in the USA (16).

Closed-loop systems may improve glycaemic control while reducing the risk of hypoglycaemia (17). They have been evaluated in children and adolescents under controlled laboratory conditions (18-20) and in home settings (21-24). Investigations in adults have also been conducted (22, 25, 26). Psychosocial assessments support acceptability and benefits of this therapeutic approach among children/adolescents and carers (27). Closed-loop systems are associated with increased time in near normoglycaemia and reduced time in hypoglycaemia and hyperglycaemia (28). So far, evaluations have been limited to 3 months (22).

The present study will assess the efficacy, safety, utility and acceptability of 6-month day-and-night hybrid closed-loop insulin delivery during unrestricted living in comparison to insulin pump therapy in children and adolescents with type 1 diabetes.

## METHODS AND ANALYSIS

### Overview

This trial adopts an open-label, multi-centre, multi-national, single-period, randomised, parallel group design, involving a 6-month home study period during which day-and-night glucose levels will be managed either by a closed-loop system (intervention group) or by insulin pump therapy (control group) (Figure 1). We aim to recruit up to 150 children and adolescents aged  $\geq 6$  to  $< 19$  years with type 1 diabetes on insulin pump therapy (approximately equal proportion of those aged  $\geq 6$  to 12 years and 13 to  $< 19$  years, a minimum quota of 25% participants with baseline glycated haemoglobin  $> 69$  mmol/mol,  $> 8.5\%$ ). Inclusion and exclusion criteria are summarised in Table 1.

The University of Cambridge (UK) and Jaeb Center for Health Research (USA) are the coordinating centres. Clinical centres include:

- 1) Addenbrooke's Hospital, Cambridge, UK
- 2) Barbara Davis Center for Childhood Diabetes, Aurora, USA
- 3) Indiana University, Indianapolis, USA
- 4) Leeds Teaching Hospital, Leeds, UK
- 5) Nottingham Children's Hospital, Nottingham, UK
- 6) Southampton Children's Hospital, Southampton, UK
- 7) Stanford University, Stanford, California, USA
- 8) Yale University, New Haven, Connecticut, USA

Cognitive, emotional, and behavioural characteristics of participants and family members and their response to the closed-loop will be assessed gathering both quantitative (validated surveys) and qualitative data (focus groups). Written informed consent/assent will be obtained from all participants and guardians before any study-related activities.

### Study schedule

The study will comprise up to 8 visits and 6 telephone/email contacts (see Table 2 and Table 3). The maximum study duration is 8 months.

### Screening and baseline assessment

At screening, blood samples for full blood count, liver, thyroid function and anti-transglutaminase antibodies (with IgA levels if not done within previous 12 months) will be taken. Non-hypoglycaemia C-peptide, glucose and glycated haemoglobin will be measured and a urine pregnancy test in females of child-bearing potential will be performed. Surveys investigating participants' quality of life, psychosocial and cognitive functioning, and response to their current treatment will be distributed. Participants will be fitted with a blinded continuous glucose-monitoring device (Libre Pro, Abbott Diabetes Care, Alameda, CA, USA) that will be worn during the run-in period at home for up to 14 days.

### Run-in period

During a 2-3 week run-in period, subjects will continue using their own insulin pump. Data obtained from blinded continuous glucose monitoring sensors and pump downloads may be utilised for treatment adjustments. The run-in period may be extended/repeated if no or



1  
2  
3 limited sensor data is available and/or if further optimisation is indicated. At least 10 days of  
4 sensor data need to be collected.  
5

## 6 7 **Randomisation**

8  
9 Central randomisation software will be used with stratification by site and baseline glycated  
10 haemoglobin. The randomisation ratio will be 1:1 within each stratum. The randomisation list  
11 created by the study statistician is encrypted.  
12

## 13 **Treatment period**

### 14 15 *1. Automated day and night hybrid closed-loop insulin delivery combined with low glucose* 16 *suspend feature (interventional arm)* 17

18 Participants allocated to the closed-loop group will be trained on using the study insulin pump  
19 (modified Medtronic 640G pump, investigational use only, Medtronic, Northridge, CA, USA)  
20 and real-time continuous glucose sensor (Guardian 3, Medtronic). Once deemed competent  
21 with the use of the devices, participants will receive training required for the closed-loop  
22 system. Competency on the use of closed-loop will be evaluated. During the closed-loop  
23 period, meal boluses will be programmed by the participant to be delivered by the insulin  
24 pump based on estimated ingested carbohydrate amounts. Specific instructions during  
25 closed-loop related to exercise management, sick day rules, hypo- and hyperglycaemia  
26 management and technical troubleshooting will be provided.  
27  
28

### 29 30 *2. Usual care (conventional or sensor-augmented pump therapy) (control arm)* 31

32 Participants in the control arm will receive refresher training on key aspects of insulin pump  
33 therapy. The use of capillary self-monitoring of blood glucose will be highlighted. During the  
34 6-month control intervention period, subjects will continue using either their own insulin pump  
35 alone or combined with their pre-study glucose monitoring device.  
36  
37

38 At the end of the study initiation visit, participants in both study groups will be fitted with a  
39 blinded continuous glucose monitoring system (Libre Pro) that will be worn for up to 14 days.  
40 If the sensor fails or gets detached, another sensor may be inserted. The sensor data may  
41 be used to optimise insulin delivery.  
42  
43

## 44 **Assessments at 3 months and 6 months**

45 A blood sample will be collected for measurement of glycated haemoglobin. A urine  
46 pregnancy test in females of child-bearing potential will be performed. As per usual clinical  
47 practice glucometer downloads and pump data will be reviewed, and adjustments to insulin  
48 pump settings will be made as required. Validated surveys evaluating the impact of the  
49 devices employed on quality of life, psychosocial and cognitive functioning, diabetes  
50 management and treatment satisfaction will be administered. At the end of the 3-month  
51 follow-up visit, participants in both study groups will be fitted with blinded continuous glucose  
52 monitoring systems (Libre Pro). For assessment of glycaemic control during the final 3-month  
53 period of the trial, participants in both study groups will be fitted with a blinded continuous  
54 glucose monitoring system 2 to 4 weeks before the end of study. At the 6-month visit, the  
55 same procedures as at the 3-month visit will be followed. A subset of subjects/guardians will  
56 be invited to join follow-up focus groups.  
57  
58  
59  
60

### **Study contacts during 6-month study period**

Participants in the two study groups will have an equal number of contact visits. The first planned contact will occur within 24-48 hours after study initiation visit. During the first 2 weeks of the study period, participants will be contacted weekly. Thereafter, participants will be contacted monthly. Subjects/parents and/or the clinical team are free to adjust insulin therapy as per usual clinical practice, but no active treatment optimisation will be undertaken by the research team.

### **Devices download**

Participants will be invited to download insulin delivery and glucose data regularly from the insulin pump and blood glucose meter.

### **Closed-loop system**

The FlorenceM closed-loop system (Figure 2) incorporates a computer-based algorithm hosted by an Android smartphone, which interacts wirelessly with the modified investigational-use-only 640G pump through a proprietary translator device included in the smartphone's enclosure. By using the information received from the glucose sensor every ten minutes, the system computes a new temporary basal insulin infusion rate, which is automatically sent to the insulin pump. The treat-to-target control algorithm aims to achieve a default glucose level of 5.8mmol/l (104mg/dl) and regulates the actual level depending on fasting versus postprandial status and the accuracy of model-based glucose predictions. No remote monitoring is planned. While the system is charging and connected to internet, the device uploads data on a server. The study pump comprises continuous glucose monitoring receiver and provides hypoglycaemia and hyperglycaemia alarms, which can be activated and personalised by the participants.

### **Safety precautions during closed-loop**

Participants will be asked to perform capillary calibrations before breakfast and dinner. If sensor glucose value is  $>3.0\text{mmol/l}$  (54mg/dl) different from capillary glucose level, the sensor will be recalibrated. These directions are based on an in-silico simulation of hypo- and hyperglycaemia risk using the validated Cambridge simulator (29). If sensor glucose becomes unavailable, the pump will automatically deliver the pre-programmed insulin within 30 minutes. Safety rules limit maximum insulin infusion and suspend insulin delivery when sensor glucose is  $\leq 4.3\text{mmol/l}$  (77mg/dl) or when sensor glucose is rapidly decreasing. In case of a communication failure between control algorithm device and the study pump, the low-glucose feature will interrupt insulin delivery, provided sensor glucose is available. Insulin delivery will be resumed in accordance of the low glucose suspend feature implemented on the study pump. A 24-hour local telephone helpline will be available for any technical device issues or problems related to diabetes management.

### **Participant withdrawal criteria**

The following pre-randomisation withdrawal criteria will apply:

1. Subject/caregiver is unable to demonstrate safe use of study insulin pump as judged by the investigator

- 2.
3. Subject/caregiver fails to demonstrate compliance with insulin pump and capillary self-monitoring of blood glucose during run-in

Pre- and post-randomisation withdrawal criteria will comprise:

3. Subjects/caregivers may terminate participation in the study at any time without necessarily giving a reason and without any personal disadvantage
4. Significant protocol violation or non-compliance
5. Two distinct episodes of severe hypoglycaemia
6. Two distinct episodes of diabetic ketoacidosis unrelated to infusion site failure and related to the use of the closed-loop
7. Decision by the investigator or the sponsor that termination is in the subject's best medical interest
8. Allergic reaction to insulin
9. Allergic reaction to adhesive surface of infusion set or glucose sensor
10. Subject becomes pregnant during the study period

Subjects withdrawn due to reasons 4-10 will be invited to provide blood sample at the end of the planned study intervention for the assessment of glycated haemoglobin.

### **Psychosocial evaluations**

Cognitive, emotional, and behavioural characteristics of participating subjects and family members and their response to the closed-loop system and clinical trial will be assessed using validated surveys and focus groups. Surveys will be completed at baseline (prior to randomisation), at 3 and 6 months.

To assess how strongly participants value the benefits of the closed-loop (compared with the default insulin pump), we will conduct a discrete choice experiment (DCE). In the DCE, respondents will be asked to answer a series of binary choice questions (e.g., "Given a choice between option A or B, which would you prefer...") where those two options offer differing strengths and weaknesses. By varying the performance levels of these different desirable characteristics, we can assess their relative importance.

Focus groups will be completed at the end of the study (6 months). We will conduct virtual focus groups using HIPAA-approved software supported by Stanford University. Focus groups will be run with 3-6 participants and we will work from a script of open-ended questions used to gather feedback and reactions to the closed-loop system/insulin pump therapy, the clinical trial and quality of life changes. The participation of a moderator with advanced training will ensure consistency across groups. Sessions will be audio- and video-taped and transcribed by a professional transcription service.

### **Blood samples**

Screening blood samples will be measured locally. Additional blood samples will be taken for the measurement of non-hypoglycaemia C-peptide and glycated haemoglobin at a central laboratory. Glycated haemoglobin will be assessed at baseline, 3, and 6 months. At each time point, glycated haemoglobin will be measured locally (clinical care) and centrally (analysis of study endpoints). The central analysis will be performed using an International Federation of Clinical Chemistry and Laboratory Medicine aligned method.

## Patient and Public Involvement

The research question and study endpoints are based on feedback from participants of previous studies and in line with prioritising by stakeholders (30). The study design and the assessment of the burden of the intervention were reviewed by focus groups. Results will be disseminated to participants and general public through social media and will be made available on the sponsor's website.

## Statistical analysis

### *Primary Outcome Analysis*

The primary analysis will follow the intention-to-treat principle. Data from all randomised subjects will be analysed in the group to which the subjects were assigned through randomisation regardless of the actual treatment received. Data will not be truncated due to protocol deviations.

The primary analysis will evaluate between group differences in glycated haemoglobin levels at the end of treatment period. A 5% significance level will be considered statistically significant for the primary outcome comparison.

Means  $\pm$  standard deviation (SD) values or percentiles appropriate to the distribution will be reported for the primary outcome by treatment group. The two treatment groups will be compared using a linear regression model adjusting for glycated haemoglobin at baseline, age, and clinical centre as random effect. A 95% confidence interval will be reported for the difference between the randomisation groups based on the linear regression model. Residual values will be examined for an approximate normal distribution. If values are highly skewed, then a transformation or robust statistical methods (e.g., non-parametric or MM estimation) will be used instead. A detailed analysis plan will be provided separately.

### *Other Key Endpoints*

For the following key endpoints at 6 months, the familywise type I error rate will be controlled at two-sided  $\alpha = 0.05$ . A gatekeeping strategy will be used, where the primary endpoint will be tested first, if passing the significance testing, other key endpoints will be tested in the order listed below using the fixed-sequence method at  $\alpha = 0.05$ .

- Time spent in the target glucose range from 3.9 to 10.0mmol/l (70 to 180mg/dl)
- Mean sensor glucose
- Time spent above target glucose 10.0mmol/l (180mg/dl)
- Time spent below target glucose 3.9mmol/l (70mg/dl)

If a non-significant ( $p > 0.05$ ) result is obtained for any outcome on this list, no further hypothesis testing will be performed for any metrics further down on the list.

### *Secondary Efficacy Analyses*

For these exploratory analyses, the false discovery rate will be used to account for multiple comparisons:

#### Continuous glucose monitoring derived indices

- Standard deviation of sensor glucose
- Sensor glucose variability measured with the coefficient of variation

- The time with glucose <3.5mmol/l (63mg/dl)
- The time with glucose <3.0mmol/l (54mg/dl)
- Area under the curve of glucose below 3.5mmol/l (63mg/dl)
- The time spent in significant hyperglycaemia (glucose >16.7mmol/l, 300mg/dl)
- Area under the curve of glucose above 10.0mmol/l (180mg/dl)

The following sensor glucose metrics will also be calculated separately for day-time period (06:00-23:59) and night-time period (00:00-05:59):

- The time with sensor glucose from 3.9 to 10.0mmol/l (70-180mg/dl)
- Mean glucose
- Glucose variability as measured by standard deviation
- The time with sensor glucose <3.5mmol/l (63mg/dl)

#### Binary metrics for glycated haemoglobin

- HbA1c <53mmol/mol (7.0%)
- HbA1c <58mmol/mol (7.5%)
- Relative reduction  $\geq 10\%$  from baseline
- Absolute reduction  $\geq 0.5\%$  from baseline
- Absolute reduction  $\geq 1\%$  from baseline
- Absolute reduction  $\geq 1\%$  from baseline or HbA1c <53mmol/mol (7.0%)

#### Insulin and other endpoints

- Total, basal and bolus insulin dose
- Body weight (BMI z-score)
- Blood pressure

The above described glycaemic metrics will be based on sensor glucose levels collected during post-randomisation periods of blinded sensors wear.

### **Safety analyses**

The following events will be recorded and compared between treatment groups:

- Number of severe hypoglycaemia events per subject and incidence rate per 100 person-years
- Number of diabetic ketoacidosis events per subject and incidence rate per 100 person-years
- Sensor glucose-measured hypoglycaemic events per week (>15 minutes with glucose <3mmol/l, 54mg/dl)
- Sensor glucose-measured hyperglycaemic events per week (>15 minutes with glucose >16.7mmol/l, 300mg/dl)
- Proportion of subjects with worsening of glycated haemoglobin from baseline to 6 months by >0.5%

If we record enough observed events to allow formal statistical modelling for above safety outcomes, we will perform the following analyses. Poisson regression models will be constructed to compare the treatment group difference for event rates by adjusting for age, baseline glycated haemoglobin and random site effect. If any outlier exists, a robust Poisson

1  
2  
3 regression model will be used instead. For binary glycated haemoglobin outcome, logistic  
4 regression models will be used to compare the treatment group difference by adjusting for  
5 age, baseline glycated haemoglobin and random site effect.  
6  
7

### 8 **Utility assessments**

9  
10 The following system use/function outcomes in the intervention arm will be tabulated:

- 11 • Number of low glucose suspend events
  - 12 • Percentage of time when closed-loop system use is functioning
  - 13 • Percentage of time when continuous glucose monitoring is used
- 14  
15  
16

### 17 **Subgroup analyses**

18  
19 No subgroups were considered during the power calculations. Interpretation of any subgroup  
20 analyses will depend on whether the overall analysis demonstrates a significant treatment  
21 group difference. In the absence of such difference, if performed, the subgroup analyses will  
22 be interpreted with caution.  
23  
24

### 25 **Psychosocial analyses**

26  
27 Quantitative data on usability and satisfaction will be analysed using simple descriptive  
28 statistics. Additionally, we will analyse scores from the cognitive, emotional, and behavioural  
29 assessments to determine if changes occur over time and between groups.  
30  
31

32 We will construct predictive models in the general linear framework to examine the  
33 associations with primary outcomes. For the discrete choice experiment (DCE), the strength  
34 of preference (importance) of each performance attribute will be estimated from the pooled  
35 DCE responses using standard regression analysis techniques.  
36  
37

38 Qualitative data will be analysed using Atlas.ti (release 6.0; Scientific Software Development  
39 GmbH, Berlin, Germany) to organize and manage the entire corpus of focus group data.  
40

### 41 **Cost utility analyses**

42  
43 To inform reimbursement and other policy decision-making, we will conduct a cost utility  
44 analysis on the benefits of closed-loop. The analysis timeframe for both costs and benefits  
45 will include not just the study period, but also anticipated future impacts. Costs will be  
46 denominated in US Dollars. They will be framed to include both health-related expenditures  
47 and any realised or projected incremental health cost savings. Utility will be quantified in  
48 quality adjusted life years (QALYS). We will elicit health related quality of life (HRQOL)  
49 during the study period using two preference based measures of health status: the Child  
50 Health Utility 9D (31) and the EuroQol 5D-Y (32). Future health and cost impacts, beyond the  
51 study period, will be estimated using numerical modelling. Incremental cost effectiveness  
52 ratios, comparing the closed-loop system to usual care will be calculated.  
53  
54

### 55 **Interim analysis**

56  
57 We will not perform an interim analysis.  
58  
59  
60

## **Per-protocol analysis**

We will conduct a per-protocol analysis in order to replicate the primary analysis, but limited to participants who did not withdraw from the study (withdrawals excluded even if they return for a 6-month glycated haemoglobin measurement) and used closed-loop for at least 70% of the time (intervention group).

## **Power calculation**

Data from the JDRF Continuous Glucose Monitoring Randomised Clinical Trial (33) from subjects who would have met the eligibility criteria for the current trial were used to project the distribution of baseline and 6-month glycated haemoglobin. Among N=53 subjects meeting the eligibility criteria in the JDRF CGM RCT (n=20 subjects 8 to 12 years of age and n=33 subjects 13 to 18 years of age), the upper limit of the confidence interval for the effective SD of glycated haemoglobin was 0.71%. With this effective SD, for a true 0.4% reduction in glycated haemoglobin, power = 85%, 2-sided type 1 error = 5%, 1:1 randomisation, total sample size is estimated to be 116. Adding 10% for potential dropout/non-compliance results in a final total sample size of approximately 128 (64 in each treatment group).

## **STUDY MANAGEMENT**

### **Data Safety Monitoring Board**

A Data Safety Monitoring Board (DSMB) will be instituted. The DSMB will be notified of all serious adverse events and any unanticipated adverse device effects/events and will perform regular safety data review. The DSMB will report to the National Institute of Diabetes and Digestive and Kidney Diseases (the Funder) any safety concerns and recommendations for suspension or early termination of the trial.

### **Study sponsors**

In the UK the study sponsors are the University of Cambridge and the Cambridge University Hospitals NHS Foundation Trust. Study sponsor in the USA is the Jaeb Center for Health Research.

### **Study management committee**

A study management committee composed of the Chief Investigator, Study Coordinators, and Study Data Manager will meet monthly to discuss the operational aspects of the trial.

### **Data management and monitoring**

Designated personnel from the Coordinating Centres will be responsible for maintaining quality assurance and quality control systems to ensure that the clinical portion of the trial is conducted and data are generated, documented and reported in compliance with the protocol, Good Clinical Practice, and the regulatory requirements.

We will observe confidentiality of subject data. Personal details for each participant with a link to a unique identification number will be held locally on a study screening log in the Trial Master File at each of the investigation centres. These details will not be disclosed at any other stage during the study, and all individual results will remain anonymous.

## Indemnity

Indemnity for any harm arising on the conduct of research will be provided according to arrangements in respective countries:

1) UK - any liability arising from study design will be covered by the clinical trial insurance policy organised by the University of Cambridge. National Health Service indemnity cover will apply for any claims arising from management and conduct of research.

2) USA - any liability arising from study design will be under the responsibility of the participants or their insurance company.

## ETHICS AND DISSEMINATION

Approval from independent Research Ethics Committee/Institutional Review Board has been obtained in the UK and the USA. The study has undergone a review by regulatory authorities in the UK (Medicines and Healthcare products Regulatory Agency) and in the USA (Food and Drug Administration). All participants will be provided with oral and written information about the trial and procedures involved in the study before obtaining written informed consent. For minors, parents/guardians will provide written informed consent, and written assent will be gained.

Standard operating procedures for monitoring and reporting of all adverse events and adverse device effects will be in place including serious adverse events, serious adverse device effects and specific adverse events, such as severe hypoglycaemia and significant hyperglycaemia with ketosis.

Any substantial amendments to the protocol and other documents shall be submitted to, and approved by, the independent Research Ethics Committee and Institutional Review Board (UK, East of England-Cambridge South Research Ethics Committee, #16/EE/0380; USA, Jaeb Center for Health Research Institutional Review Board certified by the Office for Human Research Protections, FWA #00000024) and the regulatory authorities, prior to implementation as per nationally agreed guidelines.

The study started enrolling participants in June 2017. The study is expected to complete clinical follow up by November 2019 and to report results in 2020. The trial results will be disseminated in internationally peer-reviewed scientific journals.



### **Acknowledgements**

Jasdip Mangat supported development and validation of closed-loop system. Josephine Hayes, Matthew Haydock and Nicole Ashcroft (Institute of Metabolic Science, University of Cambridge) provided administrative support. NIHR Cambridge Clinical Research Facility will support the research team in their research-related activities. Artificial Pancreas focus group contributors provided feedback on the study design. West Midlands Young Persons Advisory Group reviewed Participant Information Sheets.

### **Contributors**

RH, FC, LD, NT, RPW, LADM, BAB, SAW, CLA, and KKH co-designed the study. RH designed and implemented the glucose controller. GM and RH wrote the manuscript. All authors critically reviewed the report. No writing assistance was provided.

### **Funding**

National Institute of Diabetes and Digestive and Kidney Diseases of the National Institutes of Health under Award Number UC4DK108520. Additional support for the artificial pancreas work is from National Institute for Health Research Cambridge Biomedical Research Centre, and Wellcome Strategic Award (100574/Z/12/Z). Medtronic is supplying discounted CGM devices, sensors, and details of communication protocol to facilitate real-time connectivity. Abbott Diabetes Care is providing Libre Pro sensors.

### **Relevant disclosures**

RH reports having received speaker honoraria from Eli Lilly and Novo Nordisk, serving on advisory panel for Eli Lilly and Novo Nordisk, receiving licence fees from BBraun and Medtronic. RH and MEW report patent patents and patent applications.

MT has received speaker honoraria from Medtronic and NovoNordisk.

RPW reports receiving speaker honoraria from Dexcom and serving on advisory panels for Eli Lilly and Novo Nordisk and research support from Bigfoot Biomedical, Dexcom, Lexicon, Mannkind and Novo Nordisk. BAB is on Advisory Boards for Novo-Nordisk and Convatec, has received research support from Medtronic Diabetes, Tandem Diabetes, Insulet, Convatec, and Dexcom. SAW has received speaker honoraria from Medtronic, Insulet, and Tandem, and has received consultant honoraria from Sanofi and Zealand Pharmaceuticals.

KKH has received research support from Dexcom, Inc for an investigator-initiated project; he has received consultant fees from Lilly Innovation Center, Bigfoot Biomedical, and Insulet, Inc. LADM reports grants from Medtronic.

GM, JMA, SH, CB, FC, LD, NT, CLA, SF, CK, JS, SB, PC declare no competing financial interests exist.

### **Ethics and IRB approvals**

East of England - Cambridge South Research Ethics Committee (UK), Jaeb Center for Health Research Institutional Review (IRB) Office (813-975-8690 or irb@jaeb.org) (USA).

### **Provenance and peer review**

Not commissioned, internally peer reviewed.

**Table 1.** Inclusion and exclusion criteria

| <b>Summary of inclusion criteria</b>                                                                                                                                                                                                                                                                                                                                                                                                                                                                                                                                                                                                                                                                                                                                                                                                                                                                                                                                                                                                                                                                                                                                                                                                                                                                                                                                                                                                                                                                                                                                                                                                                                                                                                                                                                                                                                                                                                                                                                                                                                                                                                                                                                                                                                                                                                                                                                                                                                                                                                                                                                                                                                                                                                                                                                                             |  |
|----------------------------------------------------------------------------------------------------------------------------------------------------------------------------------------------------------------------------------------------------------------------------------------------------------------------------------------------------------------------------------------------------------------------------------------------------------------------------------------------------------------------------------------------------------------------------------------------------------------------------------------------------------------------------------------------------------------------------------------------------------------------------------------------------------------------------------------------------------------------------------------------------------------------------------------------------------------------------------------------------------------------------------------------------------------------------------------------------------------------------------------------------------------------------------------------------------------------------------------------------------------------------------------------------------------------------------------------------------------------------------------------------------------------------------------------------------------------------------------------------------------------------------------------------------------------------------------------------------------------------------------------------------------------------------------------------------------------------------------------------------------------------------------------------------------------------------------------------------------------------------------------------------------------------------------------------------------------------------------------------------------------------------------------------------------------------------------------------------------------------------------------------------------------------------------------------------------------------------------------------------------------------------------------------------------------------------------------------------------------------------------------------------------------------------------------------------------------------------------------------------------------------------------------------------------------------------------------------------------------------------------------------------------------------------------------------------------------------------------------------------------------------------------------------------------------------------|--|
| <ul style="list-style-type: none"> <li>▪ Age ≥6 and &lt;19 years</li> <li>▪ Type 1 diabetes as defined by World Health Organization (34) for at least 1 year</li> <li>▪ Use of an insulin pump for at least 3 months, with good knowledge of insulin self-adjustment by subject or caregiver as judged by the investigator</li> <li>▪ Using U-100 rapid acting insulin analogues Aspart or Lispro only</li> <li>▪ Willing to perform regular finger-prick blood glucose monitoring, with at least 4 blood glucose measurements per day</li> <li>▪ Screening glycated haemoglobin ≥58 mmol/mol (7.5%) and ≤86mmol/mol (10%) based on analysis from local laboratory</li> <li>▪ Literate in English</li> <li>▪ Willing to wear continuous glucose sensor and closed-loop system at home</li> <li>▪ Willing to follow study specific instructions</li> <li>▪ Willing to upload pump and glucose sensor data at regular intervals</li> <li>▪ Access to Wi-Fi</li> <li>▪ Living with someone who is trained to administer glucagon and is able to seek emergency assistance</li> </ul>                                                                                                                                                                                                                                                                                                                                                                                                                                                                                                                                                                                                                                                                                                                                                                                                                                                                                                                                                                                                                                                                                                                                                                                                                                                                                                                                                                                                                                                                                                                                                                                                                                                                                                                                                |  |
| <b>Summary of exclusion criteria</b>                                                                                                                                                                                                                                                                                                                                                                                                                                                                                                                                                                                                                                                                                                                                                                                                                                                                                                                                                                                                                                                                                                                                                                                                                                                                                                                                                                                                                                                                                                                                                                                                                                                                                                                                                                                                                                                                                                                                                                                                                                                                                                                                                                                                                                                                                                                                                                                                                                                                                                                                                                                                                                                                                                                                                                                             |  |
| <ul style="list-style-type: none"> <li>▪ Living alone</li> <li>▪ Current use of any closed-loop system</li> <li>▪ Any other physical or psychological disease likely to interfere with the normal conduct of the study and interpretation of the study results as judged by the investigator</li> <li>▪ Untreated coeliac disease, adrenal insufficiency, or untreated thyroid disease</li> <li>▪ Current treatment with drugs known to interfere with glucose metabolism, e.g., systemic corticosteroids, non-selective beta-blockers and monoamine oxidase inhibitors, etc.</li> <li>▪ Known or suspected allergy to insulin</li> <li>▪ Clinically significant nephropathy (estimated glomerular filtration rate &lt;45ml/min) or on dialysis, neuropathy or active retinopathy (presence of maculopathy or proliferative changes) as judged by the investigator</li> <li>▪ Recurrent incidents of severe hypoglycaemia (&gt;1 episode) during the previous 6 months (adolescents: severe hypoglycaemia is defined as an event requiring assistance of another person to actively administer carbohydrates, glucagon, or take other corrective actions including episodes of hypoglycaemia severe enough to cause unconsciousness, seizures or attendance at hospital; children: severe hypoglycaemia is defined as an event associated with a seizure or loss of consciousness)</li> <li>▪ Recurrent incidents of diabetic ketoacidosis (&gt;1 episode) during the previous 6 months</li> <li>▪ Unwilling to avoid regular use of acetaminophen</li> <li>▪ Lack of reliable telephone facility for contact</li> <li>▪ Total daily insulin dose ≥2 IU/kg/day and &lt;15 IU/day</li> <li>▪ Pregnancy, planned pregnancy, or breast feeding</li> <li>▪ Severe visual or hearing impairment</li> <li>▪ Seizure disorder</li> <li>▪ Medically documented allergy towards the adhesive (glue) of plasters or unable to tolerate tape adhesive in the area of sensor placement</li> <li>▪ Serious skin diseases (e.g., psoriasis vulgaris, bacterial skin diseases) located at places of the body likely to be used for localisation of the glucose sensor</li> <li>▪ Abusing illicit drugs, prescription drugs or alcohol</li> <li>▪ Use of pramlintide (Symlin), or other non-insulin glucose lowering agents including sulphonylureas, biguanides, DPP4-Inhibitors, GLP-1 analogues, SGLT-1/ 2 inhibitors at time of screening</li> <li>▪ Shift work with working hours between 10pm and 8am</li> <li>▪ Sick cell disease, haemoglobinopathy, or has received red blood cell transfusion or erythropoietin within 3 months prior to time of screening</li> <li>▪ Eating disorder such as anorexia or bulimia</li> <li>▪ Employed by Medtronic Diabetes or with immediate family members employed by Medtronic Diabetes</li> </ul> |  |

**Table 2.** Schedule of study visits / phone contacts when the participant is randomised to day-and-night closed-loop combined with low glucose feature (intervention group)

|                                         | Visit/<br>contact                                                                                                            | Description                                                                                                                                            | Start relative to previous /<br>next Visit / Activity                                               | Duration  |
|-----------------------------------------|------------------------------------------------------------------------------------------------------------------------------|--------------------------------------------------------------------------------------------------------------------------------------------------------|-----------------------------------------------------------------------------------------------------|-----------|
| <b>Run-in</b>                           | <b>Visit 1</b>                                                                                                               | Recruitment visit: consent, HbA1c, screening bloods, urine pregnancy test, baseline surveys, blinded CGM training and insertion                        |                                                                                                     | 1-4 hours |
|                                         | <b>Visit 2</b>                                                                                                               | Review of baseline bloods, pump settings and CGM data; adjustment of treatment                                                                         | 2 weeks after Visit 1 (+1 week); Run-in could be repeated                                           | 1-2 hours |
| <b>Training Period</b>                  | <b>Visit 3</b>                                                                                                               | Randomisation, repeat HbA1c if Visit 3 and Visit 1 are >28 days apart, urine pregnancy test, study pump training and initiation, competency assessment | May coincide with Visit 2, within 8 weeks of Visit 1                                                | 3-4 hours |
|                                         | <b>Visit 3a</b>                                                                                                              | Real-time CGM training and initiation, competency assessment                                                                                           | Within 0 to 7 days of Visit 3 (Visit 3a may coincide with Visit 3; training visits can be repeated) | 2-4 hours |
| <b>CL + LGS Intervention (6 months)</b> | <b>Visit 4*</b>                                                                                                              | CL initiation at clinic/home: data download, CL and low glucose feature training, competency assessment, blinded CGM                                   | 4 weeks after Randomisation ( $\pm 1$ week)                                                         | 2-6 hours |
|                                         | Contact 1                                                                                                                    | Review use of study devices; study update                                                                                                              | Within 24 to 48 hours after Visit 4                                                                 | <1 hour   |
|                                         | <b>Visit 5**</b>                                                                                                             | Review use of study devices; study update                                                                                                              | 1 week after Visit 4 ( $\pm 3$ days)                                                                | <1 hour   |
|                                         | Contact 2                                                                                                                    | Review use of study devices; study update                                                                                                              | 2 weeks after Visit 4 ( $\pm 3$ days)                                                               | <1 hour   |
|                                         | Contact 3                                                                                                                    | Review use of study devices; study update                                                                                                              | 1 month after Visit 4 ( $\pm 2$ weeks)                                                              | <1 hour   |
|                                         | Contact 4                                                                                                                    | Review use of study devices; study update                                                                                                              | 2 months after Visit 4 ( $\pm 2$ weeks)                                                             | <1 hour   |
|                                         | <b>Visit 6</b>                                                                                                               | 3-month visit: HbA1c, urine pregnancy test, data download, blinded CGM, surveys                                                                        | 4 months after Randomisation ( $\pm 2$ weeks)                                                       | 1-3 hours |
|                                         | Contact 5                                                                                                                    | Review use of study devices; study update                                                                                                              | 5 months after Randomisation ( $\pm 2$ weeks)                                                       | <1 hour   |
|                                         | Contact 6                                                                                                                    | Review use of study devices; study update                                                                                                              | 6 months after Randomisation ( $\pm 2$ weeks)                                                       | <1 hour   |
|                                         | <b>Visit 7</b>                                                                                                               | Blinded CGM                                                                                                                                            | 2-4 weeks before planned Visit 8                                                                    | <0.5 hour |
| <b>Visit 8</b>                          | End of closed-loop treatment arm (6 months of CL): HbA1c, data download, surveys and focus groups; resume usual pump therapy | 7 months after Randomisation ( $\pm 2$ weeks)                                                                                                          | 1-3 hours                                                                                           |           |

\* In-person clinic visit mandatory in USA only.

\*\* Could be done via phone/e-mail in UK. In-person visit mandatory in USA only.  
HbA1c, glycated haemoglobin; CGM, continuous glucose monitoring; CL, closed-loop.

**Table 3.** Schedule of study visits / phone contacts when the participant is randomised to usual care (conventional or sensor-augmented insulin pump therapy) (control group)

|                                                           | Visit/<br>contact                                                                                                                                                         | Description                                                                                                                                         | Start relative to previous /<br>next Visit / Activity        | Duration  |
|-----------------------------------------------------------|---------------------------------------------------------------------------------------------------------------------------------------------------------------------------|-----------------------------------------------------------------------------------------------------------------------------------------------------|--------------------------------------------------------------|-----------|
| <b>Run-in</b>                                             | <b>Visit 1</b>                                                                                                                                                            | Recruitment visit: consent, HbA1c, screening bloods, urine pregnancy test, baseline surveys, blinded CGM training and insertion                     |                                                              | 1-4 hours |
|                                                           | <b>Visit 2</b>                                                                                                                                                            | Review of baseline bloods, pump settings and CGM data; adjustment of treatment                                                                      | 2 weeks after Visit 1 (+1 week);<br>Run-in could be repeated | 1-2 hours |
| <b>Training period</b>                                    | <b>Visit 3</b>                                                                                                                                                            | Randomisation, repeat HbA1c if Visit 3 and Visit 1 are >28 days apart, urine pregnancy test, insulin pump refresher training, competency assessment | May coincide with Visit 2, within 8 weeks of Visit 1         | 3-4 hours |
| <b>Usual insulin pump therapy Intervention (6 months)</b> | <b>Visit 4*</b>                                                                                                                                                           | Initiation of standard therapy arm at clinic/home, glucometer download, recording of current insulin requirements, blinded CGM                      | 4 weeks after Randomisation ( $\pm 1$ week)                  | 2-6 hours |
|                                                           | Contact 1                                                                                                                                                                 | Study update                                                                                                                                        | Within 24 to 48 hours after Visit 4                          | <1 hour   |
|                                                           | <b>Visit 5**</b>                                                                                                                                                          | Study update                                                                                                                                        | 1 week after Visit 4 ( $\pm 3$ days)                         | <1 hour   |
|                                                           | Contact 2                                                                                                                                                                 | Study update                                                                                                                                        | 2 weeks after Visit 4 ( $\pm 3$ days)                        | <1 hour   |
|                                                           | Contact 3                                                                                                                                                                 | Study update                                                                                                                                        | 1 month after Visit 4 ( $\pm 2$ weeks)                       | <1 hour   |
|                                                           | Contact 4                                                                                                                                                                 | Study update                                                                                                                                        | 2 months after Visit 4 ( $\pm 2$ weeks)                      | <1 hour   |
|                                                           | <b>Visit 6</b>                                                                                                                                                            | 3-month visit: HbA1c, urine pregnancy test, glucometer download, recording of current insulin requirements, surveys, blinded CGM                    | 4 months after Randomisation ( $\pm 2$ weeks)                | 1-3 hours |
|                                                           | Contact 5                                                                                                                                                                 | Study update                                                                                                                                        | 5 months after Randomisation ( $\pm 2$ weeks)                | <1 hour   |
|                                                           | Contact 6                                                                                                                                                                 | Study update                                                                                                                                        | 6 months after Randomisation ( $\pm 2$ weeks)                | <1 hour   |
|                                                           | <b>Visit 7</b>                                                                                                                                                            | Blinded CGM                                                                                                                                         | 2-4 weeks before planned Visit 8                             | <0.5 hour |
| <b>Visit 8</b>                                            | End of standard pump therapy treatment arm (6 months): HbA1c, glucometer download, recording of current insulin requirements, surveys and focus groups, resume usual care | 7 months after Randomisation ( $\pm 2$ weeks)                                                                                                       | 1-3 hours                                                    |           |

\* In-person clinic visit mandatory in USA only.

\*\* Could be done via phone/e-mail.

HbA1c, glycated haemoglobin; CGM, continuous glucose monitoring.

1  
2  
3 **Figure Legends**  
4

5 **Figure 1** Study flow chart. HbA1c, glycated haemoglobin; CGM, continuous glucose  
6 monitoring.  
7

8 **Figure 2** FlorenceM closed-loop system prototype.  
9

10 The system consists of a continuous glucose monitoring transmitter with Guardian 3 sensor  
11 (Medtronic), an insulin pump (modified 640G pump, Medtronic) and an Android smartphone  
12 running the control algorithm (Cambridge).  
13  
14  
15  
16  
17  
18  
19  
20  
21  
22  
23  
24  
25  
26  
27  
28  
29  
30  
31  
32  
33  
34  
35  
36  
37  
38  
39  
40  
41  
42  
43  
44  
45  
46  
47  
48  
49  
50  
51  
52  
53  
54  
55  
56  
57  
58  
59  
60

## References

1. International Diabetes Federation. IDF Diabetes Atlas 2017. 8th Edition 2017 <http://www.diabetesatlas.org> (last accessed 26th July 2018).
2. Wood JR, Miller KM, Maahs DM, Beck RW, DiMeglio LA, Libman IM, et al. Most youth with type 1 diabetes in the T1D Exchange Clinic Registry do not meet American Diabetes Association or International Society for Pediatric and Adolescent Diabetes clinical guidelines. *Diabetes Care*. 2013;36(7):2035-7.
3. Diabetes Research in Children Network Study G, Buckingham B, Beck RW, Tamborlane WV, Xing D, Kollman C, et al. Continuous glucose monitoring in children with type 1 diabetes. *J Pediatr*. 2007;151(4):388-93, 93 e1-2.
4. Bode BW, Schwartz S, Stubbs HA, Block JE. Glycemic characteristics in continuously monitored patients with type 1 and type 2 diabetes: normative values. *Diabetes Care*. 2005;28(10):2361-6.
5. Cryer PE. Diverse causes of hypoglycemia-associated autonomic failure in diabetes. *N Engl J Med*. 2004;350(22):2272-9.
6. Cryer PE. Mechanisms of hypoglycemia-associated autonomic failure and its component syndromes in diabetes. *Diabetes*. 2005;54(12):3592-601.
7. Wild D, von Maltzahn R, Brohan E, Christensen T, Clauson P, Gonder-Frederick L. A critical review of the literature on fear of hypoglycemia in diabetes: Implications for diabetes management and patient education. *Patient Educ Couns*. 2007;68(1):10-5.
8. Kropff J, DeVries JH. Continuous Glucose Monitoring, Future Products, and Update on Worldwide Artificial Pancreas Projects. *Diabetes Tech Ther*. 2016;18 Suppl 2:S253-63.
9. Juvenile Diabetes Research Foundation Continuous Glucose Monitoring Study G, Tamborlane WV, Beck RW, Bode BW, Buckingham B, Chase HP, et al. Continuous glucose monitoring and intensive treatment of type 1 diabetes. *N Engl J Med*. 2008;359(14):1464-76.
10. Kordonouri O, Pankowska E, Rami B, Kapellen T, Coutant R, Hartmann R, et al. Sensor-augmented pump therapy from the diagnosis of childhood type 1 diabetes: results of the Paediatric Onset Study (ONSET) after 12 months of treatment. *Diabetologia*. 2010;53(12):2487-95.
11. Pickup JC, Freeman SC, Sutton AJ. Glycaemic control in type 1 diabetes during real time continuous glucose monitoring compared with self monitoring of blood glucose: meta-analysis of randomised controlled trials using individual patient data. *Bmj*. 2011;343:d3805.
12. Bergenstal RM, Tamborlane WV, Ahmann A, Buse JB, Dailey G, Davis SN, et al. Effectiveness of sensor-augmented insulin-pump therapy in type 1 diabetes. *N Engl J Med*. 2010;363(4):311-20.
13. Bergenstal RM, Klonoff DC, Garg SK, Bode BW, Meredith M, Slover RH, et al. Threshold-based insulin-pump interruption for reduction of hypoglycemia. *N Engl J Med*. 2013;369(3):224-32.
14. Thabit H, Hovorka R. Coming of age: the artificial pancreas for type 1 diabetes. *Diabetologia*. 2016;59(9):1795-805.
15. Hovorka R. Closed-loop insulin delivery: from bench to clinical practice. *Nat Rev Endocrinol*. 2011;7(7):385-95.
16. FDA News Release. FDA approves first automated insulin delivery device for type 1 diabetes. <http://www.fda.gov/NewsEvents/Newsroom/PressAnnouncements/ucm522974.htm> (last accessed 26 July 2018) [
17. Kropff J, Del Favero S, Place J, Toffanin C, Visentin R, Monaro M, et al. 2 month evening and night closed-loop glucose control in patients with type 1 diabetes under free-living conditions: a randomised crossover trial. *Lancet Diabetes Endocrinol*. 2015;3(12):939-47.
18. Hovorka R, Allen JM, Elleri D, Chassin LJ, Harris J, Xing D, et al. Manual closed-loop insulin delivery in children and adolescents with type 1 diabetes: a phase 2 randomised crossover trial. *Lancet*. 2010;375(9716):743-51.
19. Elleri D, Allen JM, Kumareswaran K, Leelarathna L, Nodale M, Caldwell K, et al. Closed-loop basal insulin delivery over 36 hours in adolescents with type 1 diabetes: randomized clinical trial. *Diabetes Care*. 2013;36(4):838-44.

- 1
- 2
- 3 20. Nimri R, Danne T, Kordonouri O, Atlas E, Bratina N, Biester T, et al. The "Glucositter"  
4 overnight automated closed loop system for type 1 diabetes: a randomized crossover trial.  
5 *Pediatr Diabetes*. 2013;14(3):159-67.
- 6 21. Hovorka R, Elleri D, Thabit H, Allen JM, Leelarathna L, El-Khairi R, et al. Overnight  
7 Closed Loop Insulin Delivery in Young People with Type 1 Diabetes: A Free-Living  
8 Randomised Clinical Trial. *Diabetes Care*. 2014;37(5):1204-11.
- 9 22. Thabit H, Tauschmann M, Allen JM, Leelarathna L, Hartnell S, Wilinska ME, et al.  
10 Home Use of an Artificial Beta Cell in Type 1 Diabetes. *N Engl J Med*. 2015;373(22):2129-  
11 40.
- 12 23. Nimri R, Muller I, Atlas E, Miller S, Kordonouri O, Bratina N, et al. Night glucose  
13 control with MD-Logic artificial pancreas in home setting: a single blind, randomized  
14 crossover trial-interim analysis. *Pediatr Diabetes*. 2014;15(2):91-9.
- 15 24. Tauschmann M, Allen JM, Wilinska ME, Thabit H, Stewart Z, Cheng P, et al. Day-  
16 and-Night Hybrid Closed-Loop Insulin Delivery in Adolescents With Type 1 Diabetes: A Free-  
17 Living, Randomized Clinical Trial. *Diabetes Care*. 2016;Jan 6 [Epub ahead of print].
- 18 25. Leelarathna L, Dellweg S, Mader JK, Allen JM, Benesch C, Doll W, et al. Day and  
19 night home closed-loop insulin delivery in adults with type 1 diabetes: three-center  
20 randomized crossover study. *Diabetes Care*. 2014;37(7):1931-7.
- 21 26. Thabit H, Lubina-Solomon A, Stadler M, Leelarathna L, Walkinshaw E, Pernet A, et  
22 al. Home use of closed-loop insulin delivery for overnight glucose control in adults with type 1  
23 diabetes: a 4-week, multicentre, randomised crossover study. *Lancet Diabetes Endocrinol*.  
24 2014;2(9):701-9.
- 25 27. Barnard KD, Wysocki T, Allen JM, Elleri D, Thabit H, Leelarathna L, et al. Closing the  
26 loop overnight at home setting: psychosocial impact for adolescents with type 1 diabetes and  
27 their parents. *BMJ Open Diabetes Res Care*. 2014;2(1):e000025.
- 28 28. Bekiari E, Kitsios K, Thabit H, Tauschmann M, Athanasiadou E, Karagiannis T, et al.  
29 Artificial pancreas treatment for outpatients with type 1 diabetes: systematic review and  
30 meta-analysis. *Bmj*. 2018;361:k1310.
- 31 29. Wilinska ME, Chassin LJ, Acerini CL, Allen JM, Dunger DB, Hovorka R. Simulation  
32 environment to evaluate closed-loop insulin delivery systems in type 1 diabetes. *J Diabetes  
33 Sci Technol*. 2010;4(1):132-44.
- 34 30. Boughton CK, Hovorka R. Is an artificial pancreas (closed-loop system) for Type 1  
35 diabetes effective? *Diabet Med*. 2018.
- 36 31. Stevens K. Developing a descriptive system for a new preference-based measure of  
37 health-related quality of life for children. *Qual Life Res*. 2009;18(8):1105-13.
- 38 32. Wille N, Badia X, Bonsel G, Burstrom K, Cavrini G, Devlin N, et al. Development of  
39 the EQ-5D-Y: a child-friendly version of the EQ-5D. *Qual Life Res*. 2010;19(6):875-86.
- 40 33. Effectiveness of continuous glucose monitoring in a clinical care environment:  
41 evidence from the Juvenile Diabetes Research Foundation continuous glucose monitoring  
42 (JDRF-CGM) trial. *Diabetes Care*. 2010;33(1):17-22.
- 43 34. World Health Organization. Definition, Diagnosis and Classification of Diabetes  
44 Mellitus and its Complications. Part 1: Diagnosis and Classification of Diabetes Mellitus.  
45 WHO/NCD/NCS/99.2. Geneva, (1999).
- 46
- 47
- 48
- 49
- 50
- 51
- 52
- 53
- 54
- 55
- 56
- 57
- 58
- 59
- 60

**Figure 1.** Study flow chart

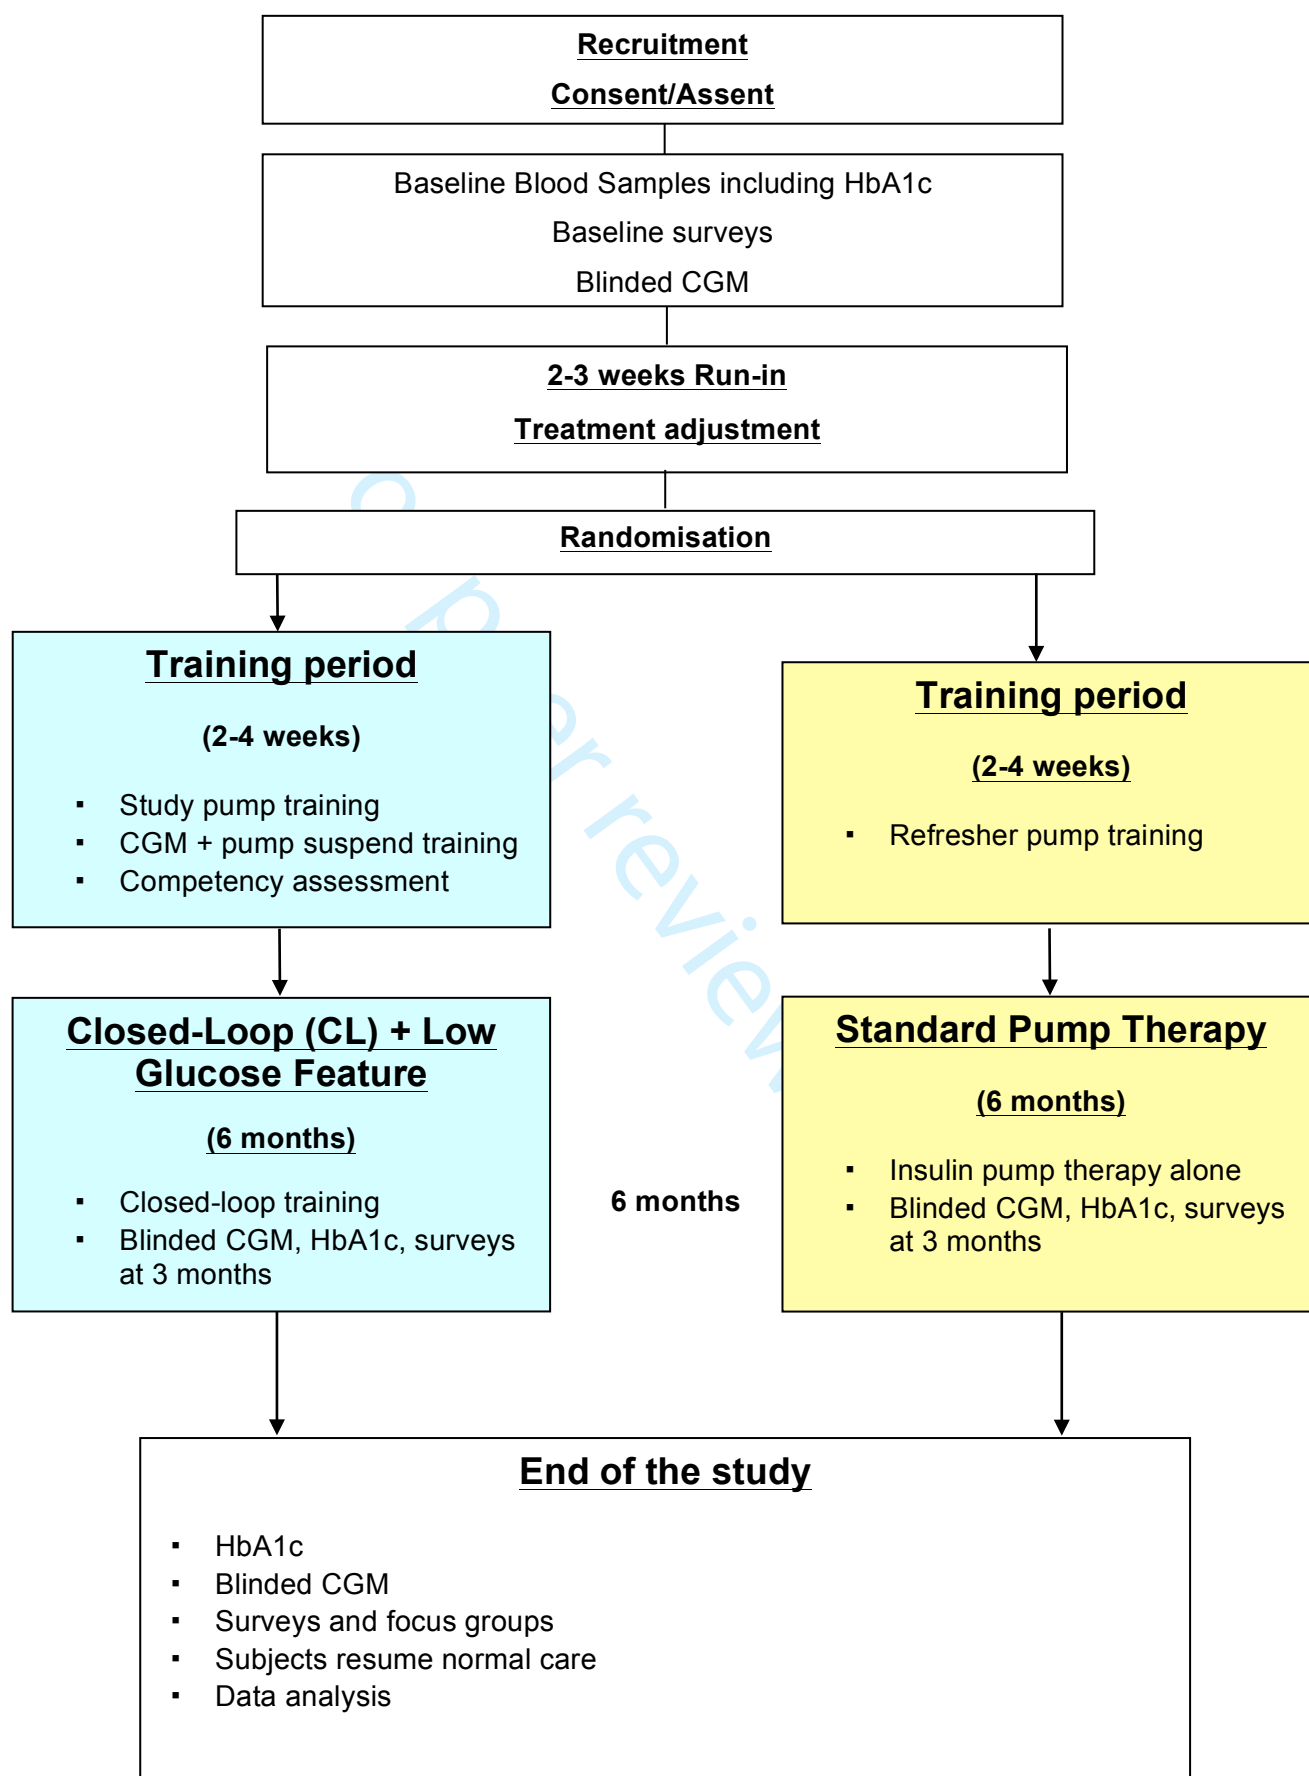



**Figure 2.** FlorenceM closed-loop system prototype

The system consists of a continuous glucose monitoring transmitter with Guardian 3 sensor (Medtronic), an insulin pump (modified 640G pump, Medtronic), and an Android smartphone running the control algorithm (Cambridge).

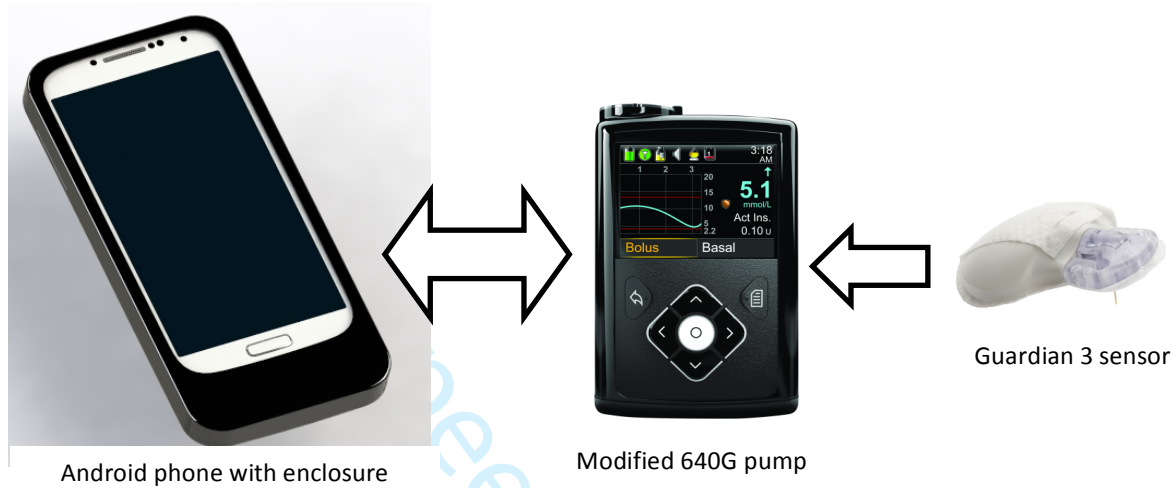

# Reporting checklist for protocol of a clinical trial.

Based on the SPIRIT guidelines.

## Instructions to authors

Complete this checklist by entering the page numbers from your manuscript where readers will find each of the items listed below.

Your article may not currently address all the items on the checklist. Please modify your text to include the missing information. If you are certain that an item does not apply, please write "n/a" and provide a short explanation.

Upload your completed checklist as an extra file when you submit to a journal.

In your methods section, say that you used the SPIRIT reporting guidelines, and cite them as:

Chan A-W, Tetzlaff JM, Altman DG, Laupacis A, Gøtzsche PC, Krleža-Jerić K, Hróbjartsson A, Mann H, Dickersin K, Berlin J, Doré C, Parulekar W, Summerskill W, Groves T, Schulz K, Sox H, Rockhold FW, Rennie D, Moher D. SPIRIT 2013 Statement: Defining standard protocol items for clinical trials. *Ann Intern Med.* 2013;158(3):200-207

|                    |                     | Reporting Item                                                                                               | Page Number |
|--------------------|---------------------|--------------------------------------------------------------------------------------------------------------|-------------|
| Title              | <a href="#">#1</a>  | Descriptive title identifying the study design, population, interventions, and, if applicable, trial acronym | 1           |
| Trial registration | <a href="#">#2a</a> | Trial identifier and registry name. If not yet registered, name of intended registry                         | 2           |

|    |                     |                     |                                                  |
|----|---------------------|---------------------|--------------------------------------------------|
| 1  |                     |                     | NCT02925299                                      |
| 2  |                     |                     |                                                  |
| 3  |                     |                     | (ClinicalTrials.gov)                             |
| 4  |                     |                     |                                                  |
| 5  |                     |                     |                                                  |
| 6  |                     |                     | DAN05                                            |
| 7  |                     |                     |                                                  |
| 8  |                     |                     |                                                  |
| 9  |                     |                     |                                                  |
| 10 | Trial registration: | <a href="#">#2b</a> | All items from the World Health Organization     |
| 11 |                     |                     |                                                  |
| 12 | data set            |                     | Trial Registration Data Set                      |
| 13 |                     |                     |                                                  |
| 14 |                     |                     |                                                  |
| 15 | Protocol version    | <a href="#">#3</a>  | Date and version identifier                      |
| 16 |                     |                     | 16.04.2018 (6.0)                                 |
| 17 |                     |                     |                                                  |
| 18 | Funding             | <a href="#">#4</a>  | Sources and types of financial, material, and    |
| 19 |                     |                     | other support                                    |
| 20 |                     |                     | 14                                               |
| 21 |                     |                     |                                                  |
| 22 |                     |                     |                                                  |
| 23 | Roles and           | <a href="#">#5a</a> | Names, affiliations, and roles of protocol       |
| 24 |                     |                     | contributors                                     |
| 25 | responsibilities:   |                     |                                                  |
| 26 |                     |                     |                                                  |
| 27 | contributorship     |                     |                                                  |
| 28 |                     |                     |                                                  |
| 29 |                     |                     |                                                  |
| 30 |                     |                     |                                                  |
| 31 | Roles and           | <a href="#">#5b</a> | Name and contact information for the trial       |
| 32 |                     |                     | sponsor                                          |
| 33 | responsibilities:   |                     |                                                  |
| 34 |                     |                     | NCT02925299                                      |
| 35 | sponsor contact     |                     | (ClinicalTrials.gov)                             |
| 36 |                     |                     |                                                  |
| 37 | information         |                     |                                                  |
| 38 |                     |                     |                                                  |
| 39 |                     |                     |                                                  |
| 40 |                     |                     |                                                  |
| 41 | Roles and           | <a href="#">#5c</a> | Role of study sponsor and funders, if any, in    |
| 42 |                     |                     | study design; collection, management,            |
| 43 | responsibilities:   |                     |                                                  |
| 44 |                     |                     | NCT02925299                                      |
| 45 | sponsor and funder  |                     | (ClinicalTrials.gov)                             |
| 46 |                     |                     |                                                  |
| 47 |                     |                     | analysis, and interpretation of data; writing of |
| 48 |                     |                     | the report; and the decision to submit the       |
| 49 |                     |                     | report for publication, including whether they   |
| 50 |                     |                     | will have ultimate authority over any of these   |
| 51 |                     |                     | activities                                       |
| 52 |                     |                     |                                                  |
| 53 |                     |                     |                                                  |
| 54 |                     |                     |                                                  |
| 55 |                     |                     |                                                  |
| 56 |                     |                     |                                                  |
| 57 |                     |                     |                                                  |
| 58 |                     |                     |                                                  |
| 59 |                     |                     |                                                  |
| 60 |                     |                     |                                                  |

|    |                      |                     |                                                     |                   |
|----|----------------------|---------------------|-----------------------------------------------------|-------------------|
| 1  | Roles and            | <a href="#">#5d</a> | Composition, roles, and responsibilities of the     | See supplementary |
| 2  |                      |                     |                                                     |                   |
| 3  | responsibilities:    |                     | coordinating centre, steering committee,            | file              |
| 4  |                      |                     |                                                     |                   |
| 5  | committees           |                     | endpoint adjudication committee, data               |                   |
| 6  |                      |                     |                                                     |                   |
| 7  |                      |                     | management team, and other individuals or           |                   |
| 8  |                      |                     |                                                     |                   |
| 9  |                      |                     | groups overseeing the trial, if applicable (see     |                   |
| 10 |                      |                     |                                                     |                   |
| 11 |                      |                     | Item 21a for data monitoring committee)             |                   |
| 12 |                      |                     |                                                     |                   |
| 13 |                      |                     |                                                     |                   |
| 14 |                      |                     |                                                     |                   |
| 15 | Background and       | <a href="#">#6a</a> | Description of research question and                | 4                 |
| 16 |                      |                     |                                                     |                   |
| 17 | rationale            |                     | justification for undertaking the trial, including  |                   |
| 18 |                      |                     |                                                     |                   |
| 19 |                      |                     | summary of relevant studies (published and          |                   |
| 20 |                      |                     |                                                     |                   |
| 21 |                      |                     | unpublished) examining benefits and harms for       |                   |
| 22 |                      |                     |                                                     |                   |
| 23 |                      |                     | each intervention                                   |                   |
| 24 |                      |                     |                                                     |                   |
| 25 |                      |                     |                                                     |                   |
| 26 |                      |                     |                                                     |                   |
| 27 |                      |                     |                                                     |                   |
| 28 | Background and       | <a href="#">#6b</a> | Explanation for choice of comparators               | 4                 |
| 29 |                      |                     |                                                     |                   |
| 30 | rationale: choice of |                     |                                                     |                   |
| 31 |                      |                     |                                                     |                   |
| 32 | comparators          |                     |                                                     |                   |
| 33 |                      |                     |                                                     |                   |
| 34 |                      |                     |                                                     |                   |
| 35 | Objectives           | <a href="#">#7</a>  | Specific objectives or hypotheses                   | 2, 5              |
| 36 |                      |                     |                                                     |                   |
| 37 |                      |                     |                                                     |                   |
| 38 | Trial design         | <a href="#">#8</a>  | Description of trial design including type of trial | 5                 |
| 39 |                      |                     |                                                     |                   |
| 40 |                      |                     | (eg, parallel group, crossover, factorial, single   |                   |
| 41 |                      |                     |                                                     |                   |
| 42 |                      |                     | group), allocation ratio, and framework (eg,        |                   |
| 43 |                      |                     |                                                     |                   |
| 44 |                      |                     | superiority, equivalence, non-inferiority,          |                   |
| 45 |                      |                     |                                                     |                   |
| 46 |                      |                     | exploratory)                                        |                   |
| 47 |                      |                     |                                                     |                   |
| 48 |                      |                     |                                                     |                   |
| 49 |                      |                     |                                                     |                   |
| 50 | Study setting        | <a href="#">#9</a>  | Description of study settings (eg, community        | 5                 |
| 51 |                      |                     |                                                     |                   |
| 52 |                      |                     | clinic, academic hospital) and list of countries    |                   |
| 53 |                      |                     |                                                     |                   |
| 54 |                      |                     | where data will be collected. Reference to          |                   |
| 55 |                      |                     |                                                     |                   |
| 56 |                      |                     | where list of study sites can be obtained           |                   |
| 57 |                      |                     |                                                     |                   |
| 58 |                      |                     |                                                     |                   |
| 59 |                      |                     |                                                     |                   |
| 60 |                      |                     |                                                     |                   |

|    |                      |                      |                                                       |              |
|----|----------------------|----------------------|-------------------------------------------------------|--------------|
| 1  | Eligibility criteria | <a href="#">#10</a>  | Inclusion and exclusion criteria for participants.    | 15           |
| 2  |                      |                      |                                                       |              |
| 3  |                      |                      | If applicable, eligibility criteria for study centres |              |
| 4  |                      |                      | and individuals who will perform the                  |              |
| 5  |                      |                      | interventions (eg, surgeons, psychotherapists)        |              |
| 6  |                      |                      |                                                       |              |
| 7  |                      |                      |                                                       |              |
| 8  |                      |                      |                                                       |              |
| 9  |                      |                      |                                                       |              |
| 10 |                      |                      |                                                       |              |
| 11 | Interventions:       | <a href="#">#11a</a> | Interventions for each group with sufficient          | 5, 16, 17    |
| 12 |                      |                      |                                                       |              |
| 13 | description          |                      | detail to allow replication, including how and        |              |
| 14 |                      |                      | when they will be administered                        |              |
| 15 |                      |                      |                                                       |              |
| 16 |                      |                      |                                                       |              |
| 17 |                      |                      |                                                       |              |
| 18 |                      |                      |                                                       |              |
| 19 | Interventions:       | <a href="#">#11b</a> | Criteria for discontinuing or modifying allocated     | See protocol |
| 20 |                      |                      | interventions for a given trial participant (eg,      |              |
| 21 | modifications        |                      | drug dose change in response to harms,                |              |
| 22 |                      |                      | participant request, or improving / worsening         |              |
| 23 |                      |                      | disease)                                              |              |
| 24 |                      |                      |                                                       |              |
| 25 |                      |                      |                                                       |              |
| 26 |                      |                      |                                                       |              |
| 27 |                      |                      |                                                       |              |
| 28 |                      |                      |                                                       |              |
| 29 |                      |                      |                                                       |              |
| 30 |                      |                      |                                                       |              |
| 31 | Interventions:       | <a href="#">#11c</a> | Strategies to improve adherence to                    | N/A          |
| 32 |                      |                      |                                                       |              |
| 33 | adherence            |                      | intervention protocols, and any procedures for        |              |
| 34 |                      |                      | monitoring adherence (eg, drug tablet return;         |              |
| 35 |                      |                      | laboratory tests)                                     |              |
| 36 |                      |                      |                                                       |              |
| 37 |                      |                      |                                                       |              |
| 38 |                      |                      |                                                       |              |
| 39 |                      |                      |                                                       |              |
| 40 |                      |                      |                                                       |              |
| 41 | Interventions:       | <a href="#">#11d</a> | Relevant concomitant care and interventions           | 7            |
| 42 |                      |                      |                                                       |              |
| 43 | concomitant care     |                      | that are permitted or prohibited during the trial     |              |
| 44 |                      |                      |                                                       |              |
| 45 |                      |                      |                                                       |              |
| 46 | Outcomes             | <a href="#">#12</a>  | Primary, secondary, and other outcomes,               | 9, 10        |
| 47 |                      |                      |                                                       |              |
| 48 |                      |                      | including the specific measurement variable           |              |
| 49 |                      |                      | (eg, systolic blood pressure), analysis metric        |              |
| 50 |                      |                      | (eg, change from baseline, final value, time to       |              |
| 51 |                      |                      | event), method of aggregation (eg, median,            |              |
| 52 |                      |                      | proportion), and time point for each outcome.         |              |
| 53 |                      |                      |                                                       |              |
| 54 |                      |                      |                                                       |              |
| 55 |                      |                      |                                                       |              |
| 56 |                      |                      |                                                       |              |
| 57 |                      |                      |                                                       |              |
| 58 |                      |                      |                                                       |              |
| 59 |                      |                      |                                                       |              |
| 60 |                      |                      |                                                       |              |

1 Explanation of the clinical relevance of chosen  
 2 efficacy and harm outcomes is strongly  
 3 recommended  
 4  
 5  
 6  
 7

|    |                      |                      |                                                   |              |
|----|----------------------|----------------------|---------------------------------------------------|--------------|
| 8  | Participant timeline | <a href="#">#13</a>  | Time schedule of enrolment, interventions         | See Figure 1 |
| 9  |                      |                      | (including any run-ins and washouts),             |              |
| 10 |                      |                      | assessments, and visits for participants. A       |              |
| 11 |                      |                      | schematic diagram is highly recommended           |              |
| 12 |                      |                      | (see Figure)                                      |              |
| 13 |                      |                      |                                                   |              |
| 14 |                      |                      |                                                   |              |
| 15 |                      |                      |                                                   |              |
| 16 |                      |                      |                                                   |              |
| 17 |                      |                      |                                                   |              |
| 18 |                      |                      |                                                   |              |
| 19 |                      |                      |                                                   |              |
| 20 | Sample size          | <a href="#">#14</a>  | Estimated number of participants needed to        | 12           |
| 21 |                      |                      | achieve study objectives and how it was           |              |
| 22 |                      |                      | determined, including clinical and statistical    |              |
| 23 |                      |                      | assumptions supporting any sample size            |              |
| 24 |                      |                      | calculations                                      |              |
| 25 |                      |                      |                                                   |              |
| 26 |                      |                      |                                                   |              |
| 27 |                      |                      |                                                   |              |
| 28 |                      |                      |                                                   |              |
| 29 |                      |                      |                                                   |              |
| 30 |                      |                      |                                                   |              |
| 31 |                      |                      |                                                   |              |
| 32 | Recruitment          | <a href="#">#15</a>  | Strategies for achieving adequate participant     | 5            |
| 33 |                      |                      | enrolment to reach target sample size             |              |
| 34 |                      |                      |                                                   |              |
| 35 |                      |                      |                                                   |              |
| 36 |                      |                      |                                                   |              |
| 37 |                      |                      |                                                   |              |
| 38 | Allocation:          | <a href="#">#16a</a> | Method of generating the allocation sequence      | 6            |
| 39 | sequence             |                      | (eg, computer-generated random numbers),          |              |
| 40 |                      |                      | and list of any factors for stratification. To    |              |
| 41 | generation           |                      | reduce predictability of a random sequence,       |              |
| 42 |                      |                      | details of any planned restriction (eg, blocking) |              |
| 43 |                      |                      | should be provided in a separate document         |              |
| 44 |                      |                      | that is unavailable to those who enrol            |              |
| 45 |                      |                      | participants or assign interventions              |              |
| 46 |                      |                      |                                                   |              |
| 47 |                      |                      |                                                   |              |
| 48 |                      |                      |                                                   |              |
| 49 |                      |                      |                                                   |              |
| 50 |                      |                      |                                                   |              |
| 51 |                      |                      |                                                   |              |
| 52 |                      |                      |                                                   |              |
| 53 |                      |                      |                                                   |              |
| 54 |                      |                      |                                                   |              |
| 55 |                      |                      |                                                   |              |
| 56 |                      |                      |                                                   |              |
| 57 |                      |                      |                                                   |              |
| 58 |                      |                      |                                                   |              |
| 59 |                      |                      |                                                   |              |
| 60 |                      |                      |                                                   |              |

|    |                     |                      |                                                    |              |
|----|---------------------|----------------------|----------------------------------------------------|--------------|
| 1  | Allocation          | <a href="#">#16b</a> | Mechanism of implementing the allocation           | 6            |
| 2  |                     |                      |                                                    |              |
| 3  | concealment         |                      | sequence (eg, central telephone; sequentially      |              |
| 4  |                     |                      | numbered, opaque, sealed envelopes),               |              |
| 5  | mechanism           |                      | describing any steps to conceal the sequence       |              |
| 6  |                     |                      | until interventions are assigned                   |              |
| 7  |                     |                      |                                                    |              |
| 8  |                     |                      |                                                    |              |
| 9  |                     |                      |                                                    |              |
| 10 |                     |                      |                                                    |              |
| 11 |                     |                      |                                                    |              |
| 12 |                     |                      |                                                    |              |
| 13 | Allocation:         | <a href="#">#16c</a> | Who will generate the allocation sequence,         |              |
| 14 |                     |                      | who will enrol participants, and who will assign   |              |
| 15 | implementation      |                      | participants to interventions                      |              |
| 16 |                     |                      |                                                    |              |
| 17 |                     |                      |                                                    |              |
| 18 |                     |                      |                                                    |              |
| 19 |                     |                      |                                                    |              |
| 20 |                     |                      |                                                    |              |
| 21 | Blinding (masking)  | <a href="#">#17a</a> | Who will be blinded after assignment to            | N/A          |
| 22 |                     |                      | interventions (eg, trial participants, care        |              |
| 23 |                     |                      | providers, outcome assessors, data analysts),      |              |
| 24 |                     |                      | and how                                            |              |
| 25 |                     |                      |                                                    |              |
| 26 |                     |                      |                                                    |              |
| 27 |                     |                      |                                                    |              |
| 28 |                     |                      |                                                    |              |
| 29 |                     |                      |                                                    |              |
| 30 |                     |                      |                                                    |              |
| 31 | Blinding (masking): | <a href="#">#17b</a> | If blinded, circumstances under which              | N/A          |
| 32 |                     |                      | unblinding is permissible, and procedure for       |              |
| 33 | emergency           |                      | revealing a participant's allocated intervention   |              |
| 34 |                     |                      | during the trial                                   |              |
| 35 | unblinding          |                      |                                                    |              |
| 36 |                     |                      |                                                    |              |
| 37 |                     |                      |                                                    |              |
| 38 |                     |                      |                                                    |              |
| 39 |                     |                      |                                                    |              |
| 40 |                     |                      |                                                    |              |
| 41 | Data collection     | <a href="#">#18a</a> | Plans for assessment and collection of             | See protocol |
| 42 |                     |                      | outcome, baseline, and other trial data,           |              |
| 43 | plan                |                      | including any related processes to promote         |              |
| 44 |                     |                      | data quality (eg, duplicate measurements,          |              |
| 45 |                     |                      | training of assessors) and a description of        |              |
| 46 |                     |                      | study instruments (eg, questionnaires,             |              |
| 47 |                     |                      | laboratory tests) along with their reliability and |              |
| 48 |                     |                      | validity, if known. Reference to where data        |              |
| 49 |                     |                      |                                                    |              |
| 50 |                     |                      |                                                    |              |
| 51 |                     |                      |                                                    |              |
| 52 |                     |                      |                                                    |              |
| 53 |                     |                      |                                                    |              |
| 54 |                     |                      |                                                    |              |
| 55 |                     |                      |                                                    |              |
| 56 |                     |                      |                                                    |              |
| 57 |                     |                      |                                                    |              |
| 58 |                     |                      |                                                    |              |
| 59 |                     |                      |                                                    |              |
| 60 |                     |                      |                                                    |              |

|    |                      |                                                                    |              |
|----|----------------------|--------------------------------------------------------------------|--------------|
| 1  |                      | collection forms can be found, if not in the                       |              |
| 2  |                      |                                                                    |              |
| 3  |                      | protocol                                                           |              |
| 4  |                      |                                                                    |              |
| 5  |                      |                                                                    |              |
| 6  | Data collection      | <a href="#">#18b</a> Plans to promote participant retention and    | See protocol |
| 7  |                      |                                                                    |              |
| 8  | plan: retention      | complete follow-up, including list of any                          |              |
| 9  |                      |                                                                    |              |
| 10 |                      | outcome data to be collected for participants                      |              |
| 11 |                      |                                                                    |              |
| 12 |                      | who discontinue or deviate from intervention                       |              |
| 13 |                      |                                                                    |              |
| 14 |                      | protocols                                                          |              |
| 15 |                      |                                                                    |              |
| 16 |                      |                                                                    |              |
| 17 |                      |                                                                    |              |
| 18 | Data management      | <a href="#">#19</a> Plans for data entry, coding, security, and    | 12           |
| 19 |                      |                                                                    |              |
| 20 |                      | storage, including any related processes to                        |              |
| 21 |                      |                                                                    |              |
| 22 |                      | promote data quality (eg, double data entry;                       |              |
| 23 |                      |                                                                    |              |
| 24 |                      | range checks for data values). Reference to                        |              |
| 25 |                      |                                                                    |              |
| 26 |                      | where details of data management procedures                        |              |
| 27 |                      |                                                                    |              |
| 28 |                      | can be found, if not in the protocol                               |              |
| 29 |                      |                                                                    |              |
| 30 |                      |                                                                    |              |
| 31 |                      |                                                                    |              |
| 32 | Statistics:          | <a href="#">#20a</a> Statistical methods for analysing primary and | 9            |
| 33 |                      |                                                                    |              |
| 34 | outcomes             | secondary outcomes. Reference to where                             |              |
| 35 |                      |                                                                    |              |
| 36 |                      | other details of the statistical analysis plan can                 |              |
| 37 |                      |                                                                    |              |
| 38 |                      | be found, if not in the protocol                                   |              |
| 39 |                      |                                                                    |              |
| 40 |                      |                                                                    |              |
| 41 |                      |                                                                    |              |
| 42 | Statistics:          | <a href="#">#20b</a> Methods for any additional analyses (eg,      | 11           |
| 43 |                      |                                                                    |              |
| 44 | additional analyses  | subgroup and adjusted analyses)                                    |              |
| 45 |                      |                                                                    |              |
| 46 |                      |                                                                    |              |
| 47 |                      |                                                                    |              |
| 48 | Statistics: analysis | <a href="#">#20c</a> Definition of analysis population relating to | 11           |
| 49 |                      |                                                                    |              |
| 50 | population and       | protocol non-adherence (eg, as randomised                          |              |
| 51 |                      |                                                                    |              |
| 52 | missing data         | analysis), and any statistical methods to handle                   |              |
| 53 |                      |                                                                    |              |
| 54 |                      | missing data (eg, multiple imputation)                             |              |
| 55 |                      |                                                                    |              |
| 56 |                      |                                                                    |              |
| 57 |                      |                                                                    |              |
| 58 |                      |                                                                    |              |
| 59 |                      |                                                                    |              |
| 60 |                      |                                                                    |              |



|    |                  |                      |                                                     |       |
|----|------------------|----------------------|-----------------------------------------------------|-------|
| 1  | Data monitoring: | <a href="#">#21a</a> | Composition of data monitoring committee            | 12    |
| 2  |                  |                      |                                                     |       |
| 3  | formal committee |                      | (DMC); summary of its role and reporting            |       |
| 4  |                  |                      | structure; statement of whether it is               |       |
| 5  |                  |                      | independent from the sponsor and competing          |       |
| 6  |                  |                      | interests; and reference to where further details   |       |
| 7  |                  |                      | about its charter can be found, if not in the       |       |
| 8  |                  |                      | protocol. Alternatively, an explanation of why a    |       |
| 9  |                  |                      | DMC is not needed                                   |       |
| 10 |                  |                      |                                                     |       |
| 11 | Data monitoring: | <a href="#">#21b</a> | Description of any interim analyses and             | 11    |
| 12 |                  |                      |                                                     |       |
| 13 | interim analysis |                      | stopping guidelines, including who will have        |       |
| 14 |                  |                      | access to these interim results and make the        |       |
| 15 |                  |                      | final decision to terminate the trial               |       |
| 16 |                  |                      |                                                     |       |
| 17 |                  |                      |                                                     |       |
| 18 |                  |                      |                                                     |       |
| 19 |                  |                      |                                                     |       |
| 20 | Harms            | <a href="#">#22</a>  | Plans for collecting, assessing, reporting, and     | 12-13 |
| 21 |                  |                      | managing solicited and spontaneously reported       |       |
| 22 |                  |                      | adverse events and other unintended effects of      |       |
| 23 |                  |                      | trial interventions or trial conduct                |       |
| 24 |                  |                      |                                                     |       |
| 25 |                  |                      |                                                     |       |
| 26 |                  |                      |                                                     |       |
| 27 |                  |                      |                                                     |       |
| 28 |                  |                      |                                                     |       |
| 29 |                  |                      |                                                     |       |
| 30 | Auditing         | <a href="#">#23</a>  | Frequency and procedures for auditing trial         | 12    |
| 31 |                  |                      | conduct, if any, and whether the process will       |       |
| 32 |                  |                      | be independent from investigators and the           |       |
| 33 |                  |                      | sponsor                                             |       |
| 34 |                  |                      |                                                     |       |
| 35 |                  |                      |                                                     |       |
| 36 |                  |                      |                                                     |       |
| 37 |                  |                      |                                                     |       |
| 38 |                  |                      |                                                     |       |
| 39 |                  |                      |                                                     |       |
| 40 | Research ethics  | <a href="#">#24</a>  | Plans for seeking research ethics committee /       | 13    |
| 41 |                  |                      | institutional review board (REC / IRB) approval     |       |
| 42 | approval         |                      |                                                     |       |
| 43 |                  |                      |                                                     |       |
| 44 |                  |                      |                                                     |       |
| 45 |                  |                      |                                                     |       |
| 46 |                  |                      |                                                     |       |
| 47 |                  |                      |                                                     |       |
| 48 |                  |                      |                                                     |       |
| 49 |                  |                      |                                                     |       |
| 50 | Protocol         | <a href="#">#25</a>  | Plans for communicating important protocol          | 13    |
| 51 |                  |                      |                                                     |       |
| 52 | amendments       |                      | modifications (eg, changes to eligibility criteria, |       |
| 53 |                  |                      |                                                     |       |
| 54 |                  |                      |                                                     |       |
| 55 |                  |                      |                                                     |       |
| 56 |                  |                      |                                                     |       |
| 57 |                  |                      |                                                     |       |
| 58 |                  |                      |                                                     |       |
| 59 |                  |                      |                                                     |       |
| 60 |                  |                      |                                                     |       |

|    |                    |                                                                       |     |
|----|--------------------|-----------------------------------------------------------------------|-----|
| 1  |                    | outcomes, analyses) to relevant parties (eg,                          |     |
| 2  |                    | investigators, REC / IRBs, trial participants,                        |     |
| 3  |                    | trial registries, journals, regulators)                               |     |
| 4  |                    |                                                                       |     |
| 5  |                    |                                                                       |     |
| 6  |                    |                                                                       |     |
| 7  |                    |                                                                       |     |
| 8  | Consent or assent  | <a href="#">#26a</a> Who will obtain informed consent or assent       | 5   |
| 9  |                    | from potential trial participants or authorised                       |     |
| 10 |                    | surrogates, and how (see Item 32)                                     |     |
| 11 |                    |                                                                       |     |
| 12 |                    |                                                                       |     |
| 13 |                    |                                                                       |     |
| 14 |                    |                                                                       |     |
| 15 | Consent or assent: | <a href="#">#26b</a> Additional consent provisions for collection and | N/A |
| 16 | ancillary studies  | use of participant data and biological                                |     |
| 17 |                    | specimens in ancillary studies, if applicable                         |     |
| 18 |                    |                                                                       |     |
| 19 |                    |                                                                       |     |
| 20 |                    |                                                                       |     |
| 21 |                    |                                                                       |     |
| 22 |                    |                                                                       |     |
| 23 | Confidentiality    | <a href="#">#27</a> How personal information about potential and      | 12  |
| 24 |                    | enrolled participants will be collected, shared,                      |     |
| 25 |                    | and maintained in order to protect                                    |     |
| 26 |                    | confidentiality before, during, and after the trial                   |     |
| 27 |                    |                                                                       |     |
| 28 |                    |                                                                       |     |
| 29 |                    |                                                                       |     |
| 30 |                    |                                                                       |     |
| 31 |                    |                                                                       |     |
| 32 |                    |                                                                       |     |
| 33 | Declaration of     | <a href="#">#28</a> Financial and other competing interests for       | 14  |
| 34 | interests          | principal investigators for the overall trial and                     |     |
| 35 |                    | each study site                                                       |     |
| 36 |                    |                                                                       |     |
| 37 |                    |                                                                       |     |
| 38 |                    |                                                                       |     |
| 39 |                    |                                                                       |     |
| 40 |                    |                                                                       |     |
| 41 | Data access        | <a href="#">#29</a> Statement of who will have access to the final    | 12  |
| 42 |                    | trial dataset, and disclosure of contractual                          |     |
| 43 |                    | agreements that limit such access for                                 |     |
| 44 |                    | investigators                                                         |     |
| 45 |                    |                                                                       |     |
| 46 |                    |                                                                       |     |
| 47 |                    |                                                                       |     |
| 48 |                    |                                                                       |     |
| 49 |                    |                                                                       |     |
| 50 |                    |                                                                       |     |
| 51 | Ancillary and post | <a href="#">#30</a> Provisions, if any, for ancillary and post-trial  | N/A |
| 52 | trial care         | care, and for compensation to those who suffer                        |     |
| 53 |                    | harm from trial participation                                         |     |
| 54 |                    |                                                                       |     |
| 55 |                    |                                                                       |     |
| 56 |                    |                                                                       |     |
| 57 |                    |                                                                       |     |
| 58 |                    |                                                                       |     |
| 59 |                    |                                                                       |     |
| 60 |                    |                                                                       |     |

|    |                       |                      |                                                  |                   |
|----|-----------------------|----------------------|--------------------------------------------------|-------------------|
| 1  | Dissemination         | <a href="#">#31a</a> | Plans for investigators and sponsor to           | 9, 13             |
| 2  |                       |                      |                                                  |                   |
| 3  | policy: trial results |                      | communicate trial results to participants,       |                   |
| 4  |                       |                      | healthcare professionals, the public, and other  |                   |
| 5  |                       |                      | relevant groups (eg, via publication, reporting  |                   |
| 6  |                       |                      | in results databases, or other data sharing      |                   |
| 7  |                       |                      | arrangements), including any publication         |                   |
| 8  |                       |                      | restrictions                                     |                   |
| 9  |                       |                      |                                                  |                   |
| 10 | Dissemination         | <a href="#">#31b</a> | Authorship eligibility guidelines and any        | See supplementary |
| 11 |                       |                      | intended use of professional writers             | file              |
| 12 | policy: authorship    |                      |                                                  |                   |
| 13 |                       |                      |                                                  |                   |
| 14 | Dissemination         | <a href="#">#31c</a> | Plans, if any, for granting public access to the |                   |
| 15 |                       |                      | full protocol, participant-level dataset, and    |                   |
| 16 | policy: reproducible  |                      | statistical code                                 |                   |
| 17 | research              |                      |                                                  |                   |
| 18 |                       |                      |                                                  |                   |
| 19 | Informed consent      | <a href="#">#32</a>  | Model consent form and other related             | Approved consents |
| 20 |                       |                      | documentation given to participants and          | for UK and USA    |
| 21 | materials             |                      | authorised surrogates                            | available         |
| 22 |                       |                      |                                                  |                   |
| 23 | Biological            | <a href="#">#33</a>  | Plans for collection, laboratory evaluation, and | 8                 |
| 24 |                       |                      | storage of biological specimens for genetic or   |                   |
| 25 | specimens             |                      | molecular analysis in the current trial and for  |                   |
| 26 |                       |                      | future use in ancillary studies, if applicable   |                   |
| 27 |                       |                      |                                                  |                   |

28 The SPIRIT checklist is distributed under the terms of the Creative Commons Attribution License CC-  
 29 BY-ND 3.0. This checklist can be completed online using <https://www.goodreports.org/>, a tool made  
 30 by the [EQUATOR Network](#) in collaboration with [Penelope.ai](#)

# BMJ Open

**Assessing the efficacy, safety and utility of 6 month day-and-night automated closed-loop insulin delivery under free living conditions compared to insulin pump therapy in children and adolescents with type 1 diabetes: an open-label, multi-centre, multi-national, single-period, randomised, parallel group study protocol**

|                               |                                                                                                                                                                                                                                                                                                                                                                                                                                                                                                                                                                                                                                                                                                                                                                                                                                                                                                                                                                                                                                                                                                                                                                                                                                                                                                                                                                                                                                                                                                                                                                                                                                                                                                                                                                                                                                                                                                                                                  |
|-------------------------------|--------------------------------------------------------------------------------------------------------------------------------------------------------------------------------------------------------------------------------------------------------------------------------------------------------------------------------------------------------------------------------------------------------------------------------------------------------------------------------------------------------------------------------------------------------------------------------------------------------------------------------------------------------------------------------------------------------------------------------------------------------------------------------------------------------------------------------------------------------------------------------------------------------------------------------------------------------------------------------------------------------------------------------------------------------------------------------------------------------------------------------------------------------------------------------------------------------------------------------------------------------------------------------------------------------------------------------------------------------------------------------------------------------------------------------------------------------------------------------------------------------------------------------------------------------------------------------------------------------------------------------------------------------------------------------------------------------------------------------------------------------------------------------------------------------------------------------------------------------------------------------------------------------------------------------------------------|
| Journal:                      | <i>BMJ Open</i>                                                                                                                                                                                                                                                                                                                                                                                                                                                                                                                                                                                                                                                                                                                                                                                                                                                                                                                                                                                                                                                                                                                                                                                                                                                                                                                                                                                                                                                                                                                                                                                                                                                                                                                                                                                                                                                                                                                                  |
| Manuscript ID                 | bmjopen-2018-027856.R1                                                                                                                                                                                                                                                                                                                                                                                                                                                                                                                                                                                                                                                                                                                                                                                                                                                                                                                                                                                                                                                                                                                                                                                                                                                                                                                                                                                                                                                                                                                                                                                                                                                                                                                                                                                                                                                                                                                           |
| Article Type:                 | Protocol                                                                                                                                                                                                                                                                                                                                                                                                                                                                                                                                                                                                                                                                                                                                                                                                                                                                                                                                                                                                                                                                                                                                                                                                                                                                                                                                                                                                                                                                                                                                                                                                                                                                                                                                                                                                                                                                                                                                         |
| Date Submitted by the Author: | 01-Mar-2019                                                                                                                                                                                                                                                                                                                                                                                                                                                                                                                                                                                                                                                                                                                                                                                                                                                                                                                                                                                                                                                                                                                                                                                                                                                                                                                                                                                                                                                                                                                                                                                                                                                                                                                                                                                                                                                                                                                                      |
| Complete List of Authors:     | <p>Musolino, Gianluca; Wellcome Trust-MRC Institute of Metabolic Science, University of Cambridge; University of Cambridge, Department of Paediatrics</p> <p>Allen, Janet; Wellcome Trust-MRC Institute of Metabolic Science, University of Cambridge ; University of Cambridge, Department of Paediatrics</p> <p>Hartnell, Sara; Cambridge University Hospitals NHS Foundation Trust, Department of Diabetes and Endocrinology</p> <p>Wilinska, Malgorzata; Wellcome Trust-MRC Institute of Metabolic Science, University of Cambridge ; University of Cambridge, Department of Paediatrics</p> <p>Tauschmann, Martin; Wellcome Trust-MRC Institute of Metabolic Science, University of Cambridge; Medical University of Vienna, Department of Pediatrics and Adolescent Medicine</p> <p>Boughton, Charlotte; Wellcome Trust-MRC Institute of Metabolic Science, University of Cambridge</p> <p>Campbell, Fiona; Leeds Children's Hospital, Department of Paediatric Diabetes</p> <p>Denvir, Louise; Nottingham University Hospitals NHS Trust, Department of Paediatric Diabetes and Endocrinology</p> <p>Trevelyan, Nicola; Southampton Children's Hospital, Southampton General Hospital</p> <p>Wadwa, Paul; Barbara Davis Center for Childhood Diabetes, University of Colorado</p> <p>DiMeglio, Linda; Indiana University School of Medicine, Division of Pediatric Endocrinology and Diabetology and Wells Center for Pediatric Research, Department of Pediatrics</p> <p>Buckingham, Bruce A.; Stanford University, Division of Pediatric Endocrinology</p> <p>Weinzimer, Stuart; Yale University, Department of Pediatrics</p> <p>Acerini, Carlo; Wellcome Trust-MRC Institute of Metabolic Science, University of Cambridge ; University of Cambridge, Department of Paediatrics</p> <p>Hood, Korey; Stanford University, Division of Pediatric Endocrinology</p> <p>Fox, Steven; University of Southern California, Department of</p> |

1  
2  
3  
4  
5  
6  
7  
8  
9  
10  
11  
12  
13  
14  
15  
16  
17  
18  
19  
20  
21  
22  
23  
24  
25  
26  
27  
28  
29  
30  
31  
32  
33  
34  
35  
36  
37  
38  
39  
40  
41  
42  
43  
44  
45  
46  
47  
48  
49  
50  
51  
52  
53  
54  
55  
56  
57  
58  
59  
60

|                                   |                                                                                                                                                                                                                                                                                                                                                                                                                            |
|-----------------------------------|----------------------------------------------------------------------------------------------------------------------------------------------------------------------------------------------------------------------------------------------------------------------------------------------------------------------------------------------------------------------------------------------------------------------------|
|                                   | Pharmaceutical and Health Economics, School of Pharmacy<br>Kollman, Craig; Jaeb Center for Health Research<br>Sibayan, Judy; Jaeb Center for Health Research<br>Borgman, Sarah; Jaeb Center for Health Research<br>Cheng, Peiyao; Jaeb Center for Health Research<br>Hovorka, Roman; Wellcome Trust-MRC Institute of Metabolic Science,<br>University of Cambridge ; University of Cambridge, Department of<br>Paediatrics |
| <b>Primary Subject Heading:</b>   | Paediatrics                                                                                                                                                                                                                                                                                                                                                                                                                |
| <b>Secondary Subject Heading:</b> | Diabetes and endocrinology                                                                                                                                                                                                                                                                                                                                                                                                 |
| <b>Keywords:</b>                  | Type 1 diabetes, Closed-loop, Artificial pancreas                                                                                                                                                                                                                                                                                                                                                                          |
|                                   |                                                                                                                                                                                                                                                                                                                                                                                                                            |

SCHOLARONE™  
Manuscripts

1  
2  
3 **Assessing the efficacy, safety and utility of 6 month day-and-night automated closed-**  
4 **loop insulin delivery under free living conditions compared to insulin pump therapy in**  
5 **children and adolescents with type 1 diabetes: an open-label, multi-centre, multi-**  
6 **national, single-period, randomised, parallel group study protocol**  
7

8  
9 <sup>1,3</sup>Musolino G, <sup>1,3</sup>Allen JM, <sup>2</sup>Hartnell S, <sup>1,3</sup>Wilinska ME, <sup>1,4</sup>Tauschmann M, <sup>1</sup>Boughton C,  
10 <sup>5</sup>Campbell F, <sup>6</sup>Denvir L, <sup>7</sup>Trevelyan N, <sup>8</sup>Wadwa RP, <sup>9</sup>DiMeglio LA, <sup>10</sup>Buckingham BA,  
11 <sup>11</sup>Weinzimer SA, <sup>1,3</sup>Acerini CL, <sup>10</sup>Hood KK, <sup>12</sup>Fox DS, <sup>13</sup>Kollman C, <sup>13</sup>Sibayan J, <sup>13</sup>Borgman S,  
12 <sup>13</sup>Cheng P, and <sup>1,3</sup>Hovorka R on behalf of DAN05 Consortium  
13  
14

15  
16 <sup>1</sup>Wellcome Trust-MRC Institute of Metabolic Science, University of Cambridge, Cambridge, UK

17 <sup>2</sup>Department of Diabetes & Endocrinology, Cambridge University Hospitals NHS Foundation Trust,  
18 Cambridge, UK

19 <sup>3</sup>Department of Paediatrics, University of Cambridge, Cambridge, UK

20 <sup>4</sup>Department of Pediatrics and Adolescent Medicine, Medical University of Vienna, Austria

21 <sup>5</sup>Leeds Children's Hospital, Department of Paediatric Diabetes, Leeds, UK

22 <sup>6</sup>Department of Paediatric Diabetes and Endocrinology, Nottingham University Hospitals NHS Trust,  
23 Nottingham, UK

24 <sup>7</sup>Southampton Children's Hospital, Southampton General Hospital, Southampton, UK

25 <sup>8</sup>Barbara Davis Center for Childhood Diabetes, University of Colorado, Aurora, CO, USA

26 <sup>9</sup>Division of Pediatric Endocrinology and Diabetology and Wells Center for Pediatric Research,  
27 Department of Pediatrics, Indiana University School of Medicine, Indianapolis, IN, USA

28 <sup>10</sup>Division of Pediatric Endocrinology, Stanford University, Stanford, CA, USA

29 <sup>11</sup>Department of Pediatrics, Yale University, New Haven, CT, USA

30 <sup>12</sup>Department of Pharmaceutical and Health Economics, School of Pharmacy, University of Southern  
31 California, Los Angeles, CA, USA

32 <sup>13</sup>Jaeb Center for Health Research, Tampa, FL, USA  
33  
34  
35  
36  
37  
38  
39  
40  
41  
42

### 43 **Correspondence**

44 Roman Hovorka, PhD

45 University of Cambridge Metabolic Research Laboratories and NIHR Cambridge Biomedical  
46 Research Centre,  
47

48 Wellcome Trust-MRC Institute of Metabolic Science, Box 289,  
49

50 Addenbrooke's Hospital, Hills Road, Cambridge CB2 0QQ, UK

51 Tel: +44 1223 762 862, fax: +44 1223 330 598, e-mail: rh347@cam.ac.uk  
52  
53  
54  
55

56 **Key Words:** Type 1 diabetes, Closed-loop, Artificial pancreas  
57  
58

59 **Word count abstract:** 299 (maximum 300)

60 **Word count paper:** 3993 (maximum 4000)

## ABSTRACT

### Introduction

Closed-loop systems titrate insulin based on sensor glucose levels, providing novel means to reduce the risk of hypoglycaemia while improving glycaemic control. We will assess effectiveness of 6-month day-and-night closed-loop insulin delivery compared to usual care (conventional or sensor-augmented pump therapy) in children and adolescents with type 1 diabetes.

### Methods and analysis

The trial adopts an open-label, multi-centre, multi-national (UK and USA), randomised, single-period, parallel design. Participants (n=130) are children and adolescents (age  $\geq 6$  and  $<19$  years) with type 1 diabetes for at least 1 year, and insulin pump use for at least 3 months with sub-optimal glycaemic control [glycated haemoglobin  $\geq 58$ mmol/mol (7.5%) and  $\leq 86$ mmol/mol (10%)]. After a 2-3 week run-in period, participants will be randomised to 6-month use of hybrid closed-loop insulin delivery, or to usual care. Analyses will be conducted on an intention to treat basis. The primary outcome is glycated haemoglobin at 6 months. Other key endpoints include time in the target glucose range (3.9 to 10mmol/l, 70 to 180mg/dl), mean sensor glucose, and time spent above and below target. Secondary outcomes include standard deviation and coefficient of variation of sensor glucose levels, time with sensor glucose levels  $<3.5$ mmol/l (63mg/dl) and  $<3.0$ mmol/l (54mg/dl), area under the curve of glucose  $<3.5$ mmol/l (63mg/dl), time with glucose levels  $>16.7$ mmol/l (300mg/dl), area under the curve of glucose  $>10.0$ mmol/l (180mg/dl), total, basal and bolus insulin dose, body mass index z-score, and blood pressure. Cognitive, emotional and behavioural characteristics of participants and caregivers and their responses to the closed-loop and clinical trial will be assessed. An incremental cost-effectiveness ratio (ICER) for closed-loop will be estimated.

### Ethics and dissemination

Cambridge South Research Ethics Committee and Jaeb Center for Health Research Institutional Review Office approved the study. The findings will be disseminated by peer-review publications and conference presentations.

**Trial registration** NCT02925299 (ClinicalTrials.gov).

### Strengths and limitations of this study

- The study adopts an open-label, multi-centre, multi-national, randomised, parallel design: it includes a large group of children and adolescents across wide geographical locations
- The trial adopts a 6-month follow-up period of hybrid closed-loop insulin delivery during unrestricted living
- Participants in the two study groups will have an equal number of study visits
- The study design excludes participants with recurrent incidents of severe hypoglycaemia or diabetic ketoacidosis during the previous 6 months, living alone, and those with glycated haemoglobin below 58mmol/mol (7.5%) and above 86mmol/mol (10%) and with high or very low daily insulin requirements (total daily insulin dose  $\geq 2\text{IU/kg/day}$  or  $< 15\text{IU/day}$ )
- All participants are already pump users, somewhat limiting generalizability



## INTRODUCTION

Type 1 diabetes is characterised by a deficiency of insulin caused by immunologically-mediated damage to pancreatic beta cells, leading to raised blood glucose levels. Diabetes is one of the most common metabolic conditions. It is estimated that in 2017 1,100,000 children and adolescents (0-19 years) worldwide had type 1 diabetes and that the number of newly diagnosed cases was over 130,000 (1). The incidence rate in children is increasing by approximately 3-4% per year with geographic differences (1). Earlier onset can result in diabetes complications appearing at a younger age, whilst dependence on lifelong insulin imposes a heavy burden on children, carers as well as health care systems.

Despite continuing progress, glycaemic control in children and adolescents with type 1 diabetes remains suboptimal (2). The achievement of recommended treatment goals is limited by the risk of hypoglycaemia. Even in those with the desired level of glycaemic control, non-physiological glucose excursions occur with periods of silent hyper- and hypoglycaemia (3, 4). Individuals have blunted counter-regulatory responses to hypoglycaemia impairing recovery and increasing the threat of future episodes (5). Recurrent episodes may lead to hypoglycaemic unawareness, increasing the risk of severe hypoglycaemia (6). Hypoglycaemia has psychological consequences including the fear of hypoglycaemia with resulting maladaptive coping behaviours, such as excessive eating or under-insulinising, that may negatively impact glycaemic control (7).

The development of continuous glucose monitoring has been a major advance (8-11). Sensor-augmented pumps combine real-time continuous glucose monitoring with insulin pump (12). Insulin pumps with low glucose suspend feature have been shown to reduce hypoglycaemia (13). These systems, however, overall provide little or no automation to adjust insulin delivery to match glucose excursions.

An artificial pancreas (a closed-loop system) adjusts insulin automatically and represents a realistic treatment option for type 1 diabetes (14). The closed-loop control algorithm translates, in real-time, sensor glucose levels received from the glucose monitoring device and computes the amount of insulin to be delivered by the coupled insulin pump. Hybrid closed-loop systems automatically titrate insulin delivery although the user manages insulin boosts at meal time (15). In 2017, the first closed-loop system entered clinical use in the USA (16).

Closed-loop systems may improve glycaemic control while reducing the risk of hypoglycaemia (17). They have been evaluated in children and adolescents under controlled laboratory conditions (18-20) and in home settings (21-24). Investigations in adults have also been conducted (22, 25, 26). Psychosocial assessments support acceptability and benefits of this therapeutic approach among children/adolescents and carers (27). Closed-loop systems are associated with increased time in near normoglycaemia and reduced time in hypoglycaemia and hyperglycaemia (28). So far, evaluations have been limited to 3 months (22).

The present study will assess the efficacy, safety, utility and acceptability of 6-month day-and-night hybrid closed-loop insulin delivery during unrestricted living in comparison to usual care in children and adolescents with type 1 diabetes.

## METHODS AND ANALYSIS

### Overview

This trial adopts an open-label, multi-centre, multi-national, single-period, randomised, parallel group design, involving a 6-month home study period during which day-and-night glucose levels will be managed either by a closed-loop system (intervention group) or by insulin pump therapy (control group) (Figure 1). We aim to recruit up to 150 children and adolescents aged  $\geq 6$  to  $< 19$  years with type 1 diabetes on insulin pump therapy (approximately equal proportion of those aged  $\geq 6$  to 12 years and 13 to  $< 19$  years, a minimum quota of 25% participants with baseline glycated haemoglobin  $> 69$  mmol/mol,  $> 8.5\%$ ). Inclusion and exclusion criteria are summarised in Table 1.

The University of Cambridge (UK) and Jaeb Center for Health Research (USA) are the coordinating centres. Clinical centres include:

- 1) Addenbrooke's Hospital, Cambridge, UK
- 2) Barbara Davis Center for Childhood Diabetes, Aurora, USA
- 3) Indiana University, Indianapolis, USA
- 4) Leeds Teaching Hospital, Leeds, UK
- 5) Nottingham Children's Hospital, Nottingham, UK
- 6) Southampton Children's Hospital, Southampton, UK
- 7) Stanford University, Stanford, California, USA
- 8) Yale University, New Haven, Connecticut, USA

Cognitive, emotional, and behavioural characteristics of participants and family members and their response to the closed-loop will be assessed gathering both quantitative (validated surveys) and qualitative data (focus groups). Written informed consent/assent will be obtained from all participants and guardians before any study-related activities.

### Study schedule

The study will comprise up to 8 visits and 6 telephone/email contacts (see Table 2 and Table 3). The maximum study duration is 8 months.

### Screening and baseline assessment

At screening, blood samples for full blood count, liver, thyroid function and anti-transglutaminase antibodies (with IgA levels if not done within previous 12 months) will be taken. Non-hypoglycaemia C-peptide, glucose and glycated haemoglobin will be measured and a urine pregnancy test in females of child-bearing potential will be performed. Surveys investigating participants' quality of life, psychosocial and cognitive functioning, and response to their current treatment will be distributed. Participants will be fitted with a blinded continuous glucose monitoring device (Libre Pro, Abbott Diabetes Care, Alameda, CA, USA) that will be worn during the run-in period at home for up to 14 days.

### Run-in period

During a 2-3 week run-in period, subjects will continue using their own insulin pump. Data obtained from blinded glucose sensors and pump downloads may be utilised for treatment

1  
2  
3 adjustments. The run-in period may be extended/repeated if no or limited sensor data is  
4 available. At least 10 days of sensor data need to be collected.  
5

## 6 7 **Randomisation**

8  
9 Central randomisation software will be used with stratification by site and baseline glycated  
10 haemoglobin. The randomisation ratio will be 1:1 within each stratum. The randomisation list  
11 created by the study statistician is encrypted.  
12

## 13 14 **Treatment period**

### 15 16 *1. Automated day-and-night hybrid closed-loop insulin delivery combined with low glucose 17 suspend feature (interventional arm)*

18  
19 Participants allocated to the closed-loop group will be trained on using the study insulin pump  
20 (modified Medtronic 640G pump, Medtronic, Northridge, CA, USA) and real-time continuous  
21 glucose sensor (Guardian 3, Medtronic). This represents a complex intervention over usual  
22 care, especially for subjects under pump therapy alone. Once deemed competent with the  
23 use of the devices, participants will receive training required for the closed-loop system.  
24 Competency on the use of closed-loop will be evaluated. During closed-loop period,  
25 participants will program meal boluses estimating ingested carbohydrate amounts. Specific  
26 instructions during closed-loop related to exercise management, sick day rules, hypo- and  
27 hyperglycaemia management and technical troubleshooting will be provided.  
28  
29

### 30 31 *2. Usual care (conventional or sensor-augmented pump therapy) (control arm)*

32  
33 Participants in control arm will receive refresher training on key aspects of insulin pump  
34 therapy (advanced boluses, temporary basal, infusion set change, sensor calibrations).  
35 During 6-month control intervention period, subjects will continue using either their own  
36 insulin pump alone or combined with their pre-study glucose monitoring device.  
37

38  
39 At the study initiation visit, participants in both study groups will be fitted with a blinded  
40 continuous glucose monitoring system (Libre Pro) that will be worn for up to 14 days. If the  
41 sensor fails or gets detached, another sensor may be inserted. The sensor data may be used  
42 to optimise insulin delivery.  
43

## 44 45 **Assessments at 3 months and 6 months**

46  
47 A blood sample will be collected for measurement of glycated haemoglobin. A urine  
48 pregnancy test in females of child-bearing potential will be performed. As per usual clinical  
49 practice, glucometer downloads and pump data will be reviewed, and adjustments to insulin  
50 pump settings will be made as required. Validated surveys evaluating the impact of the  
51 devices employed on quality of life, psychosocial and cognitive functioning, diabetes  
52 management and treatment satisfaction will be administered. At the 3-month follow-up visit,  
53 participants in both study groups will be fitted with blinded continuous glucose monitoring  
54 systems (Libre Pro). For assessment of glycaemic control during the final 3-month period of  
55 the trial, participants in both study groups will be fitted with a blinded continuous glucose  
56 monitoring system 2 to 4 weeks before the end of study. At the 6-month visit, the same  
57 procedures as at the 3-month visit will be followed. A subset of subjects/guardians will be  
58 invited to join follow-up focus groups.  
59  
60

### Study contacts during 6-month study period

Participants in the two study groups will have an equal number of contact visits. The first planned contact will occur within 24-48 hours after study initiation visit. During the first 2 weeks of the study period, participants will be contacted weekly. Thereafter, participants will be contacted monthly. Subjects/parents and/or the clinical team are free to adjust insulin therapy, but no active treatment optimisation will be undertaken by the research team.

### Devices download

As per usual care, insulin pump and blood glucose meter will be downloaded (Medtronic CareLink) every clinic visit (at least every 3 months).

### Closed-loop system

The FlorenceM closed-loop system (Figure 2) incorporates a computer-based algorithm hosted by an Android smartphone, which interacts wirelessly with the modified investigational-use-only 640G pump through a proprietary translator device included in the smartphone's enclosure. By using the information received from the glucose sensor, every ten minutes the system computes a new temporary basal insulin infusion rate, which is automatically sent to the insulin pump. The treat-to-target control algorithm aims to achieve a default glucose level of 5.8mmol/l (104mg/dl) and regulates the actual level depending on fasting versus postprandial status and the accuracy of model-based glucose predictions. No remote monitoring is planned. While the system is charging and connected to internet, the device uploads data on a server. The study pump comprises continuous glucose monitoring receiver and provides hypoglycaemia and hyperglycaemia alarms, which can be activated and personalised by the participants.

### Safety precautions during closed-loop

Participants will be asked to perform capillary calibrations before breakfast and dinner. If sensor glucose value is  $>3.0\text{mmol/l}$  (54mg/dl) different from capillary glucose level, the sensor will be recalibrated. These directions are based on an in-silico simulation of hypo- and hyperglycaemia risk using the validated Cambridge simulator (29). If sensor glucose becomes unavailable or the smartphone is not in range/operational, the pump will automatically deliver the pre-programmed insulin within 30 minutes. Safety rules limit maximum insulin infusion and suspend insulin delivery when sensor glucose is  $\leq 4.3\text{mmol/l}$  (77mg/dl) or when glucose is rapidly decreasing. In case of a communication failure between control algorithm device and the study pump, the low-glucose feature will interrupt insulin delivery, provided sensor glucose is available. Insulin delivery will be resumed in accordance of the low glucose suspend feature implemented on the study pump. A 24-hour local telephone helpline will be available for any technical device issues or problems related to diabetes management.

### Participant withdrawal criteria

The following pre-randomisation withdrawal criteria will apply:

1. Subject/caregiver is unable to demonstrate safe use of study insulin pump as judged by the investigator

2. Subject/caregiver fails to demonstrate compliance with insulin pump and capillary self-monitoring of blood glucose during run-in

Pre- and post-randomisation withdrawal criteria will comprise:

3. Subjects/caregivers may terminate participation in the study at any time without necessarily giving a reason and without any personal disadvantage
4. Significant protocol violation or non-compliance
5. Two distinct episodes of severe hypoglycaemia
6. Two distinct episodes of diabetic ketoacidosis unrelated to infusion site failure and related to the use of the closed-loop
7. Decision by the investigator or the sponsor that termination is in the subject's best medical interest
8. Allergic reaction to insulin
9. Allergic reaction to adhesive surface of infusion set or glucose sensor
10. Subject becomes pregnant during the study period

Subjects withdrawn due to reasons 4-10 will be invited to provide blood sample at the end of the planned study intervention for the assessment of glycated haemoglobin.

### **Psychosocial evaluations**

Cognitive, emotional, and behavioural characteristics of participating subjects and family members and their response to the closed-loop system and clinical trial will be assessed using validated surveys and focus groups. Surveys will be completed at baseline (prior to randomisation), at 3, and 6 months.

To assess how strongly participants value the benefits of the closed-loop (compared with the usual care), we will conduct a discrete choice experiment (DCE). In the DCE, respondents will answer a series of binary choice questions (e.g., "Given a choice between option A or B, which would you prefer...") where those two options offer differing strengths and weaknesses. By varying the performance levels of these different desirable characteristics, we can assess their relative importance.

Focus groups will be completed at the end of the study (6 months). We will conduct virtual focus groups using HIPAA-approved software supported by Stanford University. Focus groups will be run with 3-6 participants and we will work from a script of open-ended questions used to gather feedback and reactions to the closed-loop system/insulin pump therapy, the clinical trial and quality of life changes. The participation of a moderator with advanced training will ensure consistency across groups. Sessions will be audio- and video-taped and transcribed by a professional transcription service.

### **Blood samples**

Screening blood samples will be measured locally. Additional blood samples will be taken for the measurement of non-hypoglycaemia C-peptide and glycated haemoglobin at a central laboratory. Glycated haemoglobin will be assessed at baseline, 3, and 6 months. At each time point, glycated haemoglobin will be measured locally (clinical care) and centrally (analysis of study endpoints). The central analysis will be performed using an International Federation of Clinical Chemistry and Laboratory Medicine aligned method.

## Patient and Public Involvement

The research question and study endpoints are based on feedback from participants of previous studies and in line with prioritising by stakeholders (30). The study design and the assessment of the burden of the intervention were reviewed by focus groups. Results will be disseminated to participants and general public through social media and will be made available on the sponsor's website.

## Statistical analysis

### *Primary Outcome Analysis*

The primary analysis will follow the intention-to-treat principle. Data from all randomised subjects will be analysed in the group to which the subjects were assigned through randomisation regardless of the actual treatment received. Data will not be truncated due to protocol deviations.

The primary analysis will evaluate between group differences in glycated haemoglobin levels at the end of treatment period. A 5% significance level will be considered statistically significant for the primary outcome comparison.

Means  $\pm$  standard deviation (SD) values or percentiles appropriate to the distribution will be reported for the primary outcome by treatment group. The two treatment groups will be compared using a linear regression model adjusting for glycated haemoglobin at baseline, age, and clinical centre as random effect. A 95% confidence interval will be reported for the difference between the randomisation groups based on the linear regression model. Residual values will be examined for an approximate normal distribution. If values are highly skewed, then a transformation or robust statistical methods (e.g., non-parametric or MM estimation) will be used instead. A detailed analysis plan will be provided separately.

### *Other Key Endpoints*

For the following key endpoints at 6 months, the familywise type I error rate will be controlled at two-sided  $\alpha = 0.05$ . A gatekeeping strategy will be used, where the primary endpoint will be tested first, if passing the significance testing, other key endpoints will be tested in the order listed below using the fixed-sequence method at  $\alpha = 0.05$ .

- Time spent in the target glucose range from 3.9 to 10.0mmol/l (70 to 180mg/dl)
- Mean sensor glucose
- Time spent above target glucose 10.0mmol/l (180mg/dl)
- Time spent below target glucose 3.9mmol/l (70mg/dl)

If a non-significant ( $p > 0.05$ ) result is obtained for any outcome on this list, no further hypothesis testing will be performed for any metrics further down on the list.

### *Secondary Efficacy Analyses*

For these exploratory analyses, the false discovery rate will be used to account for multiple comparisons:

#### Continuous glucose monitoring derived indices

- Standard deviation of sensor glucose
- Sensor glucose variability measured with the coefficient of variation
- The time with glucose  $< 3.5$ mmol/l (63mg/dl)

- The time with glucose <3.0mmol/l (54mg/dl)
- Area under the curve of glucose below 3.5mmol/l (63mg/dl)
- The time spent in significant hyperglycaemia (glucose >16.7mmol/l, 300mg/dl)
- Area under the curve of glucose above 10.0mmol/l (180mg/dl)

The following sensor glucose metrics will also be calculated separately for day-time period (06:00-23:59) and night-time period (00:00-05:59):

- The time with glucose from 3.9 to 10.0mmol/l (70-180mg/dl)
- Mean glucose
- Glucose variability as measured by standard deviation
- The time with glucose <3.5mmol/l (63mg/dl)

#### Binary metrics for glycated haemoglobin

- HbA1c <53mmol/mol (7.0%)
- HbA1c <58mmol/mol (7.5%)
- Relative reduction  $\geq 10\%$  from baseline
- Absolute reduction  $\geq 0.5\%$  from baseline
- Absolute reduction  $\geq 1\%$  from baseline
- Absolute reduction  $\geq 1\%$  from baseline or HbA1c <53mmol/mol (7.0%)

#### Insulin and other endpoints

- Total, basal and bolus insulin dose
- Body weight (BMI z-score)
- Blood pressure

The above described glycaemic metrics will be based on sensor glucose levels collected during post-randomisation periods of blinded sensors wear.

### **Safety analyses**

The following events will be recorded and compared between treatment groups:

- Number of severe hypoglycaemia events per subject and incidence rate per 100 person-years
- Number of diabetic ketoacidosis events per subject and incidence rate per 100 person-years
- Sensor glucose-measured hypoglycaemic events per week (>15 minutes with glucose <3mmol/l, 54mg/dl)
- Sensor glucose-measured hyperglycaemic events per week (>15 minutes with glucose >16.7mmol/l, 300mg/dl)
- Proportion of subjects with worsening of glycated haemoglobin from baseline to 6 months by >0.5%

If we record enough observed events to allow formal statistical modelling for above safety outcomes, we will perform the following analyses. Poisson regression models will be constructed to compare the treatment group difference for event rates by adjusting for age, baseline glycated haemoglobin and random site effect. If any outlier exists, a robust Poisson regression model will be used instead. For binary glycated haemoglobin outcome, logistic

1  
2  
3 regression models will be used to compare the treatment group difference by adjusting for  
4 age, baseline glycated haemoglobin and random site effect.  
5

### 6 7 **Utility assessments**

8 The following system use/function outcomes in the intervention arm will be tabulated:  
9

- 10 • Number of low glucose suspend events
  - 11 • Percentage of time when closed-loop system use is functioning
  - 12 • Percentage of time when continuous glucose monitoring is used
- 13  
14  
15

### 16 **Subgroup analyses**

17  
18 No subgroups were considered during the power calculations. Interpretation of any subgroup  
19 analyses will depend on whether the overall analysis demonstrates a significant treatment  
20 group difference. In the absence of such difference, if performed, the subgroup analyses will  
21 be interpreted with caution.  
22

### 23 **Psychosocial analyses**

24  
25 Quantitative data on usability and satisfaction will be analysed using simple descriptive  
26 statistics. Additionally, we will analyse scores from the cognitive, emotional, and behavioural  
27 assessments to determine if changes occur over time and between groups.  
28  
29

30 We will construct predictive models in the general linear framework to examine the  
31 associations with primary outcomes. For the discrete choice experiment (DCE), the strength  
32 of preference (importance) of each performance attribute will be estimated from the pooled  
33 DCE responses using standard regression analysis techniques.  
34  
35

36 Qualitative data will be analysed using Atlas.ti (release 6.0; Scientific Software Development  
37 GmbH, Berlin, Germany) to organize and manage the entire corpus of focus group data.  
38

### 39 **Cost utility analyses**

40  
41 To inform reimbursement and other policy decision-making, we will conduct a cost utility  
42 analysis on the benefits of closed-loop. The analysis timeframe for both costs and benefits  
43 will include not just the study period, but also anticipated future impacts. Costs will be  
44 denominated in US Dollars. They will be framed to include both health-related expenditures  
45 and any realised or projected incremental health cost savings. Utility will be quantified in  
46 quality adjusted life years (QALYS). We will elicit health related quality of life (HRQOL)  
47 during the study period using two preference based measures of health status: the Child  
48 Health Utility 9D (31) and the EuroQol 5D-Y (32). Future health and cost impacts, beyond the  
49 study period, will be estimated using numerical modelling. Incremental cost effectiveness  
50 ratios, comparing the closed-loop system to usual care will be calculated.  
51  
52  
53

### 54 **Interim analysis**

55 We will not perform an interim analysis.  
56  
57  
58  
59  
60



## **Per-protocol analysis**

We will conduct a per-protocol analysis in order to replicate the primary analysis, but limited to participants who did not withdraw from the study (withdrawals excluded even if they return for a 6-month glycated haemoglobin measurement) and used closed-loop for at least 70% of the time (intervention group).

## **Power calculation**

Data from the JDRF Continuous Glucose Monitoring Randomised Clinical Trial (33) from subjects who would have met the eligibility criteria for the current trial were used to project the distribution of baseline and 6-month glycated haemoglobin. Among N=53 subjects meeting the eligibility criteria in the JDRF CGM RCT (n=20 subjects 8 to 12 years of age and n=33 subjects 13 to 18 years of age), the upper limit of the confidence interval for the effective SD of glycated haemoglobin was 0.71%. With this effective SD, for a true 0.4% reduction in glycated haemoglobin, power = 85%, 2-sided type 1 error = 5%, 1:1 randomisation, total sample size is estimated to be 116. Adding 10% for potential dropout/non-compliance results in a final total sample size of approximately 128 (64 in each treatment group).

## **STUDY MANAGEMENT**

### **Data Safety Monitoring Board**

A Data Safety Monitoring Board (DSMB) will be instituted. The DSMB will be notified of all serious adverse events and any unanticipated adverse device effects/events and will perform regular safety data review. The DSMB will report to the National Institute of Diabetes and Digestive and Kidney Diseases (the Funder) any safety concerns and recommendations for suspension or early termination of the trial.

### **Study sponsors**

In the UK the study sponsors are the University of Cambridge and the Cambridge University Hospitals NHS Foundation Trust. Study sponsor in the USA is the Jaeb Center for Health Research.

### **Study management committee**

A study management committee composed of the Chief Investigator, Study Coordinators, and Study Data Manager will meet monthly to discuss the operational aspects of the trial.

### **Data management and monitoring**

Designated personnel from Coordinating Centres will be responsible for maintaining quality assurance and quality control systems to ensure that the trial is conducted and data are generated, documented and reported in compliance with the protocol, Good Clinical Practice, and regulatory requirements.

We will observe confidentiality of subject data. Personal details for each participant with a link to a unique identification number will be held locally on a study screening log in the Trial Master File at each of the investigation centres. These details will not be disclosed at any other stage during the study, and all individual results will remain anonymous.

## Indemnity

Indemnity for any harm arising on the conduct of research will be provided according to arrangements in respective countries:

1) UK - any liability arising from study design will be covered by clinical trial insurance policy organised by the University of Cambridge. National Health Service indemnity cover will apply for any claims arising from management and conduct of research.

2) USA - any liability arising from study design will be under the responsibility of the participants or their insurance company.

## ETHICS AND DISSEMINATION

Approval from independent Research Ethics Committee/Institutional Review Board has been obtained in the UK and the USA. The study has undergone a review by regulatory authorities in the UK (Medicines and Healthcare products Regulatory Agency) and in the USA (Food and Drug Administration). All participants will be provided with oral and written information about the trial and procedures involved in the study before obtaining written informed consent. For minors, parents/guardians will provide written informed consent, and written assent will be gained.

Standard operating procedures for monitoring and reporting of all adverse events and adverse device effects will be in place including serious adverse events, serious adverse device effects and specific adverse events, such as severe hypoglycaemia and significant hyperglycaemia with ketosis.

Any substantial amendments to the protocol and other documents shall be submitted to, and approved by, the independent Research Ethics Committee and Institutional Review Board (UK, East of England-Cambridge South Research Ethics Committee, #16/EE/0380; USA, Jaeb Center for Health Research Institutional Review Board certified by the Office for Human Research Protections, FWA #00000024) and the regulatory authorities, prior to implementation as per nationally agreed guidelines.

The study started enrolling participants in June 2017 and is expected to complete clinical follow up by November 2019 and to report results in 2020. Trial results will be disseminated in internationally peer-reviewed scientific journals.

### **Acknowledgements**

Jasdip Mangat supported development and validation of closed-loop system. Josephine Hayes, Matthew Haydock and Nicole Ashcroft (Institute of Metabolic Science, University of Cambridge) provided administrative support. NIHR Cambridge Clinical Research Facility will support the research team in their research-related activities. Artificial Pancreas focus group contributors provided feedback on the study design. West Midlands Young Persons Advisory Group reviewed Participant Information Sheets.

### **Contributors**

RH, MEW, FC, LD, NT, RPW, LADM, BAB, SAW, CLA, and KKH co-designed the study. CK and PC designed the statistical plan. GM, JMA, SH, MT, CB, FC, LD, NT, RPW, LADM, BAB, SAW, and CLA screened and enrolled participants, arranged informed consent from the participants, provided patient care, and took samples. KKH devised the human factors assessments. JS, SB coordinated the study. JS managed randomisation. DSF will conduct the cost utility analysis. RH designed and implemented the glucose controller. GM and RH wrote the manuscript. All authors critically reviewed the report. No writing assistance was provided.

### **Funding**

National Institute of Diabetes and Digestive and Kidney Diseases of the National Institutes of Health under Award Number UC4DK108520. Additional support for the artificial pancreas work is from National Institute for Health Research Cambridge Biomedical Research Centre, and Wellcome Strategic Award (100574/Z/12/Z). Medtronic is supplying discounted CGM devices, sensors, and details of communication protocol to facilitate real-time connectivity. Abbott Diabetes Care is providing Libre Pro sensors.

### **Relevant disclosures**

RH reports having received speaker honoraria from Eli Lilly and Novo Nordisk, serving on advisory panel for Eli Lilly and Novo Nordisk, receiving licence fees from BBraun and Medtronic. RH and MEW report patent patents and patent applications.

MT has received speaker honoraria from Medtronic and NovoNordisk.

RPW reports receiving speaker honoraria from Dexcom and serving on advisory panels for Eli Lilly and Novo Nordisk and research support from Bigfoot Biomedical, Dexcom, Lexicon, Mannkind and Novo Nordisk. BAB is on Advisory Boards for Novo-Nordisk and Convatec, has received research support from Medtronic Diabetes, Tandem Diabetes, Insulet, Convatec, and Dexcom. SAW has received speaker honoraria from Medtronic, Insulet, and Tandem, and has received consultant honoraria from Sanofi and Zealand Pharmaceuticals.

KKH has received research support from Dexcom, Inc for an investigator-initiated project; he has received consultant fees from Lilly Innovation Center, Bigfoot Biomedical, and Insulet, Inc. LADM reports grants from Medtronic.

GM, JMA, SH, CB, FC, LD, NT, CLA, DSF, CK, JS, SB, PC declare no competing financial interests exist.

### **Ethics and IRB approvals**

East of England - Cambridge South Research Ethics Committee (UK), Jaeb Center for Health Research Institutional Review (IRB) Office (813-975-8690 or irb@jaeb.org) (USA).

### **Provenance and peer review**

Not commissioned, internally peer reviewed.

**Table 1.** Inclusion and exclusion criteria

| <b>Summary of inclusion criteria</b>                                                                                                                                                                                                                                                                                                                                                                                                                                                                                                                                                                                                                                                                                                                                                                                                                                                                                                                                                                                                                                                                                                                                                                                                                                                                                                                                                                                                                                                                                                                                                                                                                                                                                                                                                                                                                                                                                                                                                                                                                                                                                                                                                                                                                                                                                                                                                                                                                                                                                                                                                                                                                                                                                                                                                                                                |
|-------------------------------------------------------------------------------------------------------------------------------------------------------------------------------------------------------------------------------------------------------------------------------------------------------------------------------------------------------------------------------------------------------------------------------------------------------------------------------------------------------------------------------------------------------------------------------------------------------------------------------------------------------------------------------------------------------------------------------------------------------------------------------------------------------------------------------------------------------------------------------------------------------------------------------------------------------------------------------------------------------------------------------------------------------------------------------------------------------------------------------------------------------------------------------------------------------------------------------------------------------------------------------------------------------------------------------------------------------------------------------------------------------------------------------------------------------------------------------------------------------------------------------------------------------------------------------------------------------------------------------------------------------------------------------------------------------------------------------------------------------------------------------------------------------------------------------------------------------------------------------------------------------------------------------------------------------------------------------------------------------------------------------------------------------------------------------------------------------------------------------------------------------------------------------------------------------------------------------------------------------------------------------------------------------------------------------------------------------------------------------------------------------------------------------------------------------------------------------------------------------------------------------------------------------------------------------------------------------------------------------------------------------------------------------------------------------------------------------------------------------------------------------------------------------------------------------------|
| <ul style="list-style-type: none"> <li>▪ Age ≥6 and &lt;19 years</li> <li>▪ Type 1 diabetes as defined by World Health Organization (34) for at least 1 year</li> <li>▪ Use of an insulin pump for at least 3 months, with good knowledge of insulin self-adjustment by subject or caregiver as judged by the investigator</li> <li>▪ Using U-100 rapid acting insulin analogues Aspart or Lispro only</li> <li>▪ Willing to perform regular finger-prick blood glucose monitoring, with at least 4 blood glucose measurements per day</li> <li>▪ Screening glycated haemoglobin ≥58 mmol/mol (7.5%) and ≤86mmol/mol (10%) based on analysis from local laboratory</li> <li>▪ Literate in English</li> <li>▪ Willing to wear continuous glucose sensor and closed-loop system at home</li> <li>▪ Willing to follow study specific instructions</li> <li>▪ Willing to upload pump and glucose sensor data at regular intervals</li> <li>▪ Access to Wi-Fi</li> <li>▪ Living with someone who is trained to administer glucagon and is able to seek emergency assistance</li> </ul>                                                                                                                                                                                                                                                                                                                                                                                                                                                                                                                                                                                                                                                                                                                                                                                                                                                                                                                                                                                                                                                                                                                                                                                                                                                                                                                                                                                                                                                                                                                                                                                                                                                                                                                                                   |
| <b>Summary of exclusion criteria</b>                                                                                                                                                                                                                                                                                                                                                                                                                                                                                                                                                                                                                                                                                                                                                                                                                                                                                                                                                                                                                                                                                                                                                                                                                                                                                                                                                                                                                                                                                                                                                                                                                                                                                                                                                                                                                                                                                                                                                                                                                                                                                                                                                                                                                                                                                                                                                                                                                                                                                                                                                                                                                                                                                                                                                                                                |
| <ul style="list-style-type: none"> <li>▪ Living alone</li> <li>▪ Current use of any closed-loop system</li> <li>▪ Any other physical or psychological disease likely to interfere with the normal conduct of the study and interpretation of the study results, as judged by the investigator</li> <li>▪ Untreated coeliac disease, adrenal insufficiency, or untreated thyroid disease</li> <li>▪ Current treatment with drugs known to interfere with glucose metabolism (e.g., systemic corticosteroids, non-selective beta-blockers and monoamine oxidase inhibitors, etc.)</li> <li>▪ Known or suspected allergy to insulin</li> <li>▪ Clinically significant nephropathy (estimated glomerular filtration rate &lt;45ml/min) or on dialysis, neuropathy or active retinopathy (presence of maculopathy or proliferative changes), as judged by the investigator</li> <li>▪ Recurrent incidents of severe hypoglycaemia (&gt;1 episode) during the previous 6 months (adolescents: severe hypoglycaemia is defined as an event requiring assistance of another person to actively administer carbohydrates, glucagon, or take other corrective actions including episodes of hypoglycaemia severe enough to cause unconsciousness, seizures or attendance at hospital; children: severe hypoglycaemia is defined as an event associated with a seizure or loss of consciousness)</li> <li>▪ Recurrent incidents of diabetic ketoacidosis (&gt;1 episode) during the previous 6 months</li> <li>▪ Unwilling to avoid regular use of acetaminophen</li> <li>▪ Lack of reliable telephone facility for contact</li> <li>▪ Total daily insulin dose ≥2 IU/kg/day and &lt;15 IU/day</li> <li>▪ Pregnancy, planned pregnancy, or breast feeding</li> <li>▪ Severe visual or hearing impairment</li> <li>▪ Seizure disorder</li> <li>▪ Medically documented allergy towards the adhesive (glue) of plasters or unable to tolerate tape adhesive in the area of sensor placement</li> <li>▪ Serious skin diseases (e.g., psoriasis vulgaris, bacterial skin diseases) located at places of the body likely to be used for localisation of the glucose sensor</li> <li>▪ Abusing illicit drugs, prescription drugs or alcohol</li> <li>▪ Use of pramlintide (Symlin), or other non-insulin glucose lowering agents including sulphonylureas, biguanides, DPP4-Inhibitors, GLP-1 analogues, SGLT-1/ 2 inhibitors at time of screening</li> <li>▪ Shift work with working hours between 10pm and 8am</li> <li>▪ Sick cell disease, haemoglobinopathy, or has received red blood cell transfusion or erythropoietin within 3 months prior to time of screening</li> <li>▪ Eating disorder such as anorexia or bulimia</li> <li>▪ Employed by Medtronic Diabetes or with immediate family members employed by Medtronic Diabetes</li> </ul> |

**Table 2.** Schedule of study visits / phone contacts when the participant is randomised to day-and-night closed-loop combined with low glucose feature (intervention group)

|                                         | Visit/<br>contact | Description                                                                                                                                            | Start relative to previous /<br>next Visit / Activity                                               | Duration  |
|-----------------------------------------|-------------------|--------------------------------------------------------------------------------------------------------------------------------------------------------|-----------------------------------------------------------------------------------------------------|-----------|
| <b>Run-in</b>                           | <b>Visit 1</b>    | Recruitment visit: consent, HbA1c, screening bloods, urine pregnancy test, baseline surveys, blinded CGM training and insertion                        |                                                                                                     | 1-4 hours |
|                                         | <b>Visit 2</b>    | Review of baseline bloods, pump settings and CGM data; adjustment of treatment                                                                         | 2 weeks after Visit 1 (+1 week); Run-in could be repeated                                           | 1-2 hours |
| <b>Training Period</b>                  | <b>Visit 3</b>    | Randomisation, repeat HbA1c if Visit 3 and Visit 1 are >28 days apart, urine pregnancy test, study pump training and initiation, competency assessment | May coincide with Visit 2, within 8 weeks of Visit 1                                                | 3-4 hours |
|                                         | <b>Visit 3a</b>   | Real-time CGM training and initiation, competency assessment                                                                                           | Within 0 to 7 days of Visit 3 (Visit 3a may coincide with Visit 3; training visits can be repeated) | 2-4 hours |
| <b>CL + LGS Intervention (6 months)</b> | <b>Visit 4*</b>   | CL initiation at clinic/home: data download, CL and low glucose feature training, competency assessment, blinded CGM                                   | 4 weeks after Randomisation ( $\pm 1$ week)                                                         | 2-6 hours |
|                                         | Contact 1         | Review use of study devices; study update                                                                                                              | Within 24 to 48 hours after Visit 4                                                                 | <1 hour   |
|                                         | <b>Visit 5**</b>  | Review use of study devices; study update                                                                                                              | 1 week after Visit 4 ( $\pm 3$ days)                                                                | <1 hour   |
|                                         | Contact 2         | Review use of study devices; study update                                                                                                              | 2 weeks after Visit 4 ( $\pm 3$ days)                                                               | <1 hour   |
|                                         | Contact 3         | Review use of study devices; study update                                                                                                              | 1 month after Visit 4 ( $\pm 2$ weeks)                                                              | <1 hour   |
|                                         | Contact 4         | Review use of study devices; study update                                                                                                              | 2 months after Visit 4 ( $\pm 2$ weeks)                                                             | <1 hour   |
|                                         | <b>Visit 6</b>    | 3-month visit: HbA1c, urine pregnancy test, data download, blinded CGM, surveys                                                                        | 4 months after Randomisation ( $\pm 2$ weeks)                                                       | 1-3 hours |
|                                         | Contact 5         | Review use of study devices; study update                                                                                                              | 5 months after Randomisation ( $\pm 2$ weeks)                                                       | <1 hour   |
|                                         | Contact 6         | Review use of study devices; study update                                                                                                              | 6 months after Randomisation ( $\pm 2$ weeks)                                                       | <1 hour   |
|                                         | <b>Visit 7</b>    | Blinded CGM                                                                                                                                            | 2-4 weeks before planned Visit 8                                                                    | <0.5 hour |
|                                         | <b>Visit 8</b>    | End of closed-loop treatment arm (6 months of CL): HbA1c, data download, surveys and focus groups; resume usual pump therapy                           | 7 months after Randomisation ( $\pm 2$ weeks)                                                       | 1-3 hours |

\* In-person clinic visit mandatory in USA only.

\*\* Could be done via phone/e-mail in UK. In-person visit mandatory in USA only.

HbA1c, glycated haemoglobin; CGM, continuous glucose monitoring; CL, closed-loop.

**Table 3.** Schedule of study visits / phone contacts when the participant is randomised to usual care (conventional or sensor-augmented insulin pump therapy) (control group)

|                                                           | Visit/<br>contact                                                                                                                                                         | Description                                                                                                                                         | Start relative to previous /<br>next Visit / Activity        | Duration  |
|-----------------------------------------------------------|---------------------------------------------------------------------------------------------------------------------------------------------------------------------------|-----------------------------------------------------------------------------------------------------------------------------------------------------|--------------------------------------------------------------|-----------|
| <b>Run-in</b>                                             | <b>Visit 1</b>                                                                                                                                                            | Recruitment visit: consent, HbA1c, screening bloods, urine pregnancy test, baseline surveys, blinded CGM training and insertion                     |                                                              | 1-4 hours |
|                                                           | <b>Visit 2</b>                                                                                                                                                            | Review of baseline bloods, pump settings and CGM data; adjustment of treatment                                                                      | 2 weeks after Visit 1 (+1 week);<br>Run-in could be repeated | 1-2 hours |
| <b>Training period</b>                                    | <b>Visit 3</b>                                                                                                                                                            | Randomisation, repeat HbA1c if Visit 3 and Visit 1 are >28 days apart, urine pregnancy test, insulin pump refresher training, competency assessment | May coincide with Visit 2, within 8 weeks of Visit 1         | 3-4 hours |
| <b>Usual insulin pump therapy Intervention (6 months)</b> | <b>Visit 4*</b>                                                                                                                                                           | Initiation of standard therapy arm at clinic/home, glucometer download, recording of current insulin requirements, blinded CGM                      | 4 weeks after Randomisation ( $\pm 1$ week)                  | 2-6 hours |
|                                                           | Contact 1                                                                                                                                                                 | Study update                                                                                                                                        | Within 24 to 48 hours after Visit 4                          | <1 hour   |
|                                                           | <b>Visit 5**</b>                                                                                                                                                          | Study update                                                                                                                                        | 1 week after Visit 4 ( $\pm 3$ days)                         | <1 hour   |
|                                                           | Contact 2                                                                                                                                                                 | Study update                                                                                                                                        | 2 weeks after Visit 4 ( $\pm 3$ days)                        | <1 hour   |
|                                                           | Contact 3                                                                                                                                                                 | Study update                                                                                                                                        | 1 month after Visit 4 ( $\pm 2$ weeks)                       | <1 hour   |
|                                                           | Contact 4                                                                                                                                                                 | Study update                                                                                                                                        | 2 months after Visit 4 ( $\pm 2$ weeks)                      | <1 hour   |
|                                                           | <b>Visit 6</b>                                                                                                                                                            | 3-month visit: HbA1c, urine pregnancy test, glucometer download, recording of current insulin requirements, surveys, blinded CGM                    | 4 months after Randomisation ( $\pm 2$ weeks)                | 1-3 hours |
|                                                           | Contact 5                                                                                                                                                                 | Study update                                                                                                                                        | 5 months after Randomisation ( $\pm 2$ weeks)                | <1 hour   |
|                                                           | Contact 6                                                                                                                                                                 | Study update                                                                                                                                        | 6 months after Randomisation ( $\pm 2$ weeks)                | <1 hour   |
|                                                           | <b>Visit 7</b>                                                                                                                                                            | Blinded CGM                                                                                                                                         | 2-4 weeks before planned Visit 8                             | <0.5 hour |
| <b>Visit 8</b>                                            | End of standard pump therapy treatment arm (6 months): HbA1c, glucometer download, recording of current insulin requirements, surveys and focus groups, resume usual care | 7 months after Randomisation ( $\pm 2$ weeks)                                                                                                       | 1-3 hours                                                    |           |

\* In-person clinic visit mandatory in USA only.

\*\* Could be done via phone/e-mail.

HbA1c, glycated haemoglobin; CGM, continuous glucose monitoring.

1  
2  
3 **Figure Legends**  
4

5 **Figure 1** Study flow chart. HbA1c, glycated haemoglobin; CGM, continuous glucose  
6 monitoring.  
7

8 **Figure 2** FlorenceM closed-loop system prototype.  
9

10 The system consists of a continuous glucose monitoring transmitter with Guardian 3 sensor  
11 (Medtronic), an insulin pump (modified 640G pump, Medtronic), and an Android smartphone  
12 running the control algorithm (Cambridge).  
13  
14  
15  
16  
17  
18  
19  
20  
21  
22  
23  
24  
25  
26  
27  
28  
29  
30  
31  
32  
33  
34  
35  
36  
37  
38  
39  
40  
41  
42  
43  
44  
45  
46  
47  
48  
49  
50  
51  
52  
53  
54  
55  
56  
57  
58  
59  
60

## References

1. International Diabetes Federation. IDF Diabetes Atlas 2017. 8th Edition 2017 <http://www.diabetesatlas.org> (last accessed 26th July 2018).
2. Wood JR, Miller KM, Maahs DM, Beck RW, DiMeglio LA, Libman IM, et al. Most youth with type 1 diabetes in the T1D Exchange Clinic Registry do not meet American Diabetes Association or International Society for Pediatric and Adolescent Diabetes clinical guidelines. *Diabetes Care*. 2013;36(7):2035-7.
3. Diabetes Research in Children Network Study G, Buckingham B, Beck RW, Tamborlane WV, Xing D, Kollman C, et al. Continuous glucose monitoring in children with type 1 diabetes. *J Pediatr*. 2007;151(4):388-93, 93 e1-2.
4. Bode BW, Schwartz S, Stubbs HA, Block JE. Glycemic characteristics in continuously monitored patients with type 1 and type 2 diabetes: normative values. *Diabetes Care*. 2005;28(10):2361-6.
5. Cryer PE. Diverse causes of hypoglycemia-associated autonomic failure in diabetes. *N Engl J Med*. 2004;350(22):2272-9.
6. Cryer PE. Mechanisms of hypoglycemia-associated autonomic failure and its component syndromes in diabetes. *Diabetes*. 2005;54(12):3592-601.
7. Wild D, von Maltzahn R, Brohan E, Christensen T, Clauson P, Gonder-Frederick L. A critical review of the literature on fear of hypoglycemia in diabetes: Implications for diabetes management and patient education. *Patient Educ Couns*. 2007;68(1):10-5.
8. Kropff J, DeVries JH. Continuous Glucose Monitoring, Future Products, and Update on Worldwide Artificial Pancreas Projects. *Diabetes Tech Ther*. 2016;18 Suppl 2:S253-63.
9. Juvenile Diabetes Research Foundation Continuous Glucose Monitoring Study G, Tamborlane WV, Beck RW, Bode BW, Buckingham B, Chase HP, et al. Continuous glucose monitoring and intensive treatment of type 1 diabetes. *N Engl J Med*. 2008;359(14):1464-76.
10. Kordonouri O, Pankowska E, Rami B, Kapellen T, Coutant R, Hartmann R, et al. Sensor-augmented pump therapy from the diagnosis of childhood type 1 diabetes: results of the Paediatric Onset Study (ONSET) after 12 months of treatment. *Diabetologia*. 2010;53(12):2487-95.
11. Pickup JC, Freeman SC, Sutton AJ. Glycaemic control in type 1 diabetes during real time continuous glucose monitoring compared with self monitoring of blood glucose: meta-analysis of randomised controlled trials using individual patient data. *Bmj*. 2011;343:d3805.
12. Bergenstal RM, Tamborlane WV, Ahmann A, Buse JB, Dailey G, Davis SN, et al. Effectiveness of sensor-augmented insulin-pump therapy in type 1 diabetes. *N Engl J Med*. 2010;363(4):311-20.
13. Bergenstal RM, Klonoff DC, Garg SK, Bode BW, Meredith M, Slover RH, et al. Threshold-based insulin-pump interruption for reduction of hypoglycemia. *N Engl J Med*. 2013;369(3):224-32.
14. Thabit H, Hovorka R. Coming of age: the artificial pancreas for type 1 diabetes. *Diabetologia*. 2016;59(9):1795-805.
15. Hovorka R. Closed-loop insulin delivery: from bench to clinical practice. *Nat Rev Endocrinol*. 2011;7(7):385-95.
16. FDA News Release. FDA approves first automated insulin delivery device for type 1 diabetes. <http://www.fda.gov/NewsEvents/Newsroom/PressAnnouncements/ucm522974.htm> (last accessed 26 July 2018) [
17. Kropff J, Del Favero S, Place J, Toffanin C, Visentin R, Monaro M, et al. 2 month evening and night closed-loop glucose control in patients with type 1 diabetes under free-living conditions: a randomised crossover trial. *Lancet Diabetes Endocrinol*. 2015;3(12):939-47.
18. Hovorka R, Allen JM, Elleri D, Chassin LJ, Harris J, Xing D, et al. Manual closed-loop insulin delivery in children and adolescents with type 1 diabetes: a phase 2 randomised crossover trial. *Lancet*. 2010;375(9716):743-51.
19. Elleri D, Allen JM, Kumareswaran K, Leelarathna L, Nodale M, Caldwell K, et al. Closed-loop basal insulin delivery over 36 hours in adolescents with type 1 diabetes: randomized clinical trial. *Diabetes Care*. 2013;36(4):838-44.



- 1
- 2
- 3 20. Nimri R, Danne T, Kordonouri O, Atlas E, Bratina N, Biester T, et al. The "Glucositter"  
4 overnight automated closed loop system for type 1 diabetes: a randomized crossover trial.  
5 *Pediatr Diabetes*. 2013;14(3):159-67.
- 6 21. Hovorka R, Elleri D, Thabit H, Allen JM, Leelarathna L, El-Khairi R, et al. Overnight  
7 Closed Loop Insulin Delivery in Young People with Type 1 Diabetes: A Free-Living  
8 Randomised Clinical Trial. *Diabetes Care*. 2014;37(5):1204-11.
- 9 22. Thabit H, Tauschmann M, Allen JM, Leelarathna L, Hartnell S, Wilinska ME, et al.  
10 Home Use of an Artificial Beta Cell in Type 1 Diabetes. *N Engl J Med*. 2015;373(22):2129-  
11 40.
- 12 23. Nimri R, Muller I, Atlas E, Miller S, Kordonouri O, Bratina N, et al. Night glucose  
13 control with MD-Logic artificial pancreas in home setting: a single blind, randomized  
14 crossover trial-interim analysis. *Pediatr Diabetes*. 2014;15(2):91-9.
- 15 24. Tauschmann M, Allen JM, Wilinska ME, Thabit H, Stewart Z, Cheng P, et al. Day-  
16 and-Night Hybrid Closed-Loop Insulin Delivery in Adolescents With Type 1 Diabetes: A Free-  
17 Living, Randomized Clinical Trial. *Diabetes Care*. 2016;Jan 6 [Epub ahead of print].
- 18 25. Leelarathna L, Dellweg S, Mader JK, Allen JM, Benesch C, Doll W, et al. Day and  
19 night home closed-loop insulin delivery in adults with type 1 diabetes: three-center  
20 randomized crossover study. *Diabetes Care*. 2014;37(7):1931-7.
- 21 26. Thabit H, Lubina-Solomon A, Stadler M, Leelarathna L, Walkinshaw E, Pernet A, et  
22 al. Home use of closed-loop insulin delivery for overnight glucose control in adults with type 1  
23 diabetes: a 4-week, multicentre, randomised crossover study. *Lancet Diabetes Endocrinol*.  
24 2014;2(9):701-9.
- 25 27. Barnard KD, Wysocki T, Allen JM, Elleri D, Thabit H, Leelarathna L, et al. Closing the  
26 loop overnight at home setting: psychosocial impact for adolescents with type 1 diabetes and  
27 their parents. *BMJ Open Diabetes Res Care*. 2014;2(1):e000025.
- 28 28. Bekiari E, Kitsios K, Thabit H, Tauschmann M, Athanasiadou E, Karagiannis T, et al.  
29 Artificial pancreas treatment for outpatients with type 1 diabetes: systematic review and  
30 meta-analysis. *Bmj*. 2018;361:k1310.
- 31 29. Wilinska ME, Chassin LJ, Acerini CL, Allen JM, Dunger DB, Hovorka R. Simulation  
32 environment to evaluate closed-loop insulin delivery systems in type 1 diabetes. *J Diabetes  
33 Sci Technol*. 2010;4(1):132-44.
- 34 30. Boughton CK, Hovorka R. Is an artificial pancreas (closed-loop system) for Type 1  
35 diabetes effective? *Diabet Med*. 2019;36(3):279-86.
- 36 31. Stevens K. Developing a descriptive system for a new preference-based measure of  
37 health-related quality of life for children. *Qual Life Res*. 2009;18(8):1105-13.
- 38 32. Wille N, Badia X, Bonsel G, Burstrom K, Cavrini G, Devlin N, et al. Development of  
39 the EQ-5D-Y: a child-friendly version of the EQ-5D. *Qual Life Res*. 2010;19(6):875-86.
- 40 33. Effectiveness of continuous glucose monitoring in a clinical care environment:  
41 evidence from the Juvenile Diabetes Research Foundation continuous glucose monitoring  
42 (JDRF-CGM) trial. *Diabetes Care*. 2010;33(1):17-22.
- 43 34. World Health Organization. Definition, Diagnosis and Classification of Diabetes  
44 Mellitus and its Complications. Part 1: Diagnosis and Classification of Diabetes Mellitus.  
45 WHO/NCD/NCS/99.2. Geneva, (1999).
- 46
- 47
- 48
- 49
- 50
- 51
- 52
- 53
- 54
- 55
- 56
- 57
- 58
- 59
- 60

**Figure 1.** Study flow chart



**Figure 2.** FlorenceM closed-loop system prototype

The system consists of a continuous glucose monitoring transmitter with Guardian 3 sensor (Medtronic), an insulin pump (modified 640G pump, Medtronic), and an Android smartphone running the control algorithm (Cambridge).



# Reporting checklist for protocol of a clinical trial.

Based on the SPIRIT guidelines.

## Instructions to authors

Complete this checklist by entering the page numbers from your manuscript where readers will find each of the items listed below.

Your article may not currently address all the items on the checklist. Please modify your text to include the missing information. If you are certain that an item does not apply, please write "n/a" and provide a short explanation.

Upload your completed checklist as an extra file when you submit to a journal.

In your methods section, say that you used the SPIRIT reporting guidelines, and cite them as:

Chan A-W, Tetzlaff JM, Altman DG, Laupacis A, Gøtzsche PC, Krleža-Jerić K, Hróbjartsson A, Mann H, Dickersin K, Berlin J, Doré C, Parulekar W, Summerskill W, Groves T, Schulz K, Sox H, Rockhold FW, Rennie D, Moher D. SPIRIT 2013 Statement: Defining standard protocol items for clinical trials. *Ann Intern Med.* 2013;158(3):200-207

|                    |                     | Reporting Item                                                                                               | Page Number |
|--------------------|---------------------|--------------------------------------------------------------------------------------------------------------|-------------|
| Title              | <a href="#">#1</a>  | Descriptive title identifying the study design, population, interventions, and, if applicable, trial acronym | 1           |
| Trial registration | <a href="#">#2a</a> | Trial identifier and registry name. If not yet registered, name of intended registry                         | 2           |

|    |                     |                     |                                                  |
|----|---------------------|---------------------|--------------------------------------------------|
| 1  |                     |                     | NCT02925299                                      |
| 2  |                     |                     |                                                  |
| 3  |                     |                     | (ClinicalTrials.gov)                             |
| 4  |                     |                     |                                                  |
| 5  |                     |                     |                                                  |
| 6  |                     |                     | DAN05                                            |
| 7  |                     |                     |                                                  |
| 8  |                     |                     |                                                  |
| 9  |                     |                     |                                                  |
| 10 | Trial registration: | <a href="#">#2b</a> | All items from the World Health Organization     |
| 11 |                     |                     |                                                  |
| 12 | data set            |                     | Trial Registration Data Set                      |
| 13 |                     |                     |                                                  |
| 14 |                     |                     |                                                  |
| 15 | Protocol version    | <a href="#">#3</a>  | Date and version identifier                      |
| 16 |                     |                     | 16.04.2018 (6.0)                                 |
| 17 |                     |                     |                                                  |
| 18 | Funding             | <a href="#">#4</a>  | Sources and types of financial, material, and    |
| 19 |                     |                     | other support                                    |
| 20 |                     |                     | 14                                               |
| 21 |                     |                     |                                                  |
| 22 |                     |                     |                                                  |
| 23 | Roles and           | <a href="#">#5a</a> | Names, affiliations, and roles of protocol       |
| 24 |                     |                     | contributors                                     |
| 25 | responsibilities:   |                     |                                                  |
| 26 |                     |                     |                                                  |
| 27 | contributorship     |                     |                                                  |
| 28 |                     |                     |                                                  |
| 29 |                     |                     |                                                  |
| 30 |                     |                     |                                                  |
| 31 | Roles and           | <a href="#">#5b</a> | Name and contact information for the trial       |
| 32 |                     |                     | sponsor                                          |
| 33 | responsibilities:   |                     |                                                  |
| 34 |                     |                     | NCT02925299                                      |
| 35 | sponsor contact     |                     | (ClinicalTrials.gov)                             |
| 36 |                     |                     |                                                  |
| 37 | information         |                     |                                                  |
| 38 |                     |                     |                                                  |
| 39 |                     |                     |                                                  |
| 40 |                     |                     |                                                  |
| 41 | Roles and           | <a href="#">#5c</a> | Role of study sponsor and funders, if any, in    |
| 42 |                     |                     | study design; collection, management,            |
| 43 | responsibilities:   |                     |                                                  |
| 44 |                     |                     | NCT02925299                                      |
| 45 | sponsor and funder  |                     | (ClinicalTrials.gov)                             |
| 46 |                     |                     |                                                  |
| 47 |                     |                     | analysis, and interpretation of data; writing of |
| 48 |                     |                     | the report; and the decision to submit the       |
| 49 |                     |                     | report for publication, including whether they   |
| 50 |                     |                     | will have ultimate authority over any of these   |
| 51 |                     |                     | activities                                       |
| 52 |                     |                     |                                                  |
| 53 |                     |                     |                                                  |
| 54 |                     |                     |                                                  |
| 55 |                     |                     |                                                  |
| 56 |                     |                     |                                                  |
| 57 |                     |                     |                                                  |
| 58 |                     |                     |                                                  |
| 59 |                     |                     |                                                  |
| 60 |                     |                     |                                                  |

|    |                      |                     |                                                     |                   |
|----|----------------------|---------------------|-----------------------------------------------------|-------------------|
| 1  | Roles and            | <a href="#">#5d</a> | Composition, roles, and responsibilities of the     | See supplementary |
| 2  |                      |                     |                                                     |                   |
| 3  | responsibilities:    |                     | coordinating centre, steering committee,            | file              |
| 4  |                      |                     |                                                     |                   |
| 5  | committees           |                     | endpoint adjudication committee, data               |                   |
| 6  |                      |                     |                                                     |                   |
| 7  |                      |                     | management team, and other individuals or           |                   |
| 8  |                      |                     |                                                     |                   |
| 9  |                      |                     | groups overseeing the trial, if applicable (see     |                   |
| 10 |                      |                     |                                                     |                   |
| 11 |                      |                     | Item 21a for data monitoring committee)             |                   |
| 12 |                      |                     |                                                     |                   |
| 13 |                      |                     |                                                     |                   |
| 14 |                      |                     |                                                     |                   |
| 15 | Background and       | <a href="#">#6a</a> | Description of research question and                | 4                 |
| 16 |                      |                     |                                                     |                   |
| 17 | rationale            |                     | justification for undertaking the trial, including  |                   |
| 18 |                      |                     |                                                     |                   |
| 19 |                      |                     | summary of relevant studies (published and          |                   |
| 20 |                      |                     |                                                     |                   |
| 21 |                      |                     | unpublished) examining benefits and harms for       |                   |
| 22 |                      |                     |                                                     |                   |
| 23 |                      |                     | each intervention                                   |                   |
| 24 |                      |                     |                                                     |                   |
| 25 |                      |                     |                                                     |                   |
| 26 |                      |                     |                                                     |                   |
| 27 |                      |                     |                                                     |                   |
| 28 | Background and       | <a href="#">#6b</a> | Explanation for choice of comparators               | 4                 |
| 29 |                      |                     |                                                     |                   |
| 30 | rationale: choice of |                     |                                                     |                   |
| 31 |                      |                     |                                                     |                   |
| 32 | comparators          |                     |                                                     |                   |
| 33 |                      |                     |                                                     |                   |
| 34 |                      |                     |                                                     |                   |
| 35 | Objectives           | <a href="#">#7</a>  | Specific objectives or hypotheses                   | 2, 5              |
| 36 |                      |                     |                                                     |                   |
| 37 |                      |                     |                                                     |                   |
| 38 | Trial design         | <a href="#">#8</a>  | Description of trial design including type of trial | 5                 |
| 39 |                      |                     |                                                     |                   |
| 40 |                      |                     | (eg, parallel group, crossover, factorial, single   |                   |
| 41 |                      |                     |                                                     |                   |
| 42 |                      |                     | group), allocation ratio, and framework (eg,        |                   |
| 43 |                      |                     |                                                     |                   |
| 44 |                      |                     | superiority, equivalence, non-inferiority,          |                   |
| 45 |                      |                     |                                                     |                   |
| 46 |                      |                     | exploratory)                                        |                   |
| 47 |                      |                     |                                                     |                   |
| 48 |                      |                     |                                                     |                   |
| 49 |                      |                     |                                                     |                   |
| 50 |                      |                     |                                                     |                   |
| 51 | Study setting        | <a href="#">#9</a>  | Description of study settings (eg, community        | 5                 |
| 52 |                      |                     |                                                     |                   |
| 53 |                      |                     | clinic, academic hospital) and list of countries    |                   |
| 54 |                      |                     |                                                     |                   |
| 55 |                      |                     | where data will be collected. Reference to          |                   |
| 56 |                      |                     |                                                     |                   |
| 57 |                      |                     | where list of study sites can be obtained           |                   |
| 58 |                      |                     |                                                     |                   |
| 59 |                      |                     |                                                     |                   |
| 60 |                      |                     |                                                     |                   |

|    |                      |                      |                                                       |              |
|----|----------------------|----------------------|-------------------------------------------------------|--------------|
| 1  | Eligibility criteria | <a href="#">#10</a>  | Inclusion and exclusion criteria for participants.    | 15           |
| 2  |                      |                      |                                                       |              |
| 3  |                      |                      | If applicable, eligibility criteria for study centres |              |
| 4  |                      |                      | and individuals who will perform the                  |              |
| 5  |                      |                      | interventions (eg, surgeons, psychotherapists)        |              |
| 6  |                      |                      |                                                       |              |
| 7  |                      |                      |                                                       |              |
| 8  |                      |                      |                                                       |              |
| 9  |                      |                      |                                                       |              |
| 10 |                      |                      |                                                       |              |
| 11 | Interventions:       | <a href="#">#11a</a> | Interventions for each group with sufficient          | 5, 16, 17    |
| 12 |                      |                      |                                                       |              |
| 13 | description          |                      | detail to allow replication, including how and        |              |
| 14 |                      |                      | when they will be administered                        |              |
| 15 |                      |                      |                                                       |              |
| 16 |                      |                      |                                                       |              |
| 17 |                      |                      |                                                       |              |
| 18 |                      |                      |                                                       |              |
| 19 | Interventions:       | <a href="#">#11b</a> | Criteria for discontinuing or modifying allocated     | See protocol |
| 20 |                      |                      | interventions for a given trial participant (eg,      |              |
| 21 | modifications        |                      | drug dose change in response to harms,                |              |
| 22 |                      |                      | participant request, or improving / worsening         |              |
| 23 |                      |                      | disease)                                              |              |
| 24 |                      |                      |                                                       |              |
| 25 |                      |                      |                                                       |              |
| 26 |                      |                      |                                                       |              |
| 27 |                      |                      |                                                       |              |
| 28 |                      |                      |                                                       |              |
| 29 |                      |                      |                                                       |              |
| 30 |                      |                      |                                                       |              |
| 31 | Interventions:       | <a href="#">#11c</a> | Strategies to improve adherence to                    | N/A          |
| 32 |                      |                      |                                                       |              |
| 33 | adherence            |                      | intervention protocols, and any procedures for        |              |
| 34 |                      |                      | monitoring adherence (eg, drug tablet return;         |              |
| 35 |                      |                      | laboratory tests)                                     |              |
| 36 |                      |                      |                                                       |              |
| 37 |                      |                      |                                                       |              |
| 38 |                      |                      |                                                       |              |
| 39 |                      |                      |                                                       |              |
| 40 |                      |                      |                                                       |              |
| 41 | Interventions:       | <a href="#">#11d</a> | Relevant concomitant care and interventions           | 7            |
| 42 |                      |                      |                                                       |              |
| 43 | concomitant care     |                      | that are permitted or prohibited during the trial     |              |
| 44 |                      |                      |                                                       |              |
| 45 |                      |                      |                                                       |              |
| 46 | Outcomes             | <a href="#">#12</a>  | Primary, secondary, and other outcomes,               | 9, 10        |
| 47 |                      |                      |                                                       |              |
| 48 |                      |                      | including the specific measurement variable           |              |
| 49 |                      |                      | (eg, systolic blood pressure), analysis metric        |              |
| 50 |                      |                      | (eg, change from baseline, final value, time to       |              |
| 51 |                      |                      | event), method of aggregation (eg, median,            |              |
| 52 |                      |                      | proportion), and time point for each outcome.         |              |
| 53 |                      |                      |                                                       |              |
| 54 |                      |                      |                                                       |              |
| 55 |                      |                      |                                                       |              |
| 56 |                      |                      |                                                       |              |
| 57 |                      |                      |                                                       |              |
| 58 |                      |                      |                                                       |              |
| 59 |                      |                      |                                                       |              |
| 60 |                      |                      |                                                       |              |

1 Explanation of the clinical relevance of chosen  
 2 efficacy and harm outcomes is strongly  
 3 recommended  
 4  
 5  
 6  
 7

|    |                      |                      |                                                   |              |
|----|----------------------|----------------------|---------------------------------------------------|--------------|
| 8  | Participant timeline | <a href="#">#13</a>  | Time schedule of enrolment, interventions         | See Figure 1 |
| 9  |                      |                      | (including any run-ins and washouts),             |              |
| 10 |                      |                      | assessments, and visits for participants. A       |              |
| 11 |                      |                      | schematic diagram is highly recommended           |              |
| 12 |                      |                      | (see Figure)                                      |              |
| 13 |                      |                      |                                                   |              |
| 14 |                      |                      |                                                   |              |
| 15 |                      |                      |                                                   |              |
| 16 |                      |                      |                                                   |              |
| 17 |                      |                      |                                                   |              |
| 18 |                      |                      |                                                   |              |
| 19 |                      |                      |                                                   |              |
| 20 | Sample size          | <a href="#">#14</a>  | Estimated number of participants needed to        | 12           |
| 21 |                      |                      | achieve study objectives and how it was           |              |
| 22 |                      |                      | determined, including clinical and statistical    |              |
| 23 |                      |                      | assumptions supporting any sample size            |              |
| 24 |                      |                      | calculations                                      |              |
| 25 |                      |                      |                                                   |              |
| 26 |                      |                      |                                                   |              |
| 27 |                      |                      |                                                   |              |
| 28 |                      |                      |                                                   |              |
| 29 |                      |                      |                                                   |              |
| 30 |                      |                      |                                                   |              |
| 31 |                      |                      |                                                   |              |
| 32 | Recruitment          | <a href="#">#15</a>  | Strategies for achieving adequate participant     | 5            |
| 33 |                      |                      | enrolment to reach target sample size             |              |
| 34 |                      |                      |                                                   |              |
| 35 |                      |                      |                                                   |              |
| 36 |                      |                      |                                                   |              |
| 37 |                      |                      |                                                   |              |
| 38 | Allocation:          | <a href="#">#16a</a> | Method of generating the allocation sequence      | 6            |
| 39 | sequence             |                      | (eg, computer-generated random numbers),          |              |
| 40 |                      |                      | and list of any factors for stratification. To    |              |
| 41 | generation           |                      | reduce predictability of a random sequence,       |              |
| 42 |                      |                      | details of any planned restriction (eg, blocking) |              |
| 43 |                      |                      | should be provided in a separate document         |              |
| 44 |                      |                      | that is unavailable to those who enrol            |              |
| 45 |                      |                      | participants or assign interventions              |              |
| 46 |                      |                      |                                                   |              |
| 47 |                      |                      |                                                   |              |
| 48 |                      |                      |                                                   |              |
| 49 |                      |                      |                                                   |              |
| 50 |                      |                      |                                                   |              |
| 51 |                      |                      |                                                   |              |
| 52 |                      |                      |                                                   |              |
| 53 |                      |                      |                                                   |              |
| 54 |                      |                      |                                                   |              |
| 55 |                      |                      |                                                   |              |
| 56 |                      |                      |                                                   |              |
| 57 |                      |                      |                                                   |              |
| 58 |                      |                      |                                                   |              |
| 59 |                      |                      |                                                   |              |
| 60 |                      |                      |                                                   |              |



|    |                     |                      |                                                    |              |
|----|---------------------|----------------------|----------------------------------------------------|--------------|
| 1  | Allocation          | <a href="#">#16b</a> | Mechanism of implementing the allocation           | 6            |
| 2  |                     |                      |                                                    |              |
| 3  | concealment         |                      | sequence (eg, central telephone; sequentially      |              |
| 4  |                     |                      | numbered, opaque, sealed envelopes),               |              |
| 5  | mechanism           |                      | describing any steps to conceal the sequence       |              |
| 6  |                     |                      | until interventions are assigned                   |              |
| 7  |                     |                      |                                                    |              |
| 8  |                     |                      |                                                    |              |
| 9  |                     |                      |                                                    |              |
| 10 |                     |                      |                                                    |              |
| 11 |                     |                      |                                                    |              |
| 12 |                     |                      |                                                    |              |
| 13 | Allocation:         | <a href="#">#16c</a> | Who will generate the allocation sequence,         |              |
| 14 |                     |                      | who will enrol participants, and who will assign   |              |
| 15 | implementation      |                      | participants to interventions                      |              |
| 16 |                     |                      |                                                    |              |
| 17 |                     |                      |                                                    |              |
| 18 |                     |                      |                                                    |              |
| 19 |                     |                      |                                                    |              |
| 20 |                     |                      |                                                    |              |
| 21 | Blinding (masking)  | <a href="#">#17a</a> | Who will be blinded after assignment to            | N/A          |
| 22 |                     |                      | interventions (eg, trial participants, care        |              |
| 23 |                     |                      | providers, outcome assessors, data analysts),      |              |
| 24 |                     |                      | and how                                            |              |
| 25 |                     |                      |                                                    |              |
| 26 |                     |                      |                                                    |              |
| 27 |                     |                      |                                                    |              |
| 28 |                     |                      |                                                    |              |
| 29 |                     |                      |                                                    |              |
| 30 |                     |                      |                                                    |              |
| 31 | Blinding (masking): | <a href="#">#17b</a> | If blinded, circumstances under which              | N/A          |
| 32 |                     |                      | unblinding is permissible, and procedure for       |              |
| 33 | emergency           |                      | revealing a participant's allocated intervention   |              |
| 34 |                     |                      | during the trial                                   |              |
| 35 | unblinding          |                      |                                                    |              |
| 36 |                     |                      |                                                    |              |
| 37 |                     |                      |                                                    |              |
| 38 |                     |                      |                                                    |              |
| 39 |                     |                      |                                                    |              |
| 40 |                     |                      |                                                    |              |
| 41 | Data collection     | <a href="#">#18a</a> | Plans for assessment and collection of             | See protocol |
| 42 |                     |                      | outcome, baseline, and other trial data,           |              |
| 43 | plan                |                      | including any related processes to promote         |              |
| 44 |                     |                      | data quality (eg, duplicate measurements,          |              |
| 45 |                     |                      | training of assessors) and a description of        |              |
| 46 |                     |                      | study instruments (eg, questionnaires,             |              |
| 47 |                     |                      | laboratory tests) along with their reliability and |              |
| 48 |                     |                      | validity, if known. Reference to where data        |              |
| 49 |                     |                      |                                                    |              |
| 50 |                     |                      |                                                    |              |
| 51 |                     |                      |                                                    |              |
| 52 |                     |                      |                                                    |              |
| 53 |                     |                      |                                                    |              |
| 54 |                     |                      |                                                    |              |
| 55 |                     |                      |                                                    |              |
| 56 |                     |                      |                                                    |              |
| 57 |                     |                      |                                                    |              |
| 58 |                     |                      |                                                    |              |
| 59 |                     |                      |                                                    |              |
| 60 |                     |                      |                                                    |              |

|    |                      |                                                                    |              |
|----|----------------------|--------------------------------------------------------------------|--------------|
| 1  |                      | collection forms can be found, if not in the                       |              |
| 2  |                      |                                                                    |              |
| 3  |                      | protocol                                                           |              |
| 4  |                      |                                                                    |              |
| 5  |                      |                                                                    |              |
| 6  | Data collection      | <a href="#">#18b</a> Plans to promote participant retention and    | See protocol |
| 7  |                      |                                                                    |              |
| 8  | plan: retention      | complete follow-up, including list of any                          |              |
| 9  |                      |                                                                    |              |
| 10 |                      | outcome data to be collected for participants                      |              |
| 11 |                      |                                                                    |              |
| 12 |                      | who discontinue or deviate from intervention                       |              |
| 13 |                      |                                                                    |              |
| 14 |                      | protocols                                                          |              |
| 15 |                      |                                                                    |              |
| 16 |                      |                                                                    |              |
| 17 |                      |                                                                    |              |
| 18 | Data management      | <a href="#">#19</a> Plans for data entry, coding, security, and    | 12           |
| 19 |                      |                                                                    |              |
| 20 |                      | storage, including any related processes to                        |              |
| 21 |                      |                                                                    |              |
| 22 |                      | promote data quality (eg, double data entry;                       |              |
| 23 |                      |                                                                    |              |
| 24 |                      | range checks for data values). Reference to                        |              |
| 25 |                      |                                                                    |              |
| 26 |                      | where details of data management procedures                        |              |
| 27 |                      |                                                                    |              |
| 28 |                      | can be found, if not in the protocol                               |              |
| 29 |                      |                                                                    |              |
| 30 |                      |                                                                    |              |
| 31 |                      |                                                                    |              |
| 32 | Statistics:          | <a href="#">#20a</a> Statistical methods for analysing primary and | 9            |
| 33 |                      |                                                                    |              |
| 34 | outcomes             | secondary outcomes. Reference to where                             |              |
| 35 |                      |                                                                    |              |
| 36 |                      | other details of the statistical analysis plan can                 |              |
| 37 |                      |                                                                    |              |
| 38 |                      | be found, if not in the protocol                                   |              |
| 39 |                      |                                                                    |              |
| 40 |                      |                                                                    |              |
| 41 |                      |                                                                    |              |
| 42 | Statistics:          | <a href="#">#20b</a> Methods for any additional analyses (eg,      | 11           |
| 43 |                      |                                                                    |              |
| 44 | additional analyses  | subgroup and adjusted analyses)                                    |              |
| 45 |                      |                                                                    |              |
| 46 |                      |                                                                    |              |
| 47 |                      |                                                                    |              |
| 48 | Statistics: analysis | <a href="#">#20c</a> Definition of analysis population relating to | 11           |
| 49 |                      |                                                                    |              |
| 50 | population and       | protocol non-adherence (eg, as randomised                          |              |
| 51 |                      |                                                                    |              |
| 52 | missing data         | analysis), and any statistical methods to handle                   |              |
| 53 |                      |                                                                    |              |
| 54 |                      | missing data (eg, multiple imputation)                             |              |
| 55 |                      |                                                                    |              |
| 56 |                      |                                                                    |              |
| 57 |                      |                                                                    |              |
| 58 |                      |                                                                    |              |
| 59 |                      |                                                                    |              |
| 60 |                      |                                                                    |              |

|    |                  |                      |                                                     |       |
|----|------------------|----------------------|-----------------------------------------------------|-------|
| 1  | Data monitoring: | <a href="#">#21a</a> | Composition of data monitoring committee            | 12    |
| 2  |                  |                      |                                                     |       |
| 3  | formal committee |                      | (DMC); summary of its role and reporting            |       |
| 4  |                  |                      | structure; statement of whether it is               |       |
| 5  |                  |                      | independent from the sponsor and competing          |       |
| 6  |                  |                      | interests; and reference to where further details   |       |
| 7  |                  |                      | about its charter can be found, if not in the       |       |
| 8  |                  |                      | protocol. Alternatively, an explanation of why a    |       |
| 9  |                  |                      | DMC is not needed                                   |       |
| 10 |                  |                      |                                                     |       |
| 11 | Data monitoring: | <a href="#">#21b</a> | Description of any interim analyses and             | 11    |
| 12 |                  |                      |                                                     |       |
| 13 | interim analysis |                      | stopping guidelines, including who will have        |       |
| 14 |                  |                      | access to these interim results and make the        |       |
| 15 |                  |                      | final decision to terminate the trial               |       |
| 16 |                  |                      |                                                     |       |
| 17 |                  |                      |                                                     |       |
| 18 |                  |                      |                                                     |       |
| 19 |                  |                      |                                                     |       |
| 20 | Harms            | <a href="#">#22</a>  | Plans for collecting, assessing, reporting, and     | 12-13 |
| 21 |                  |                      | managing solicited and spontaneously reported       |       |
| 22 |                  |                      | adverse events and other unintended effects of      |       |
| 23 |                  |                      | trial interventions or trial conduct                |       |
| 24 |                  |                      |                                                     |       |
| 25 |                  |                      |                                                     |       |
| 26 |                  |                      |                                                     |       |
| 27 |                  |                      |                                                     |       |
| 28 |                  |                      |                                                     |       |
| 29 |                  |                      |                                                     |       |
| 30 | Auditing         | <a href="#">#23</a>  | Frequency and procedures for auditing trial         | 12    |
| 31 |                  |                      | conduct, if any, and whether the process will       |       |
| 32 |                  |                      | be independent from investigators and the           |       |
| 33 |                  |                      | sponsor                                             |       |
| 34 |                  |                      |                                                     |       |
| 35 |                  |                      |                                                     |       |
| 36 |                  |                      |                                                     |       |
| 37 |                  |                      |                                                     |       |
| 38 |                  |                      |                                                     |       |
| 39 |                  |                      |                                                     |       |
| 40 | Research ethics  | <a href="#">#24</a>  | Plans for seeking research ethics committee /       | 13    |
| 41 |                  |                      | institutional review board (REC / IRB) approval     |       |
| 42 | approval         |                      |                                                     |       |
| 43 |                  |                      |                                                     |       |
| 44 |                  |                      |                                                     |       |
| 45 |                  |                      |                                                     |       |
| 46 |                  |                      |                                                     |       |
| 47 |                  |                      |                                                     |       |
| 48 |                  |                      |                                                     |       |
| 49 |                  |                      |                                                     |       |
| 50 | Protocol         | <a href="#">#25</a>  | Plans for communicating important protocol          | 13    |
| 51 |                  |                      |                                                     |       |
| 52 | amendments       |                      | modifications (eg, changes to eligibility criteria, |       |
| 53 |                  |                      |                                                     |       |
| 54 |                  |                      |                                                     |       |
| 55 |                  |                      |                                                     |       |
| 56 |                  |                      |                                                     |       |
| 57 |                  |                      |                                                     |       |
| 58 |                  |                      |                                                     |       |
| 59 |                  |                      |                                                     |       |
| 60 |                  |                      |                                                     |       |

|    |                    |                                                                       |     |
|----|--------------------|-----------------------------------------------------------------------|-----|
| 1  |                    | outcomes, analyses) to relevant parties (eg,                          |     |
| 2  |                    | investigators, REC / IRBs, trial participants,                        |     |
| 3  |                    | trial registries, journals, regulators)                               |     |
| 4  |                    |                                                                       |     |
| 5  |                    |                                                                       |     |
| 6  |                    |                                                                       |     |
| 7  |                    |                                                                       |     |
| 8  | Consent or assent  | <a href="#">#26a</a> Who will obtain informed consent or assent       | 5   |
| 9  |                    | from potential trial participants or authorised                       |     |
| 10 |                    | surrogates, and how (see Item 32)                                     |     |
| 11 |                    |                                                                       |     |
| 12 |                    |                                                                       |     |
| 13 |                    |                                                                       |     |
| 14 |                    |                                                                       |     |
| 15 | Consent or assent: | <a href="#">#26b</a> Additional consent provisions for collection and | N/A |
| 16 | ancillary studies  | use of participant data and biological                                |     |
| 17 |                    | specimens in ancillary studies, if applicable                         |     |
| 18 |                    |                                                                       |     |
| 19 |                    |                                                                       |     |
| 20 |                    |                                                                       |     |
| 21 |                    |                                                                       |     |
| 22 |                    |                                                                       |     |
| 23 | Confidentiality    | <a href="#">#27</a> How personal information about potential and      | 12  |
| 24 |                    | enrolled participants will be collected, shared,                      |     |
| 25 |                    | and maintained in order to protect                                    |     |
| 26 |                    | confidentiality before, during, and after the trial                   |     |
| 27 |                    |                                                                       |     |
| 28 |                    |                                                                       |     |
| 29 |                    |                                                                       |     |
| 30 |                    |                                                                       |     |
| 31 |                    |                                                                       |     |
| 32 |                    |                                                                       |     |
| 33 | Declaration of     | <a href="#">#28</a> Financial and other competing interests for       | 14  |
| 34 | interests          | principal investigators for the overall trial and                     |     |
| 35 |                    | each study site                                                       |     |
| 36 |                    |                                                                       |     |
| 37 |                    |                                                                       |     |
| 38 |                    |                                                                       |     |
| 39 |                    |                                                                       |     |
| 40 |                    |                                                                       |     |
| 41 | Data access        | <a href="#">#29</a> Statement of who will have access to the final    | 12  |
| 42 |                    | trial dataset, and disclosure of contractual                          |     |
| 43 |                    | agreements that limit such access for                                 |     |
| 44 |                    | investigators                                                         |     |
| 45 |                    |                                                                       |     |
| 46 |                    |                                                                       |     |
| 47 |                    |                                                                       |     |
| 48 |                    |                                                                       |     |
| 49 |                    |                                                                       |     |
| 50 |                    |                                                                       |     |
| 51 | Ancillary and post | <a href="#">#30</a> Provisions, if any, for ancillary and post-trial  | N/A |
| 52 | trial care         | care, and for compensation to those who suffer                        |     |
| 53 |                    | harm from trial participation                                         |     |
| 54 |                    |                                                                       |     |
| 55 |                    |                                                                       |     |
| 56 |                    |                                                                       |     |
| 57 |                    |                                                                       |     |
| 58 |                    |                                                                       |     |
| 59 |                    |                                                                       |     |
| 60 |                    |                                                                       |     |

|    |                       |                      |                                                  |                   |
|----|-----------------------|----------------------|--------------------------------------------------|-------------------|
| 1  | Dissemination         | <a href="#">#31a</a> | Plans for investigators and sponsor to           | 9, 13             |
| 2  |                       |                      |                                                  |                   |
| 3  | policy: trial results |                      | communicate trial results to participants,       |                   |
| 4  |                       |                      | healthcare professionals, the public, and other  |                   |
| 5  |                       |                      | relevant groups (eg, via publication, reporting  |                   |
| 6  |                       |                      | in results databases, or other data sharing      |                   |
| 7  |                       |                      | arrangements), including any publication         |                   |
| 8  |                       |                      | restrictions                                     |                   |
| 9  |                       |                      |                                                  |                   |
| 10 | Dissemination         | <a href="#">#31b</a> | Authorship eligibility guidelines and any        | See supplementary |
| 11 |                       |                      | intended use of professional writers             | file              |
| 12 | policy: authorship    |                      |                                                  |                   |
| 13 |                       |                      |                                                  |                   |
| 14 | Dissemination         | <a href="#">#31c</a> | Plans, if any, for granting public access to the |                   |
| 15 |                       |                      | full protocol, participant-level dataset, and    |                   |
| 16 | policy: reproducible  |                      | statistical code                                 |                   |
| 17 | research              |                      |                                                  |                   |
| 18 |                       |                      |                                                  |                   |
| 19 | Informed consent      | <a href="#">#32</a>  | Model consent form and other related             | Approved consents |
| 20 |                       |                      | documentation given to participants and          | for UK and USA    |
| 21 | materials             |                      | authorised surrogates                            | available         |
| 22 |                       |                      |                                                  |                   |
| 23 | Biological            | <a href="#">#33</a>  | Plans for collection, laboratory evaluation, and | 8                 |
| 24 |                       |                      | storage of biological specimens for genetic or   |                   |
| 25 | specimens             |                      | molecular analysis in the current trial and for  |                   |
| 26 |                       |                      | future use in ancillary studies, if applicable   |                   |
| 27 |                       |                      |                                                  |                   |

28 The SPIRIT checklist is distributed under the terms of the Creative Commons Attribution License CC-  
 29 BY-ND 3.0. This checklist can be completed online using <https://www.goodreports.org/>, a tool made  
 30 by the [EQUATOR Network](#) in collaboration with [Penelope.ai](#)

# BMJ Open

**Assessing the efficacy, safety and utility of 6 month day-and-night automated closed-loop insulin delivery under free living conditions compared to insulin pump therapy in children and adolescents with type 1 diabetes: an open-label, multi-centre, multi-national, single-period, randomised, parallel group study protocol**

|                               |                                                                                                                                                                                                                                                                                                                                                                                                                                                                                                                                                                                                                                                                                                                                                                                                                                                                                                                                                                                                                                                                                                                                                                                                                                                                                                                                                                                                                                                                                                                                                                                                                                                                                                                                                                                                                                                                                                                                                  |
|-------------------------------|--------------------------------------------------------------------------------------------------------------------------------------------------------------------------------------------------------------------------------------------------------------------------------------------------------------------------------------------------------------------------------------------------------------------------------------------------------------------------------------------------------------------------------------------------------------------------------------------------------------------------------------------------------------------------------------------------------------------------------------------------------------------------------------------------------------------------------------------------------------------------------------------------------------------------------------------------------------------------------------------------------------------------------------------------------------------------------------------------------------------------------------------------------------------------------------------------------------------------------------------------------------------------------------------------------------------------------------------------------------------------------------------------------------------------------------------------------------------------------------------------------------------------------------------------------------------------------------------------------------------------------------------------------------------------------------------------------------------------------------------------------------------------------------------------------------------------------------------------------------------------------------------------------------------------------------------------|
| Journal:                      | <i>BMJ Open</i>                                                                                                                                                                                                                                                                                                                                                                                                                                                                                                                                                                                                                                                                                                                                                                                                                                                                                                                                                                                                                                                                                                                                                                                                                                                                                                                                                                                                                                                                                                                                                                                                                                                                                                                                                                                                                                                                                                                                  |
| Manuscript ID                 | bmjopen-2018-027856.R2                                                                                                                                                                                                                                                                                                                                                                                                                                                                                                                                                                                                                                                                                                                                                                                                                                                                                                                                                                                                                                                                                                                                                                                                                                                                                                                                                                                                                                                                                                                                                                                                                                                                                                                                                                                                                                                                                                                           |
| Article Type:                 | Protocol                                                                                                                                                                                                                                                                                                                                                                                                                                                                                                                                                                                                                                                                                                                                                                                                                                                                                                                                                                                                                                                                                                                                                                                                                                                                                                                                                                                                                                                                                                                                                                                                                                                                                                                                                                                                                                                                                                                                         |
| Date Submitted by the Author: | 20-Apr-2019                                                                                                                                                                                                                                                                                                                                                                                                                                                                                                                                                                                                                                                                                                                                                                                                                                                                                                                                                                                                                                                                                                                                                                                                                                                                                                                                                                                                                                                                                                                                                                                                                                                                                                                                                                                                                                                                                                                                      |
| Complete List of Authors:     | <p>Musolino, Gianluca; Wellcome Trust-MRC Institute of Metabolic Science, University of Cambridge; University of Cambridge, Department of Paediatrics</p> <p>Allen, Janet; Wellcome Trust-MRC Institute of Metabolic Science, University of Cambridge ; University of Cambridge, Department of Paediatrics</p> <p>Hartnell, Sara; Cambridge University Hospitals NHS Foundation Trust, Department of Diabetes and Endocrinology</p> <p>Wilinska, Malgorzata; Wellcome Trust-MRC Institute of Metabolic Science, University of Cambridge ; University of Cambridge, Department of Paediatrics</p> <p>Tauschmann, Martin; Wellcome Trust-MRC Institute of Metabolic Science, University of Cambridge; Medical University of Vienna, Department of Pediatrics and Adolescent Medicine</p> <p>Boughton, Charlotte; Wellcome Trust-MRC Institute of Metabolic Science, University of Cambridge</p> <p>Campbell, Fiona; Leeds Children's Hospital, Department of Paediatric Diabetes</p> <p>Denvir, Louise; Nottingham University Hospitals NHS Trust, Department of Paediatric Diabetes and Endocrinology</p> <p>Trevelyan, Nicola; Southampton Children's Hospital, Southampton General Hospital</p> <p>Wadwa, Paul; Barbara Davis Center for Childhood Diabetes, University of Colorado</p> <p>DiMeglio, Linda; Indiana University School of Medicine, Division of Pediatric Endocrinology and Diabetology and Wells Center for Pediatric Research, Department of Pediatrics</p> <p>Buckingham, Bruce A.; Stanford University, Division of Pediatric Endocrinology</p> <p>Weinzimer, Stuart; Yale University, Department of Pediatrics</p> <p>Acerini, Carlo; Wellcome Trust-MRC Institute of Metabolic Science, University of Cambridge ; University of Cambridge, Department of Paediatrics</p> <p>Hood, Korey; Stanford University, Division of Pediatric Endocrinology</p> <p>Fox, Steven; University of Southern California, Department of</p> |

1  
2  
3  
4  
5  
6  
7  
8  
9  
10  
11  
12  
13  
14  
15  
16  
17  
18  
19  
20  
21  
22  
23  
24  
25  
26  
27  
28  
29  
30  
31  
32  
33  
34  
35  
36  
37  
38  
39  
40  
41  
42  
43  
44  
45  
46  
47  
48  
49  
50  
51  
52  
53  
54  
55  
56  
57  
58  
59  
60

|                                    |                                                                                                                                                                                                                                                                                                                                                                                                                            |
|------------------------------------|----------------------------------------------------------------------------------------------------------------------------------------------------------------------------------------------------------------------------------------------------------------------------------------------------------------------------------------------------------------------------------------------------------------------------|
|                                    | Pharmaceutical and Health Economics, School of Pharmacy<br>Kollman, Craig; Jaeb Center for Health Research<br>Sibayan, Judy; Jaeb Center for Health Research<br>Borgman, Sarah; Jaeb Center for Health Research<br>Cheng, Peiyao; Jaeb Center for Health Research<br>Hovorka, Roman; Wellcome Trust-MRC Institute of Metabolic Science,<br>University of Cambridge ; University of Cambridge, Department of<br>Paediatrics |
| <b>Primary Subject Heading</b> :   | Paediatrics                                                                                                                                                                                                                                                                                                                                                                                                                |
| <b>Secondary Subject Heading</b> : | Diabetes and endocrinology                                                                                                                                                                                                                                                                                                                                                                                                 |
| <b>Keywords</b> :                  | Type 1 diabetes, Closed-loop, Artificial pancreas                                                                                                                                                                                                                                                                                                                                                                          |
|                                    |                                                                                                                                                                                                                                                                                                                                                                                                                            |

SCHOLARONE™  
Manuscripts

1  
2  
3 **Assessing the efficacy, safety and utility of 6 month day-and-night automated closed-**  
4 **loop insulin delivery under free living conditions compared to insulin pump therapy in**  
5 **children and adolescents with type 1 diabetes: an open-label, multi-centre, multi-**  
6 **national, single-period, randomised, parallel group study protocol**  
7

8  
9 <sup>1,3</sup>Musolino G, <sup>1,3</sup>Allen JM, <sup>2</sup>Hartnell S, <sup>1,3</sup>Wilinska ME, <sup>1,4</sup>Tauschmann M, <sup>1</sup>Boughton C,  
10 <sup>5</sup>Campbell F, <sup>6</sup>Denvir L, <sup>7</sup>Trevelyan N, <sup>8</sup>Wadwa RP, <sup>9</sup>DiMeglio LA, <sup>10</sup>Buckingham BA,  
11 <sup>11</sup>Weinzimer SA, <sup>1,3</sup>Acerini CL, <sup>10</sup>Hood KK, <sup>12</sup>Fox DS, <sup>13</sup>Kollman C, <sup>13</sup>Sibayan J, <sup>13</sup>Borgman S,  
12 <sup>13</sup>Cheng P, and <sup>1,3</sup>Hovorka R on behalf of DAN05 Consortium  
13  
14

15  
16 <sup>1</sup>Wellcome Trust-MRC Institute of Metabolic Science, University of Cambridge, Cambridge, UK

17 <sup>2</sup>Department of Diabetes & Endocrinology, Cambridge University Hospitals NHS Foundation Trust,  
18 Cambridge, UK

19 <sup>3</sup>Department of Paediatrics, University of Cambridge, Cambridge, UK

20 <sup>4</sup>Department of Pediatrics and Adolescent Medicine, Medical University of Vienna, Austria

21 <sup>5</sup>Leeds Children's Hospital, Department of Paediatric Diabetes, Leeds, UK

22 <sup>6</sup>Department of Paediatric Diabetes and Endocrinology, Nottingham University Hospitals NHS Trust,  
23 Nottingham, UK

24 <sup>7</sup>Southampton Children's Hospital, Southampton General Hospital, Southampton, UK

25 <sup>8</sup>Barbara Davis Center for Childhood Diabetes, University of Colorado, Aurora, CO, USA

26 <sup>9</sup>Division of Pediatric Endocrinology and Diabetology and Wells Center for Pediatric Research,  
27 Department of Pediatrics, Indiana University School of Medicine, Indianapolis, IN, USA

28 <sup>10</sup>Division of Pediatric Endocrinology, Stanford University, Stanford, CA, USA

29 <sup>11</sup>Department of Pediatrics, Yale University, New Haven, CT, USA

30 <sup>12</sup>Department of Pharmaceutical and Health Economics, School of Pharmacy, University of Southern  
31 California, Los Angeles, CA, USA

32 <sup>13</sup>Jaeb Center for Health Research, Tampa, FL, USA  
33  
34  
35  
36  
37  
38  
39  
40  
41  
42

### 43 **Correspondence**

44 Roman Hovorka, PhD

45 University of Cambridge Metabolic Research Laboratories and NIHR Cambridge Biomedical  
46 Research Centre,  
47

48 Wellcome Trust-MRC Institute of Metabolic Science, Box 289,  
49

50 Addenbrooke's Hospital, Hills Road, Cambridge CB2 0QQ, UK

51 Tel: +44 1223 762 862, fax: +44 1223 330 598, e-mail: rh347@cam.ac.uk  
52  
53  
54  
55

56 **Key Words:** Type 1 diabetes, Closed-loop, Artificial pancreas  
57  
58

59 **Word count abstract:** 299 (maximum 300)

60 **Word count paper:** 4000 (maximum 4000)



## ABSTRACT

### Introduction

Closed-loop systems titrate insulin based on sensor glucose levels, providing novel means to reduce the risk of hypoglycaemia while improving glycaemic control. We will assess effectiveness of 6-month day-and-night closed-loop insulin delivery compared to usual care (conventional or sensor-augmented pump therapy) in children and adolescents with type 1 diabetes.

### Methods and analysis

The trial adopts an open-label, multi-centre, multi-national (UK and USA), randomised, single-period, parallel design. Participants (n=130) are children and adolescents (age  $\geq 6$  and  $<19$  years) with type 1 diabetes for at least 1 year, and insulin pump use for at least 3 months with sub-optimal glycaemic control [glycated haemoglobin  $\geq 58$ mmol/mol (7.5%) and  $\leq 86$ mmol/mol (10%)]. After a 2-3 week run-in period, participants will be randomised to 6-month use of hybrid closed-loop insulin delivery, or to usual care. Analyses will be conducted on an intention to treat basis. The primary outcome is glycated haemoglobin at 6 months. Other key endpoints include time in the target glucose range (3.9 to 10mmol/l, 70 to 180mg/dl), mean sensor glucose, and time spent above and below target. Secondary outcomes include standard deviation and coefficient of variation of sensor glucose levels, time with sensor glucose levels  $<3.5$ mmol/l (63mg/dl) and  $<3.0$ mmol/l (54mg/dl), area under the curve of glucose  $<3.5$ mmol/l (63mg/dl), time with glucose levels  $>16.7$ mmol/l (300mg/dl), area under the curve of glucose  $>10.0$ mmol/l (180mg/dl), total, basal and bolus insulin dose, body mass index z-score, and blood pressure. Cognitive, emotional and behavioural characteristics of participants and caregivers and their responses to the closed-loop and clinical trial will be assessed. An incremental cost-effectiveness ratio (ICER) for closed-loop will be estimated.

### Ethics and dissemination

Cambridge South Research Ethics Committee and Jaeb Center for Health Research Institutional Review Office approved the study. The findings will be disseminated by peer-review publications and conference presentations.

**Trial registration** NCT02925299 (ClinicalTrials.gov).

### Strengths and limitations of this study

- The study adopts an open-label, multi-centre, multi-national, randomised, parallel design: it includes a large group of children and adolescents across wide geographical locations
- The trial adopts a 6-month follow-up period of hybrid closed-loop insulin delivery during unrestricted living
- Participants in the two study groups will have an equal number of study visits
- The study design excludes participants with recurrent incidents of severe hypoglycaemia or diabetic ketoacidosis during the previous 6 months, living alone, and those with glycated haemoglobin below 58mmol/mol (7.5%) and above 86mmol/mol (10%) and with high or very low daily insulin requirements (total daily insulin dose  $\geq 2$  IU/kg/day or  $< 15$  IU/day)
- All participants are already pump users, somewhat limiting generalizability

## INTRODUCTION

Type 1 diabetes is characterised by a deficiency of insulin caused by immunologically-mediated damage to pancreatic beta cells, leading to raised blood glucose levels. Diabetes is one of the most common metabolic conditions. It is estimated that in 2017 1,100,000 children and adolescents (0-19 years) worldwide had type 1 diabetes and that the number of newly diagnosed cases was over 130,000 (1). The incidence rate in children is increasing by approximately 3-4% per year with geographic differences (1). Earlier onset can result in diabetes complications appearing at a younger age, whilst dependence on lifelong insulin imposes a heavy burden on children, carers as well as health care systems.

Despite continuing progress, glycaemic control in children and adolescents with type 1 diabetes remains suboptimal (2). The achievement of recommended treatment goals is limited by the risk of hypoglycaemia. Even in those with the desired level of glycaemic control, non-physiological glucose excursions occur with periods of silent hyper- and hypoglycaemia (3, 4). Individuals have blunted counter-regulatory responses to hypoglycaemia impairing recovery and increasing the threat of future episodes (5). Recurrent episodes may lead to hypoglycaemic unawareness, increasing the risk of severe hypoglycaemia (6). Hypoglycaemia has psychological consequences including the fear of hypoglycaemia with resulting maladaptive coping behaviours, such as excessive eating or under-insulinising, that may negatively impact glycaemic control (7).

The development of continuous glucose monitoring has been a major advance (8-11). Sensor-augmented pumps combine real-time continuous glucose monitoring with insulin pump (12). Insulin pumps with low glucose suspend feature have been shown to reduce hypoglycaemia (13). These systems, however, overall provide little or no automation to adjust insulin delivery to match glucose excursions.

An artificial pancreas (a closed-loop system) adjusts insulin automatically and represents a realistic treatment option for type 1 diabetes (14). The closed-loop control algorithm translates, in real-time, sensor glucose levels received from the glucose monitoring device and computes the amount of insulin to be delivered by the coupled insulin pump. Hybrid closed-loop systems automatically titrate insulin delivery although the user manages insulin boosts at meal time (15). In 2017, the first closed-loop system entered clinical use in the USA (16).

Closed-loop systems may improve glycaemic control while reducing the risk of hypoglycaemia (17). They have been evaluated in children and adolescents under controlled laboratory conditions (18-20) and in home settings (21-24). Investigations in adults have also been conducted (22, 25, 26). Psychosocial assessments support acceptability and benefits of this therapeutic approach among children/adolescents and carers (27). Closed-loop systems are associated with increased time in near normoglycaemia and reduced time in hypoglycaemia and hyperglycaemia (28). So far, evaluations have been limited to 3 months (22).

The present study will assess the efficacy, safety, utility and acceptability of 6-month day-and-night hybrid closed-loop insulin delivery during unrestricted living in comparison to usual care in children and adolescents with type 1 diabetes.

## METHODS AND ANALYSIS

### Overview

This trial adopts an open-label, multi-centre, multi-national, single-period, randomised, parallel group design, involving a 6-month home study period during which day-and-night glucose levels will be managed either by a closed-loop system (intervention group) or by insulin pump therapy (control group) (Figure 1). We aim to recruit up to 150 children and adolescents aged  $\geq 6$  to  $< 19$  years with type 1 diabetes on insulin pump therapy (approximately equal proportion of those aged  $\geq 6$  to 12 years and 13 to  $< 19$  years, a minimum quota of 25% participants with baseline glycated haemoglobin  $> 69$  mmol/mol,  $> 8.5\%$ ). Inclusion and exclusion criteria are summarised in Table 1.

The University of Cambridge (UK) and Jaeb Center for Health Research (USA) are the coordinating centres. Clinical centres include:

- 1) Addenbrooke's Hospital, Cambridge, UK
- 2) Barbara Davis Center for Childhood Diabetes, Aurora, USA
- 3) Indiana University, Indianapolis, USA
- 4) Leeds Teaching Hospital, Leeds, UK
- 5) Nottingham Children's Hospital, Nottingham, UK
- 6) Southampton Children's Hospital, Southampton, UK
- 7) Stanford University, Stanford, California, USA
- 8) Yale University, New Haven, Connecticut, USA

Cognitive, emotional, and behavioural characteristics of participants and family members and their response to the closed-loop will be assessed gathering both quantitative (validated surveys) and qualitative data (focus groups). Written informed consent/assent will be obtained from all participants and guardians before any study-related activities.

### Study schedule

The study will comprise up to 8 visits and 6 telephone/email contacts (see Table 2 and Table 3). The maximum study duration is 8 months.

### Screening and baseline assessment

At screening, blood samples for full blood count, liver, thyroid function and anti-transglutaminase antibodies (with IgA levels if not done within previous 12 months) will be taken. Non-hypoglycaemia C-peptide, glucose and glycated haemoglobin will be measured and a urine pregnancy test in females of child-bearing potential will be performed. Surveys investigating participants' quality of life, psychosocial and cognitive functioning, and response to their current treatment will be distributed. Participants will be fitted with a blinded continuous glucose monitoring device (Libre Pro, Abbott Diabetes Care, Alameda, CA, USA) that will be worn during the run-in period at home for up to 14 days.

### Run-in period

During a 2-3 week run-in period, subjects will continue using their own insulin pump. Data obtained from blinded glucose sensors and pump downloads may be utilised for treatment adjustments. The run-in period may be extended/repeated if no or limited sensor data is

1  
2  
3 available. At least 10 days of sensor data need to be collected. A longer run-in will not be  
4 used for additional fine-tuning of treatment adjustments.  
5

## 6 7 **Randomisation**

8  
9 Central randomisation software will be used with stratification by site and baseline glycated  
10 haemoglobin. The randomisation ratio will be 1:1 within each stratum. The randomisation list  
11 created by the study statistician is encrypted.  
12

## 13 **Treatment period**

### 14 15 *1. Automated day-and-night hybrid closed-loop insulin delivery combined with low glucose* 16 *suspend feature (interventional arm)* 17

18  
19 Participants allocated to the closed-loop group will be trained on using the study insulin pump  
20 (modified Medtronic 640G pump, Medtronic, Northridge, CA, USA) and real-time continuous  
21 glucose sensor (Guardian 3, Medtronic). This represents a complex intervention over usual  
22 care, especially for subjects under pump therapy alone. Once deemed competent with the  
23 use of the devices, participants will receive training required for the closed-loop system.  
24 Competency on the use of closed-loop will be evaluated. During closed-loop period,  
25 participants will program meal boluses estimating ingested carbohydrate amounts. Specific  
26 instructions during closed-loop related to exercise management, sick day rules, hypo- and  
27 hyperglycaemia management and technical troubleshooting will be provided.  
28  
29

### 30 *2. Usual care (conventional or sensor-augmented pump therapy) (control arm)* 31

32  
33 Participants in control arm will receive refresher training on key aspects of insulin pump  
34 therapy (advanced boluses, temporary basal, infusion set change, sensor calibrations).  
35 During 6-month control intervention period, subjects will continue using either their own  
36 insulin pump alone or combined with their pre-study glucose monitoring device.  
37

38  
39 At the study initiation visit, participants in both study groups will be fitted with a blinded  
40 continuous glucose monitoring system (Libre Pro) that will be worn for up to 14 days. If the  
41 sensor fails or gets detached, another sensor may be inserted. The sensor data may be used  
42 to optimise insulin delivery.  
43

## 44 **Assessments at 3 months and 6 months**

45  
46 A blood sample will be collected for measurement of glycated haemoglobin. A urine  
47 pregnancy test in females of child-bearing potential will be performed. As per usual clinical  
48 practice, glucometer downloads and pump data will be reviewed, and adjustments to insulin  
49 pump settings will be made as required. Validated surveys evaluating the impact of the  
50 devices employed on quality of life, psychosocial and cognitive functioning, diabetes  
51 management and treatment satisfaction will be administered. At the 3-month follow-up visit,  
52 participants in both study groups will be fitted with blinded continuous glucose monitoring  
53 systems (Libre Pro). For assessment of glycaemic control during the final 3-month period of  
54 the trial, participants in both study groups will be fitted with a blinded continuous glucose  
55 monitoring system 2 to 4 weeks before the end of study. At the 6-month visit, the same  
56 procedures as at the 3-month visit will be followed. A subset of subjects/guardians will be  
57 invited to join follow-up focus groups.  
58  
59  
60

### **Study contacts during 6-month study period**

Participants in the two study groups will have an equal number of contact visits. The first planned contact will occur within 24-48 hours after study initiation visit. During the first 2 weeks of the study period, participants will be contacted weekly. Thereafter, participants will be contacted monthly. Subjects/parents and/or the clinical team are free to adjust insulin therapy, but no active treatment optimisation will be undertaken by the research team.

### **Devices download**

As per usual care, insulin pump and blood glucose meter will be downloaded (Medtronic CareLink) every clinic visit (at least every 3 months).

### **Closed-loop system**

The FlorenceM closed-loop system (Figure 2) incorporates a computer-based algorithm hosted by an Android smartphone, which interacts wirelessly with the modified investigational-use-only 640G pump through a proprietary translator device included in the smartphone's enclosure. By using the information received from the glucose sensor, every ten minutes the system computes a new temporary basal insulin infusion rate, which is automatically sent to the insulin pump. The treat-to-target control algorithm aims to achieve a default glucose level of 5.8mmol/l (104mg/dl) and regulates the actual level depending on fasting versus postprandial status and the accuracy of model-based glucose predictions. No remote monitoring is planned. While the system is charging and connected to internet, the device uploads data on a server. The study pump comprises continuous glucose monitoring receiver and provides hypoglycaemia and hyperglycaemia alarms, which can be activated/personalised by the participants.

### **Safety precautions during closed-loop**

Participants will be asked to perform capillary calibrations before breakfast and dinner. If sensor glucose value is  $>3.0\text{mmol/l}$  (54mg/dl) different from capillary glucose level, the sensor will be recalibrated. These directions are based on an in-silico simulation of hypo- and hyperglycaemia risk using the validated Cambridge simulator (29). If sensor glucose becomes unavailable or the smartphone is not in range/operational, the pump will automatically deliver the pre-programmed insulin as set on the pump within 30 minutes. Safety rules limit maximum insulin infusion and suspend insulin delivery when sensor glucose is  $\leq 4.3\text{mmol/l}$  (77mg/dl) or when glucose is rapidly decreasing. In case of a communication failure between control algorithm device and the study pump, the low-glucose feature will interrupt insulin delivery, provided sensor glucose is available. Low glucose suspend/predictive low glucose management will be initially set to suspend insulin delivery at sensor glucose values of  $3.9\text{mmol/l}$  (70mg/dl) or less, after which the setting could range from 2.8 to  $5.0\text{mmol/l}$  (50mg/dl to 90mg/dl). Predictive low glucose suspend will not be used. Insulin delivery will be resumed in accordance of the low glucose suspend feature implemented on the study pump. A 24-hour local telephone helpline will be available for any technical device issues or problems related to diabetes management.

### **Participant withdrawal criteria**

The following pre-randomisation withdrawal criteria will apply:

- 1
- 2
- 3 1. Subject/caregiver is unable to demonstrate safe use of study insulin pump as judged
- 4 by the investigator
- 5 2. Subject/caregiver fails to demonstrate compliance with insulin pump and capillary
- 6 self-monitoring of blood glucose during run-in
- 7
- 8

9 Pre- and post-randomisation withdrawal criteria will comprise:

- 10
- 11 3. Subjects/caregivers may terminate participation in the study at any time without
- 12 necessarily giving a reason and without any personal disadvantage
- 13 4. Significant protocol violation or non-compliance
- 14 5. Two distinct episodes of severe hypoglycaemia
- 15 6. Two distinct episodes of diabetic ketoacidosis unrelated to infusion site failure and
- 16 related to the use of the closed-loop
- 17 7. Decision by the investigator or the sponsor that termination is in the subject's best
- 18 medical interest
- 19 8. Allergic reaction to insulin
- 20 9. Allergic reaction to adhesive surface of infusion set or glucose sensor
- 21 10. Subject becomes pregnant during the study period
- 22
- 23
- 24
- 25

26 Subjects withdrawn due to reasons 4-10 will be invited to provide blood sample at the end of

27 the planned study intervention for the assessment of glycated haemoglobin.

28

### 29 **Psychosocial evaluations**

30

31 Cognitive, emotional, and behavioural characteristics of participating subjects and family

32 members and their response to the closed-loop system and clinical trial will be assessed

33 using validated surveys and focus groups. Surveys will be completed at baseline (prior to

34 randomisation), at 3, and 6 months.

35

36

37 To assess how strongly participants value the benefits of the closed-loop (compared with the

38 usual care), we will conduct a discrete choice experiment (DCE). In the DCE, respondents

39 will answer a series of binary choice questions (e.g., "Given a choice between option A or B,

40 which would you prefer...") where those two options offer differing strengths and

41 weaknesses. By varying the performance levels of these different desirable characteristics,

42 we can assess their relative importance.

43

44

45

46 Focus groups will be completed at the end of the study (6 months). We will conduct virtual

47 focus groups using HIPAA-approved software supported by Stanford University. Focus

48 groups will be run with 3-6 participants and we will work from a script of open-ended

49 questions used to gather feedback and reactions to the closed-loop system/insulin pump

50 therapy, the clinical trial and quality of life changes. Sessions will be audio- and video-taped

51 and transcribed by a professional transcription service.

52

### 53 **Blood samples**

54

55 Screening blood samples will be measured locally. Additional blood samples will be taken for

56 the measurement of non-hypoglycaemia C-peptide and glycated haemoglobin at a central

57 laboratory. Glycated haemoglobin will be assessed at baseline, 3, and 6 months. At each

58 time point, glycated haemoglobin will be measured locally (clinical care) and centrally

59 (analysis of study endpoints). The central analysis will be performed using an International

60 Federation of Clinical Chemistry and Laboratory Medicine aligned method.

## Patient and Public Involvement

The research question and study endpoints are based on feedback from participants of previous studies and in line with prioritising by stakeholders (30). The study design and the assessment of the burden of the intervention were reviewed by focus groups. Results will be disseminated to participants and general public through social media and will be made available on the sponsor's website.

## Statistical analysis

### *Primary Outcome Analysis*

The primary analysis will follow the intention-to-treat principle. Data from all randomised subjects will be analysed in the group to which the subjects were assigned through randomisation regardless of the actual treatment received. Data will not be truncated due to protocol deviations.

The primary analysis will evaluate between group differences in glycated haemoglobin levels at the end of treatment period. A 5% significance level will be considered statistically significant for the primary outcome comparison.

Means  $\pm$  standard deviation (SD) values or percentiles appropriate to the distribution will be reported for the primary outcome by treatment group. The two treatment groups will be compared using a linear regression model adjusting for glycated haemoglobin at baseline, age, and clinical centre as random effect. A 95% confidence interval will be reported for the difference between the randomisation groups based on the linear regression model. Residual values will be examined for an approximate normal distribution. If values are highly skewed, then a transformation or robust statistical methods (e.g., non-parametric or MM estimation) will be used instead. A detailed analysis plan will be provided separately.

### *Other Key Endpoints*

For the following key endpoints at 6 months, the familywise type I error rate will be controlled at two-sided  $\alpha = 0.05$ . A gatekeeping strategy will be used, where the primary endpoint will be tested first, if passing the significance testing, other key endpoints will be tested in the order listed below using the fixed-sequence method at  $\alpha = 0.05$ .

- Time spent in the target glucose range from 3.9 to 10.0mmol/l (70 to 180mg/dl)
- Mean sensor glucose
- Time spent above target glucose 10.0mmol/l (180mg/dl)
- Time spent below target glucose 3.9mmol/l (70mg/dl)

If a non-significant ( $p > 0.05$ ) result is obtained for any outcome on this list, no further hypothesis testing will be performed for any metrics further down on the list.

### *Secondary Efficacy Analyses*

For these exploratory analyses, the false discovery rate will be used to account for multiple comparisons:

#### Continuous glucose monitoring derived indices

- Standard deviation of sensor glucose
- Sensor glucose variability measured with the coefficient of variation
- The time with glucose  $< 3.5$ mmol/l (63mg/dl)



- The time with glucose <3.0mmol/l (54mg/dl)
- Area under the curve of glucose below 3.5mmol/l (63mg/dl)
- The time spent in significant hyperglycaemia (glucose >16.7mmol/l, 300mg/dl)
- Area under the curve of glucose above 10.0mmol/l (180mg/dl)

The following sensor glucose metrics will also be calculated separately for day-time period (06:00-23:59) and night-time period (00:00-05:59):

- The time with glucose from 3.9 to 10.0mmol/l (70-180mg/dl)
- Mean glucose
- Glucose variability as measured by standard deviation
- The time with glucose <3.5mmol/l (63mg/dl)

#### Binary metrics for glycated haemoglobin

- HbA1c <53mmol/mol (7.0%)
- HbA1c <58mmol/mol (7.5%)
- Relative reduction  $\geq 10\%$  from baseline
- Absolute reduction  $\geq 0.5\%$  from baseline
- Absolute reduction  $\geq 1\%$  from baseline
- Absolute reduction  $\geq 1\%$  from baseline or HbA1c <53mmol/mol (7.0%)

#### Insulin and other endpoints

- Total, basal and bolus insulin dose
- Body weight (BMI z-score)
- Blood pressure

The above described glycaemic metrics will be based on sensor glucose levels collected during post-randomisation periods of blinded sensors wear.

### **Safety analyses**

The following events will be recorded and compared between treatment groups:

- Number of severe hypoglycaemia events per subject and incidence rate per 100 person-years
- Number of diabetic ketoacidosis events per subject and incidence rate per 100 person-years
- Sensor glucose-measured hypoglycaemic events per week (>15 minutes with glucose <3mmol/l, 54mg/dl)
- Sensor glucose-measured hyperglycaemic events per week (>15 minutes with glucose >16.7mmol/l, 300mg/dl)
- Proportion of subjects with worsening of glycated haemoglobin from baseline to 6 months by >0.5%

If we record enough observed events to allow formal statistical modelling for above safety outcomes, we will perform the following analyses. Poisson regression models will be constructed to compare the treatment group difference for event rates by adjusting for age, baseline glycated haemoglobin and random site effect. If any outlier exists, a robust Poisson regression model will be used instead. For binary glycated haemoglobin outcome, logistic

1  
2  
3 regression models will be used to compare the treatment group difference by adjusting for  
4 age, baseline glycated haemoglobin and random site effect.  
5

### 6 7 **Utility assessments**

8 The following system use/function outcomes in the intervention arm will be tabulated:  
9

- 10 • Number of low glucose suspend events
  - 11 • Percentage of time when closed-loop system use is functioning
  - 12 • Percentage of time when continuous glucose monitoring is used
- 13  
14  
15

### 16 17 **Subgroup analyses**

18 No subgroups were considered during the power calculations. Interpretation of any subgroup  
19 analyses will depend on whether the overall analysis demonstrates a significant treatment  
20 group difference. In the absence of such difference, if performed, the subgroup analyses will  
21 be interpreted with caution.  
22

### 23 24 **Psychosocial analyses**

25 Quantitative data on usability and satisfaction will be analysed using simple descriptive  
26 statistics. Additionally, we will analyse scores from the cognitive, emotional, and behavioural  
27 assessments to determine if changes occur over time and between groups.  
28

29  
30 We will construct predictive models in the general linear framework to examine the  
31 associations with primary outcomes. For the discrete choice experiment (DCE), the strength  
32 of preference (importance) of each performance attribute will be estimated from the pooled  
33 DCE responses using standard regression analysis techniques.  
34  
35

36 Qualitative data will be analysed using Atlas.ti (release 6.0; Scientific Software Development  
37 GmbH, Berlin, Germany) to organize and manage the entire corpus of focus group data.  
38

### 39 40 **Cost utility analyses**

41 To inform reimbursement and other policy decision-making, we will conduct a cost utility  
42 analysis on the benefits of closed-loop. The analysis timeframe for both costs and benefits  
43 will include not just the study period, but also anticipated future impacts. Costs will be  
44 denominated in US Dollars. They will be framed to include both health-related expenditures  
45 and any realised or projected incremental health cost savings. Utility will be quantified in  
46 quality adjusted life years (QALYS). We will elicit health related quality of life (HRQOL)  
47 during the study period using two preference based measures of health status: the Child  
48 Health Utility 9D (31) and the EuroQol 5D-Y (32). Future health and cost impacts, beyond the  
49 study period, will be estimated using numerical modelling. Incremental cost effectiveness  
50 ratios, comparing the closed-loop system to usual care will be calculated.  
51  
52  
53

### 54 55 **Interim analysis**

56 We will not perform an interim analysis.  
57  
58  
59  
60

## **Per-protocol analysis**

We will conduct a per-protocol analysis in order to replicate the primary analysis, but limited to participants who did not withdraw from the study (withdrawals excluded even if they return for a 6-month glycated haemoglobin measurement) and used closed-loop for at least 70% of the time (intervention group).

## **Power calculation**

Data from the JDRF Continuous Glucose Monitoring Randomised Clinical Trial (33) from subjects who would have met the eligibility criteria for the current trial were used to project the distribution of baseline and 6-month glycated haemoglobin. Among N=53 subjects meeting the eligibility criteria in the JDRF CGM RCT (n=20 subjects 8 to 12 years of age and n=33 subjects 13 to 18 years of age), the upper limit of the confidence interval for the effective SD of glycated haemoglobin was 0.71%. With this effective SD, for a true 0.4% reduction in glycated haemoglobin, power = 85%, 2-sided type 1 error = 5%, 1:1 randomisation, total sample size is estimated to be 116. Adding 10% for potential dropout/non-compliance results in a final total sample size of approximately 128 (64 in each treatment group).

## **STUDY MANAGEMENT**

### **Data Safety Monitoring Board**

A Data Safety Monitoring Board (DSMB) will be instituted. The DSMB will be notified of all serious adverse events and any unanticipated adverse device effects/events and will perform regular safety data review. The DSMB will report to the National Institute of Diabetes and Digestive and Kidney Diseases (the Funder) any safety concerns and recommendations for suspension or early termination of the trial.

### **Study sponsors**

In the UK the study sponsors are the University of Cambridge and the Cambridge University Hospitals NHS Foundation Trust. Study sponsor in the USA is the Jaeb Center for Health Research.

### **Study management committee**

A study management committee composed of the Chief Investigator, Study Coordinators, and Study Data Manager will meet monthly to discuss the operational aspects of the trial.

### **Data management and monitoring**

Designated personnel from Coordinating Centres will be responsible for maintaining quality assurance and quality control systems to ensure that the trial is conducted and data are generated, documented and reported in compliance with the protocol, Good Clinical Practice, and regulatory requirements.

We will observe confidentiality of subject data. Personal details for each participant with a link to a unique identification number will be held locally on a study screening log in the Trial Master File at each of the investigation centres. These details will not be disclosed at any other stage during the study, and all individual results will remain anonymous.

## Indemnity

Indemnity for any harm arising on the conduct of research will be provided according to arrangements in respective countries:

1) UK - any liability arising from study design will be covered by clinical trial insurance policy organised by the University of Cambridge. National Health Service indemnity cover will apply for any claims arising from management and conduct of research.

2) USA - any liability arising from study design will be under the responsibility of the participants or their insurance company.

## ETHICS AND DISSEMINATION

Approval from independent Research Ethics Committee/Institutional Review Board (UK, East of England-Cambridge South Research Ethics Committee, #16/EE/0380; USA, Jaeb Center for Health Research Institutional Review Board certified by the Office for Human Research Protections, FWA #00000024) has been obtained. The study has undergone a review by regulatory authorities in the UK (Medicines and Healthcare products Regulatory Agency) and in the USA (Food and Drug Administration). All participants will be provided with oral and written information about the trial and procedures involved in the study before obtaining written informed consent. For minors, parents/guardians will provide written informed consent, and written assent will be gained.

Standard operating procedures for monitoring and reporting of all adverse events and adverse device effects will be in place including serious adverse events, serious adverse device effects and specific adverse events, such as severe hypoglycaemia and significant hyperglycaemia with ketosis.

Any substantial amendments to the protocol and other documents shall be submitted to, and approved by, the independent Research Ethics Committee/Institutional Review Board and the regulatory authorities, prior to implementation as per nationally agreed guidelines.

The study started enrolling participants in June 2017 and is expected to complete clinical follow up by November 2019 and to report results in 2020. Trial results will be disseminated in internationally peer-reviewed scientific journals.

### **Acknowledgements**

Jasdip Mangat supported development and validation of closed-loop system. Josephine Hayes, Matthew Haydock and Nicole Ashcroft (Institute of Metabolic Science, University of Cambridge) provided administrative support. NIHR Cambridge Clinical Research Facility will support the research team in their research-related activities. Artificial Pancreas focus group contributors provided feedback on the study design. West Midlands Young Persons Advisory Group reviewed Participant Information Sheets.

### **Contributors**

RH, MEW, FC, LD, NT, RPW, LADM, BAB, SAW, CLA, and KKH co-designed the study. CK and PC designed the statistical plan. GM, JMA, SH, MT, CB, FC, LD, NT, RPW, LADM, BAB, SAW, and CLA screened and enrolled participants, arranged informed consent from the participants, provided patient care, and took samples. KKH devised the human factors assessments. JS, SB coordinated the study. JS managed randomisation. DSF will conduct the cost utility analysis. RH designed and implemented the glucose controller. GM and RH wrote the manuscript. All authors critically reviewed the report. No writing assistance was provided.

### **Funding**

National Institute of Diabetes and Digestive and Kidney Diseases of the National Institutes of Health under Award Number UC4DK108520. Additional support for the artificial pancreas work is from National Institute for Health Research Cambridge Biomedical Research Centre, and Wellcome Strategic Award (100574/Z/12/Z). Medtronic is supplying discounted CGM devices, sensors, and details of communication protocol to facilitate real-time connectivity. Abbott Diabetes Care is providing Libre Pro sensors.

### **Relevant disclosures**

RH reports having received speaker honoraria from Eli Lilly and Novo Nordisk, serving on advisory panel for Eli Lilly and Novo Nordisk, receiving licence fees from BBraun and Medtronic. RH and MEW report patent patents and patent applications.

MT has received speaker honoraria from Medtronic and NovoNordisk.

RPW reports receiving speaker honoraria from Dexcom and serving on advisory panels for Eli Lilly and Novo Nordisk and research support from Bigfoot Biomedical, Dexcom, Lexicon, Mannkind and Novo Nordisk. BAB is on Advisory Boards for Novo-Nordisk and Convatec, has received research support from Medtronic Diabetes, Tandem Diabetes, Insulet, Convatec, and Dexcom. SAW has received speaker honoraria from Medtronic, Insulet, and Tandem, and has received consultant honoraria from Sanofi and Zealand Pharmaceuticals.

KKH has received research support from Dexcom, Inc for an investigator-initiated project; he has received consultant fees from Lilly Innovation Center, Bigfoot Biomedical, and Insulet, Inc. LADM reports grants from Medtronic.

GM, JMA, SH, CB, FC, LD, NT, CLA, DSF, CK, JS, SB, PC declare no competing financial interests exist.

### **Ethics and IRB approvals**

East of England - Cambridge South Research Ethics Committee (UK), Jaeb Center for Health Research Institutional Review (IRB) Office (813-975-8690 or irb@jaeb.org) (USA).

**Provenance and peer review**

Not commissioned, internally peer reviewed.

**Table 1.** Inclusion and exclusion criteria

| <b>Summary of inclusion criteria</b>                                                                                                                                                                                                                                                                                                                                                                                                                                                                                                                                                                                                                                                                                                                                                                                                                                                                                                                                                                                                                                                                                                                                                                                                                                                                                                                                                                                                                                                                                                                                                                                                                                                                                                                                                                                                                                                                                                                                                                                                                                                                                                                                                                                                                                                                                                                                                                                                                                                                                                                                                                                                                                                                                                                                                                                                  |
|---------------------------------------------------------------------------------------------------------------------------------------------------------------------------------------------------------------------------------------------------------------------------------------------------------------------------------------------------------------------------------------------------------------------------------------------------------------------------------------------------------------------------------------------------------------------------------------------------------------------------------------------------------------------------------------------------------------------------------------------------------------------------------------------------------------------------------------------------------------------------------------------------------------------------------------------------------------------------------------------------------------------------------------------------------------------------------------------------------------------------------------------------------------------------------------------------------------------------------------------------------------------------------------------------------------------------------------------------------------------------------------------------------------------------------------------------------------------------------------------------------------------------------------------------------------------------------------------------------------------------------------------------------------------------------------------------------------------------------------------------------------------------------------------------------------------------------------------------------------------------------------------------------------------------------------------------------------------------------------------------------------------------------------------------------------------------------------------------------------------------------------------------------------------------------------------------------------------------------------------------------------------------------------------------------------------------------------------------------------------------------------------------------------------------------------------------------------------------------------------------------------------------------------------------------------------------------------------------------------------------------------------------------------------------------------------------------------------------------------------------------------------------------------------------------------------------------------|
| <ul style="list-style-type: none"> <li>▪ Age ≥6 and &lt;19 years</li> <li>▪ Type 1 diabetes as defined by World Health Organization (34) for at least 1 year</li> <li>▪ Use of an insulin pump for at least 3 months, with good knowledge of insulin self-adjustment by subject or caregiver as judged by the investigator</li> <li>▪ Using U-100 rapid acting insulin analogues Aspart or Lispro only</li> <li>▪ Willing to perform regular finger-prick blood glucose monitoring, with at least 4 blood glucose measurements per day</li> <li>▪ Screening glycated haemoglobin ≥58 mmol/mol (7.5%) and ≤86mmol/mol (10%) based on analysis from local laboratory</li> <li>▪ Literate in English</li> <li>▪ Willing to wear continuous glucose sensor and closed-loop system at home</li> <li>▪ Willing to follow study specific instructions</li> <li>▪ Willing to upload pump and glucose sensor data at regular intervals</li> <li>▪ Access to Wi-Fi</li> <li>▪ Living with someone who is trained to administer glucagon and is able to seek emergency assistance</li> </ul>                                                                                                                                                                                                                                                                                                                                                                                                                                                                                                                                                                                                                                                                                                                                                                                                                                                                                                                                                                                                                                                                                                                                                                                                                                                                                                                                                                                                                                                                                                                                                                                                                                                                                                                                                     |
| <b>Summary of exclusion criteria</b>                                                                                                                                                                                                                                                                                                                                                                                                                                                                                                                                                                                                                                                                                                                                                                                                                                                                                                                                                                                                                                                                                                                                                                                                                                                                                                                                                                                                                                                                                                                                                                                                                                                                                                                                                                                                                                                                                                                                                                                                                                                                                                                                                                                                                                                                                                                                                                                                                                                                                                                                                                                                                                                                                                                                                                                                  |
| <ul style="list-style-type: none"> <li>▪ Living alone</li> <li>▪ Current use of any closed-loop system</li> <li>▪ Any other physical or psychological disease likely to interfere with the normal conduct of the study and interpretation of the study results, as judged by the investigator</li> <li>▪ Untreated coeliac disease, adrenal insufficiency, or untreated thyroid disease</li> <li>▪ Current treatment with drugs known to interfere with glucose metabolism (e.g., systemic corticosteroids, non-selective beta-blockers and monoamine oxidase inhibitors, etc.)</li> <li>▪ Known or suspected allergy to insulin</li> <li>▪ Clinically significant nephropathy (estimated glomerular filtration rate &lt;45ml/min) or on dialysis, neuropathy or active retinopathy (presence of maculopathy or proliferative changes), as judged by the investigator</li> <li>▪ Recurrent incidents of severe hypoglycaemia (&gt;1 episode) during the previous 6 months (adolescents: severe hypoglycaemia is defined as an event requiring assistance of another person to actively administer carbohydrates, glucagon, or take other corrective actions including episodes of hypoglycaemia severe enough to cause unconsciousness, seizures or attendance at hospital; children: severe hypoglycaemia is defined as an event associated with a seizure or loss of consciousness)</li> <li>▪ Recurrent incidents of diabetic ketoacidosis (&gt;1 episode) during the previous 6 months</li> <li>▪ Unwilling to avoid regular use of acetaminophen</li> <li>▪ Lack of reliable telephone facility for contact</li> <li>▪ Total daily insulin dose ≥2 IU/kg/day and &lt;15 IU/day</li> <li>▪ Pregnancy, planned pregnancy, or breast feeding</li> <li>▪ Severe visual or hearing impairment</li> <li>▪ Seizure disorder</li> <li>▪ Medically documented allergy towards the adhesive (glue) of plasters or unable to tolerate tape adhesive in the area of sensor placement</li> <li>▪ Serious skin diseases (e.g., psoriasis vulgaris, bacterial skin diseases) located at places of the body likely to be used for localisation of the glucose sensor</li> <li>▪ Abusing illicit drugs, prescription drugs or alcohol</li> <li>▪ Use of pramlintide (Symlin), or other non-insulin glucose lowering agents including sulphonylureas, biguanides, DPP4-Inhibitors, GLP-1 analogues, SGLT-1/ 2 inhibitors at time of screening</li> <li>▪ Shift work with working hours between 10pm and 8am</li> <li>▪ Sickle cell disease, haemoglobinopathy, or has received red blood cell transfusion or erythropoietin within 3 months prior to time of screening</li> <li>▪ Eating disorder such as anorexia or bulimia</li> <li>▪ Employed by Medtronic Diabetes or with immediate family members employed by Medtronic Diabetes</li> </ul> |

**Table 2.** Schedule of study visits / phone contacts when the participant is randomised to day-and-night closed-loop combined with low glucose feature (intervention group)

|                                         | Visit/<br>Contact                                                                                                            | Description                                                                                                                                            | Start relative to previous /<br>next Visit / Activity                                               | Duration  |
|-----------------------------------------|------------------------------------------------------------------------------------------------------------------------------|--------------------------------------------------------------------------------------------------------------------------------------------------------|-----------------------------------------------------------------------------------------------------|-----------|
| <b>Run-in</b>                           | <b>Visit 1</b>                                                                                                               | Recruitment visit: consent, HbA1c, screening bloods, urine pregnancy test, baseline surveys, blinded CGM training and insertion                        |                                                                                                     | 1-4 hours |
|                                         | <b>Visit 2</b>                                                                                                               | Review of baseline bloods, pump settings and CGM data; adjustment of treatment                                                                         | 2 weeks after Visit 1 (+1 week); Run-in could be repeated                                           | 1-2 hours |
| <b>Training Period</b>                  | <b>Visit 3</b>                                                                                                               | Randomisation, repeat HbA1c if Visit 3 and Visit 1 are >28 days apart, urine pregnancy test, study pump training and initiation, competency assessment | May coincide with Visit 2, within 8 weeks of Visit 1                                                | 3-4 hours |
|                                         | <b>Visit 3a</b>                                                                                                              | Real-time CGM training and initiation, competency assessment                                                                                           | Within 0 to 7 days of Visit 3 (Visit 3a may coincide with Visit 3; training visits can be repeated) | 2-4 hours |
| <b>CL + LGS Intervention (6 months)</b> | <b>Visit 4*</b>                                                                                                              | CL initiation at clinic/home: data download, CL and low glucose feature training, competency assessment, blinded CGM                                   | 4 weeks after Randomisation ( $\pm 1$ week)                                                         | 2-6 hours |
|                                         | Contact 1                                                                                                                    | Review use of study devices; study update                                                                                                              | Within 24 to 48 hours after Visit 4                                                                 | <1 hour   |
|                                         | <b>Visit 5**</b>                                                                                                             | Review use of study devices; study update                                                                                                              | 1 week after Visit 4 ( $\pm 3$ days)                                                                | <1 hour   |
|                                         | Contact 2                                                                                                                    | Review use of study devices; study update                                                                                                              | 2 weeks after Visit 4 ( $\pm 3$ days)                                                               | <1 hour   |
|                                         | Contact 3                                                                                                                    | Review use of study devices; study update                                                                                                              | 1 month after Visit 4 ( $\pm 2$ weeks)                                                              | <1 hour   |
|                                         | Contact 4                                                                                                                    | Review use of study devices; study update                                                                                                              | 2 months after Visit 4 ( $\pm 2$ weeks)                                                             | <1 hour   |
|                                         | <b>Visit 6</b>                                                                                                               | 3-month visit: HbA1c, urine pregnancy test, data download, blinded CGM, surveys                                                                        | 4 months after Randomisation ( $\pm 2$ weeks)                                                       | 1-3 hours |
|                                         | Contact 5                                                                                                                    | Review use of study devices; study update                                                                                                              | 5 months after Randomisation ( $\pm 2$ weeks)                                                       | <1 hour   |
|                                         | Contact 6                                                                                                                    | Review use of study devices; study update                                                                                                              | 6 months after Randomisation ( $\pm 2$ weeks)                                                       | <1 hour   |
|                                         | <b>Visit 7</b>                                                                                                               | Blinded CGM                                                                                                                                            | 2-4 weeks before planned Visit 8                                                                    | <0.5 hour |
| <b>Visit 8</b>                          | End of closed-loop treatment arm (6 months of CL): HbA1c, data download, surveys and focus groups; resume usual pump therapy | 7 months after Randomisation ( $\pm 2$ weeks)                                                                                                          | 1-3 hours                                                                                           |           |

\* In-person clinic visit mandatory in USA only.

1  
2  
3 \*\* Could be done via phone/e-mail in UK. In-person visit mandatory in USA only.  
4 HbA1c, glycated haemoglobin; CGM, continuous glucose monitoring; CL, closed-loop.  
5  
6  
7  
8  
9  
10  
11  
12  
13  
14  
15  
16  
17  
18  
19  
20  
21  
22  
23  
24  
25  
26  
27  
28  
29  
30  
31  
32  
33  
34  
35  
36  
37  
38  
39  
40  
41  
42  
43  
44  
45  
46  
47  
48  
49  
50  
51  
52  
53  
54  
55  
56  
57  
58  
59  
60



**Table 3.** Schedule of study visits / phone contacts when the participant is randomised to usual care (conventional or sensor-augmented insulin pump therapy) (control group)

|                                                           | Visit/<br>Contact                                                                                                                                                         | Description                                                                                                                                         | Start relative to previous /<br>next Visit / Activity        | Duration  |
|-----------------------------------------------------------|---------------------------------------------------------------------------------------------------------------------------------------------------------------------------|-----------------------------------------------------------------------------------------------------------------------------------------------------|--------------------------------------------------------------|-----------|
| <b>Run-in</b>                                             | <b>Visit 1</b>                                                                                                                                                            | Recruitment visit: consent, HbA1c, screening bloods, urine pregnancy test, baseline surveys, blinded CGM training and insertion                     |                                                              | 1-4 hours |
|                                                           | <b>Visit 2</b>                                                                                                                                                            | Review of baseline bloods, pump settings and CGM data; adjustment of treatment                                                                      | 2 weeks after Visit 1 (+1 week);<br>Run-in could be repeated | 1-2 hours |
| <b>Training period</b>                                    | <b>Visit 3</b>                                                                                                                                                            | Randomisation, repeat HbA1c if Visit 3 and Visit 1 are >28 days apart, urine pregnancy test, insulin pump refresher training, competency assessment | May coincide with Visit 2, within 8 weeks of Visit 1         | 3-4 hours |
| <b>Usual insulin pump therapy Intervention (6 months)</b> | <b>Visit 4*</b>                                                                                                                                                           | Initiation of standard therapy arm at clinic/home, glucometer download, recording of current insulin requirements, blinded CGM                      | 4 weeks after Randomisation ( $\pm 1$ week)                  | 2-6 hours |
|                                                           | Contact 1                                                                                                                                                                 | Study update                                                                                                                                        | Within 24 to 48 hours after Visit 4                          | <1 hour   |
|                                                           | <b>Visit 5**</b>                                                                                                                                                          | Study update                                                                                                                                        | 1 week after Visit 4 ( $\pm 3$ days)                         | <1 hour   |
|                                                           | Contact 2                                                                                                                                                                 | Study update                                                                                                                                        | 2 weeks after Visit 4 ( $\pm 3$ days)                        | <1 hour   |
|                                                           | Contact 3                                                                                                                                                                 | Study update                                                                                                                                        | 1 month after Visit 4 ( $\pm 2$ weeks)                       | <1 hour   |
|                                                           | Contact 4                                                                                                                                                                 | Study update                                                                                                                                        | 2 months after Visit 4 ( $\pm 2$ weeks)                      | <1 hour   |
|                                                           | <b>Visit 6</b>                                                                                                                                                            | 3-month visit: HbA1c, urine pregnancy test, glucometer download, recording of current insulin requirements, surveys, blinded CGM                    | 4 months after Randomisation ( $\pm 2$ weeks)                | 1-3 hours |
|                                                           | Contact 5                                                                                                                                                                 | Study update                                                                                                                                        | 5 months after Randomisation ( $\pm 2$ weeks)                | <1 hour   |
|                                                           | Contact 6                                                                                                                                                                 | Study update                                                                                                                                        | 6 months after Randomisation ( $\pm 2$ weeks)                | <1 hour   |
|                                                           | <b>Visit 7</b>                                                                                                                                                            | Blinded CGM                                                                                                                                         | 2-4 weeks before planned Visit 8                             | <0.5 hour |
| <b>Visit 8</b>                                            | End of standard pump therapy treatment arm (6 months): HbA1c, glucometer download, recording of current insulin requirements, surveys and focus groups, resume usual care | 7 months after Randomisation ( $\pm 2$ weeks)                                                                                                       | 1-3 hours                                                    |           |

\* In-person clinic visit mandatory in USA only.

\*\* Could be done via phone/e-mail.

HbA1c, glycated haemoglobin; CGM, continuous glucose monitoring.

1  
2  
3 **Figure Legends**  
4

5 **Figure 1** Study flow chart. HbA1c, glycated haemoglobin; CGM, continuous glucose  
6 monitoring.  
7

8 **Figure 2** FlorenceM closed-loop system prototype.  
9

10 The system consists of a continuous glucose monitoring transmitter with Guardian 3 sensor  
11 (Medtronic), an insulin pump (modified 640G pump, Medtronic), and an Android smartphone  
12 running the control algorithm (Cambridge).  
13  
14  
15  
16  
17  
18  
19  
20  
21  
22  
23  
24  
25  
26  
27  
28  
29  
30  
31  
32  
33  
34  
35  
36  
37  
38  
39  
40  
41  
42  
43  
44  
45  
46  
47  
48  
49  
50  
51  
52  
53  
54  
55  
56  
57  
58  
59  
60

## References

1. International Diabetes Federation. IDF Diabetes Atlas 2017. 8th Edition 2017 <http://www.diabetesatlas.org> (last accessed 26th July 2018).
2. Wood JR, Miller KM, Maahs DM, Beck RW, DiMeglio LA, Libman IM, et al. Most youth with type 1 diabetes in the T1D Exchange Clinic Registry do not meet American Diabetes Association or International Society for Pediatric and Adolescent Diabetes clinical guidelines. *Diabetes Care*. 2013;36(7):2035-7.
3. Diabetes Research in Children Network Study G, Buckingham B, Beck RW, Tamborlane WV, Xing D, Kollman C, et al. Continuous glucose monitoring in children with type 1 diabetes. *J Pediatr*. 2007;151(4):388-93, 93 e1-2.
4. Bode BW, Schwartz S, Stubbs HA, Block JE. Glycemic characteristics in continuously monitored patients with type 1 and type 2 diabetes: normative values. *Diabetes Care*. 2005;28(10):2361-6.
5. Cryer PE. Diverse causes of hypoglycemia-associated autonomic failure in diabetes. *N Engl J Med*. 2004;350(22):2272-9.
6. Cryer PE. Mechanisms of hypoglycemia-associated autonomic failure and its component syndromes in diabetes. *Diabetes*. 2005;54(12):3592-601.
7. Wild D, von Maltzahn R, Brohan E, Christensen T, Clauson P, Gonder-Frederick L. A critical review of the literature on fear of hypoglycemia in diabetes: Implications for diabetes management and patient education. *Patient Educ Couns*. 2007;68(1):10-5.
8. Kropff J, DeVries JH. Continuous Glucose Monitoring, Future Products, and Update on Worldwide Artificial Pancreas Projects. *Diabetes Tech Ther*. 2016;18 Suppl 2:S253-63.
9. Juvenile Diabetes Research Foundation Continuous Glucose Monitoring Study G, Tamborlane WV, Beck RW, Bode BW, Buckingham B, Chase HP, et al. Continuous glucose monitoring and intensive treatment of type 1 diabetes. *N Engl J Med*. 2008;359(14):1464-76.
10. Kordonouri O, Pankowska E, Rami B, Kapellen T, Coutant R, Hartmann R, et al. Sensor-augmented pump therapy from the diagnosis of childhood type 1 diabetes: results of the Paediatric Onset Study (ONSET) after 12 months of treatment. *Diabetologia*. 2010;53(12):2487-95.
11. Pickup JC, Freeman SC, Sutton AJ. Glycaemic control in type 1 diabetes during real time continuous glucose monitoring compared with self monitoring of blood glucose: meta-analysis of randomised controlled trials using individual patient data. *Bmj*. 2011;343:d3805.
12. Bergenstal RM, Tamborlane WV, Ahmann A, Buse JB, Dailey G, Davis SN, et al. Effectiveness of sensor-augmented insulin-pump therapy in type 1 diabetes. *N Engl J Med*. 2010;363(4):311-20.
13. Bergenstal RM, Klonoff DC, Garg SK, Bode BW, Meredith M, Slover RH, et al. Threshold-based insulin-pump interruption for reduction of hypoglycemia. *N Engl J Med*. 2013;369(3):224-32.
14. Thabit H, Hovorka R. Coming of age: the artificial pancreas for type 1 diabetes. *Diabetologia*. 2016;59(9):1795-805.
15. Hovorka R. Closed-loop insulin delivery: from bench to clinical practice. *Nat Rev Endocrinol*. 2011;7(7):385-95.
16. FDA News Release. FDA approves first automated insulin delivery device for type 1 diabetes. <http://www.fda.gov/NewsEvents/Newsroom/PressAnnouncements/ucm522974.htm> (last accessed 26 July 2018) [
17. Kropff J, Del Favero S, Place J, Toffanin C, Visentin R, Monaro M, et al. 2 month evening and night closed-loop glucose control in patients with type 1 diabetes under free-living conditions: a randomised crossover trial. *Lancet Diabetes Endocrinol*. 2015;3(12):939-47.
18. Hovorka R, Allen JM, Elleri D, Chassin LJ, Harris J, Xing D, et al. Manual closed-loop insulin delivery in children and adolescents with type 1 diabetes: a phase 2 randomised crossover trial. *Lancet*. 2010;375(9716):743-51.
19. Elleri D, Allen JM, Kumareswaran K, Leelarathna L, Nodale M, Caldwell K, et al. Closed-loop basal insulin delivery over 36 hours in adolescents with type 1 diabetes: randomized clinical trial. *Diabetes Care*. 2013;36(4):838-44.

- 1
- 2
- 3 20. Nimri R, Danne T, Kordonouri O, Atlas E, Bratina N, Biester T, et al. The "Glucositter"  
4 overnight automated closed loop system for type 1 diabetes: a randomized crossover trial.  
5 *Pediatr Diabetes*. 2013;14(3):159-67.
- 6 21. Hovorka R, Elleri D, Thabit H, Allen JM, Leelarathna L, El-Khairi R, et al. Overnight  
7 Closed Loop Insulin Delivery in Young People with Type 1 Diabetes: A Free-Living  
8 Randomised Clinical Trial. *Diabetes Care*. 2014;37(5):1204-11.
- 9 22. Thabit H, Tauschmann M, Allen JM, Leelarathna L, Hartnell S, Wilinska ME, et al.  
10 Home Use of an Artificial Beta Cell in Type 1 Diabetes. *N Engl J Med*. 2015;373(22):2129-  
11 40.
- 12 23. Nimri R, Muller I, Atlas E, Miller S, Kordonouri O, Bratina N, et al. Night glucose  
13 control with MD-Logic artificial pancreas in home setting: a single blind, randomized  
14 crossover trial-interim analysis. *Pediatr Diabetes*. 2014;15(2):91-9.
- 15 24. Tauschmann M, Allen JM, Wilinska ME, Thabit H, Stewart Z, Cheng P, et al. Day-  
16 and-Night Hybrid Closed-Loop Insulin Delivery in Adolescents With Type 1 Diabetes: A Free-  
17 Living, Randomized Clinical Trial. *Diabetes Care*. 2016;Jan 6 [Epub ahead of print].
- 18 25. Leelarathna L, Dellweg S, Mader JK, Allen JM, Benesch C, Doll W, et al. Day and  
19 night home closed-loop insulin delivery in adults with type 1 diabetes: three-center  
20 randomized crossover study. *Diabetes Care*. 2014;37(7):1931-7.
- 21 26. Thabit H, Lubina-Solomon A, Stadler M, Leelarathna L, Walkinshaw E, Pernet A, et  
22 al. Home use of closed-loop insulin delivery for overnight glucose control in adults with type 1  
23 diabetes: a 4-week, multicentre, randomised crossover study. *Lancet Diabetes Endocrinol*.  
24 2014;2(9):701-9.
- 25 27. Barnard KD, Wysocki T, Allen JM, Elleri D, Thabit H, Leelarathna L, et al. Closing the  
26 loop overnight at home setting: psychosocial impact for adolescents with type 1 diabetes and  
27 their parents. *BMJ Open Diabetes Res Care*. 2014;2(1):e000025.
- 28 28. Bekiari E, Kitsios K, Thabit H, Tauschmann M, Athanasiadou E, Karagiannis T, et al.  
29 Artificial pancreas treatment for outpatients with type 1 diabetes: systematic review and  
30 meta-analysis. *Bmj*. 2018;361:k1310.
- 31 29. Wilinska ME, Chassin LJ, Acerini CL, Allen JM, Dunger DB, Hovorka R. Simulation  
32 environment to evaluate closed-loop insulin delivery systems in type 1 diabetes. *J Diabetes  
33 Sci Technol*. 2010;4(1):132-44.
- 34 30. Boughton CK, Hovorka R. Is an artificial pancreas (closed-loop system) for Type 1  
35 diabetes effective? *Diabet Med*. 2019;36(3):279-86.
- 36 31. Stevens K. Developing a descriptive system for a new preference-based measure of  
37 health-related quality of life for children. *Qual Life Res*. 2009;18(8):1105-13.
- 38 32. Wille N, Badia X, Bonsel G, Burstrom K, Cavrini G, Devlin N, et al. Development of  
39 the EQ-5D-Y: a child-friendly version of the EQ-5D. *Qual Life Res*. 2010;19(6):875-86.
- 40 33. Effectiveness of continuous glucose monitoring in a clinical care environment:  
41 evidence from the Juvenile Diabetes Research Foundation continuous glucose monitoring  
42 (JDRF-CGM) trial. *Diabetes Care*. 2010;33(1):17-22.
- 43 34. World Health Organization. Definition, Diagnosis and Classification of Diabetes  
44 Mellitus and its Complications. Part 1: Diagnosis and Classification of Diabetes Mellitus.  
45 WHO/NCD/NCS/99.2. Geneva, (1999).
- 46
- 47
- 48
- 49
- 50
- 51
- 52
- 53
- 54
- 55
- 56
- 57
- 58
- 59
- 60

**Figure 1.** Study flow chart

**Figure 2.** FlorenceM closed-loop system prototype

The system consists of a continuous glucose monitoring transmitter with Guardian 3 sensor (Medtronic), an insulin pump (modified 640G pump, Medtronic), and an Android smartphone running the control algorithm (Cambridge).

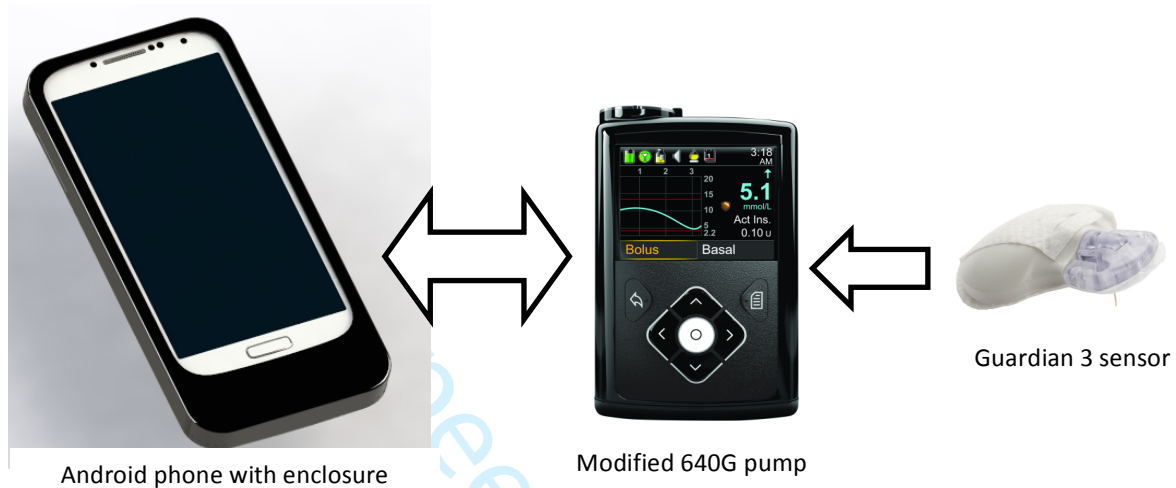

# Reporting checklist for protocol of a clinical trial.

Based on the SPIRIT guidelines.

## Instructions to authors

Complete this checklist by entering the page numbers from your manuscript where readers will find each of the items listed below.

Your article may not currently address all the items on the checklist. Please modify your text to include the missing information. If you are certain that an item does not apply, please write "n/a" and provide a short explanation.

Upload your completed checklist as an extra file when you submit to a journal.

In your methods section, say that you used the SPIRIT reporting guidelines, and cite them as:

Chan A-W, Tetzlaff JM, Altman DG, Laupacis A, Gøtzsche PC, Krleža-Jerić K, Hróbjartsson A, Mann H, Dickersin K, Berlin J, Doré C, Parulekar W, Summerskill W, Groves T, Schulz K, Sox H, Rockhold FW, Rennie D, Moher D. SPIRIT 2013 Statement: Defining standard protocol items for clinical trials. *Ann Intern Med.* 2013;158(3):200-207

|                    |                     | Reporting Item                                                                                               | Page Number |
|--------------------|---------------------|--------------------------------------------------------------------------------------------------------------|-------------|
| Title              | <a href="#">#1</a>  | Descriptive title identifying the study design, population, interventions, and, if applicable, trial acronym | 1           |
| Trial registration | <a href="#">#2a</a> | Trial identifier and registry name. If not yet registered, name of intended registry                         | 2           |

|    |                     |                     |                                                  |
|----|---------------------|---------------------|--------------------------------------------------|
| 1  |                     |                     | NCT02925299                                      |
| 2  |                     |                     |                                                  |
| 3  |                     |                     | (ClinicalTrials.gov)                             |
| 4  |                     |                     |                                                  |
| 5  |                     |                     |                                                  |
| 6  |                     |                     | DAN05                                            |
| 7  |                     |                     |                                                  |
| 8  |                     |                     |                                                  |
| 9  |                     |                     |                                                  |
| 10 | Trial registration: | <a href="#">#2b</a> | All items from the World Health Organization     |
| 11 |                     |                     |                                                  |
| 12 | data set            |                     | Trial Registration Data Set                      |
| 13 |                     |                     |                                                  |
| 14 |                     |                     |                                                  |
| 15 | Protocol version    | <a href="#">#3</a>  | Date and version identifier                      |
| 16 |                     |                     | 16.04.2018 (6.0)                                 |
| 17 |                     |                     |                                                  |
| 18 | Funding             | <a href="#">#4</a>  | Sources and types of financial, material, and    |
| 19 |                     |                     | 14                                               |
| 20 |                     |                     | other support                                    |
| 21 |                     |                     |                                                  |
| 22 |                     |                     |                                                  |
| 23 | Roles and           | <a href="#">#5a</a> | Names, affiliations, and roles of protocol       |
| 24 |                     |                     | 14                                               |
| 25 | responsibilities:   |                     | contributors                                     |
| 26 |                     |                     |                                                  |
| 27 | contributorship     |                     |                                                  |
| 28 |                     |                     |                                                  |
| 29 |                     |                     |                                                  |
| 30 |                     |                     |                                                  |
| 31 | Roles and           | <a href="#">#5b</a> | Name and contact information for the trial       |
| 32 |                     |                     | NCT02925299                                      |
| 33 | responsibilities:   |                     | (ClinicalTrials.gov)                             |
| 34 |                     |                     | sponsor                                          |
| 35 | sponsor contact     |                     |                                                  |
| 36 |                     |                     |                                                  |
| 37 | information         |                     |                                                  |
| 38 |                     |                     |                                                  |
| 39 |                     |                     |                                                  |
| 40 |                     |                     |                                                  |
| 41 | Roles and           | <a href="#">#5c</a> | Role of study sponsor and funders, if any, in    |
| 42 |                     |                     | NCT02925299                                      |
| 43 | responsibilities:   |                     | (ClinicalTrials.gov)                             |
| 44 |                     |                     | study design; collection, management,            |
| 45 | sponsor and funder  |                     | analysis, and interpretation of data; writing of |
| 46 |                     |                     | the report; and the decision to submit the       |
| 47 |                     |                     | report for publication, including whether they   |
| 48 |                     |                     | will have ultimate authority over any of these   |
| 49 |                     |                     | activities                                       |
| 50 |                     |                     |                                                  |
| 51 |                     |                     |                                                  |
| 52 |                     |                     |                                                  |
| 53 |                     |                     |                                                  |
| 54 |                     |                     |                                                  |
| 55 |                     |                     |                                                  |
| 56 |                     |                     |                                                  |
| 57 |                     |                     |                                                  |
| 58 |                     |                     |                                                  |
| 59 |                     |                     |                                                  |
| 60 |                     |                     |                                                  |



|    |                      |                     |                                                     |                   |
|----|----------------------|---------------------|-----------------------------------------------------|-------------------|
| 1  | Roles and            | <a href="#">#5d</a> | Composition, roles, and responsibilities of the     | See supplementary |
| 2  |                      |                     |                                                     |                   |
| 3  | responsibilities:    |                     | coordinating centre, steering committee,            | file              |
| 4  |                      |                     |                                                     |                   |
| 5  | committees           |                     | endpoint adjudication committee, data               |                   |
| 6  |                      |                     |                                                     |                   |
| 7  |                      |                     | management team, and other individuals or           |                   |
| 8  |                      |                     |                                                     |                   |
| 9  |                      |                     | groups overseeing the trial, if applicable (see     |                   |
| 10 |                      |                     |                                                     |                   |
| 11 |                      |                     | Item 21a for data monitoring committee)             |                   |
| 12 |                      |                     |                                                     |                   |
| 13 |                      |                     |                                                     |                   |
| 14 |                      |                     |                                                     |                   |
| 15 | Background and       | <a href="#">#6a</a> | Description of research question and                | 4                 |
| 16 |                      |                     |                                                     |                   |
| 17 | rationale            |                     | justification for undertaking the trial, including  |                   |
| 18 |                      |                     |                                                     |                   |
| 19 |                      |                     | summary of relevant studies (published and          |                   |
| 20 |                      |                     |                                                     |                   |
| 21 |                      |                     | unpublished) examining benefits and harms for       |                   |
| 22 |                      |                     |                                                     |                   |
| 23 |                      |                     | each intervention                                   |                   |
| 24 |                      |                     |                                                     |                   |
| 25 |                      |                     |                                                     |                   |
| 26 |                      |                     |                                                     |                   |
| 27 |                      |                     |                                                     |                   |
| 28 | Background and       | <a href="#">#6b</a> | Explanation for choice of comparators               | 4                 |
| 29 |                      |                     |                                                     |                   |
| 30 | rationale: choice of |                     |                                                     |                   |
| 31 |                      |                     |                                                     |                   |
| 32 | comparators          |                     |                                                     |                   |
| 33 |                      |                     |                                                     |                   |
| 34 |                      |                     |                                                     |                   |
| 35 | Objectives           | <a href="#">#7</a>  | Specific objectives or hypotheses                   | 2, 5              |
| 36 |                      |                     |                                                     |                   |
| 37 |                      |                     |                                                     |                   |
| 38 | Trial design         | <a href="#">#8</a>  | Description of trial design including type of trial | 5                 |
| 39 |                      |                     |                                                     |                   |
| 40 |                      |                     | (eg, parallel group, crossover, factorial, single   |                   |
| 41 |                      |                     |                                                     |                   |
| 42 |                      |                     | group), allocation ratio, and framework (eg,        |                   |
| 43 |                      |                     |                                                     |                   |
| 44 |                      |                     | superiority, equivalence, non-inferiority,          |                   |
| 45 |                      |                     |                                                     |                   |
| 46 |                      |                     | exploratory)                                        |                   |
| 47 |                      |                     |                                                     |                   |
| 48 |                      |                     |                                                     |                   |
| 49 |                      |                     |                                                     |                   |
| 50 |                      |                     |                                                     |                   |
| 51 | Study setting        | <a href="#">#9</a>  | Description of study settings (eg, community        | 5                 |
| 52 |                      |                     |                                                     |                   |
| 53 |                      |                     | clinic, academic hospital) and list of countries    |                   |
| 54 |                      |                     |                                                     |                   |
| 55 |                      |                     | where data will be collected. Reference to          |                   |
| 56 |                      |                     |                                                     |                   |
| 57 |                      |                     | where list of study sites can be obtained           |                   |
| 58 |                      |                     |                                                     |                   |
| 59 |                      |                     |                                                     |                   |
| 60 |                      |                     |                                                     |                   |

|    |                      |                      |                                                       |              |
|----|----------------------|----------------------|-------------------------------------------------------|--------------|
| 1  | Eligibility criteria | <a href="#">#10</a>  | Inclusion and exclusion criteria for participants.    | 15           |
| 2  |                      |                      |                                                       |              |
| 3  |                      |                      | If applicable, eligibility criteria for study centres |              |
| 4  |                      |                      | and individuals who will perform the                  |              |
| 5  |                      |                      | interventions (eg, surgeons, psychotherapists)        |              |
| 6  |                      |                      |                                                       |              |
| 7  |                      |                      |                                                       |              |
| 8  |                      |                      |                                                       |              |
| 9  |                      |                      |                                                       |              |
| 10 |                      |                      |                                                       |              |
| 11 | Interventions:       | <a href="#">#11a</a> | Interventions for each group with sufficient          | 5, 16, 17    |
| 12 |                      |                      |                                                       |              |
| 13 | description          |                      | detail to allow replication, including how and        |              |
| 14 |                      |                      | when they will be administered                        |              |
| 15 |                      |                      |                                                       |              |
| 16 |                      |                      |                                                       |              |
| 17 |                      |                      |                                                       |              |
| 18 |                      |                      |                                                       |              |
| 19 | Interventions:       | <a href="#">#11b</a> | Criteria for discontinuing or modifying allocated     | See protocol |
| 20 |                      |                      | interventions for a given trial participant (eg,      |              |
| 21 | modifications        |                      | drug dose change in response to harms,                |              |
| 22 |                      |                      | participant request, or improving / worsening         |              |
| 23 |                      |                      | disease)                                              |              |
| 24 |                      |                      |                                                       |              |
| 25 |                      |                      |                                                       |              |
| 26 |                      |                      |                                                       |              |
| 27 |                      |                      |                                                       |              |
| 28 |                      |                      |                                                       |              |
| 29 |                      |                      |                                                       |              |
| 30 |                      |                      |                                                       |              |
| 31 | Interventions:       | <a href="#">#11c</a> | Strategies to improve adherence to                    | N/A          |
| 32 |                      |                      |                                                       |              |
| 33 | adherence            |                      | intervention protocols, and any procedures for        |              |
| 34 |                      |                      | monitoring adherence (eg, drug tablet return;         |              |
| 35 |                      |                      | laboratory tests)                                     |              |
| 36 |                      |                      |                                                       |              |
| 37 |                      |                      |                                                       |              |
| 38 |                      |                      |                                                       |              |
| 39 |                      |                      |                                                       |              |
| 40 |                      |                      |                                                       |              |
| 41 | Interventions:       | <a href="#">#11d</a> | Relevant concomitant care and interventions           | 7            |
| 42 |                      |                      |                                                       |              |
| 43 | concomitant care     |                      | that are permitted or prohibited during the trial     |              |
| 44 |                      |                      |                                                       |              |
| 45 |                      |                      |                                                       |              |
| 46 | Outcomes             | <a href="#">#12</a>  | Primary, secondary, and other outcomes,               | 9, 10        |
| 47 |                      |                      | including the specific measurement variable           |              |
| 48 |                      |                      | (eg, systolic blood pressure), analysis metric        |              |
| 49 |                      |                      | (eg, change from baseline, final value, time to       |              |
| 50 |                      |                      | event), method of aggregation (eg, median,            |              |
| 51 |                      |                      | proportion), and time point for each outcome.         |              |
| 52 |                      |                      |                                                       |              |
| 53 |                      |                      |                                                       |              |
| 54 |                      |                      |                                                       |              |
| 55 |                      |                      |                                                       |              |
| 56 |                      |                      |                                                       |              |
| 57 |                      |                      |                                                       |              |
| 58 |                      |                      |                                                       |              |
| 59 |                      |                      |                                                       |              |
| 60 |                      |                      |                                                       |              |

|    |                      |                                                                   |              |
|----|----------------------|-------------------------------------------------------------------|--------------|
| 1  |                      | Explanation of the clinical relevance of chosen                   |              |
| 2  |                      | efficacy and harm outcomes is strongly                            |              |
| 3  |                      | recommended                                                       |              |
| 4  |                      |                                                                   |              |
| 5  |                      |                                                                   |              |
| 6  |                      |                                                                   |              |
| 7  |                      |                                                                   |              |
| 8  | Participant timeline | <a href="#">#13</a> Time schedule of enrolment, interventions     | See Figure 1 |
| 9  |                      | (including any run-ins and washouts),                             |              |
| 10 |                      | assessments, and visits for participants. A                       |              |
| 11 |                      | schematic diagram is highly recommended                           |              |
| 12 |                      | (see Figure)                                                      |              |
| 13 |                      |                                                                   |              |
| 14 |                      |                                                                   |              |
| 15 |                      |                                                                   |              |
| 16 |                      |                                                                   |              |
| 17 |                      |                                                                   |              |
| 18 |                      |                                                                   |              |
| 19 |                      |                                                                   |              |
| 20 | Sample size          | <a href="#">#14</a> Estimated number of participants needed to    | 12           |
| 21 |                      | achieve study objectives and how it was                           |              |
| 22 |                      | determined, including clinical and statistical                    |              |
| 23 |                      | assumptions supporting any sample size                            |              |
| 24 |                      | calculations                                                      |              |
| 25 |                      |                                                                   |              |
| 26 |                      |                                                                   |              |
| 27 |                      |                                                                   |              |
| 28 |                      |                                                                   |              |
| 29 |                      |                                                                   |              |
| 30 |                      |                                                                   |              |
| 31 |                      |                                                                   |              |
| 32 | Recruitment          | <a href="#">#15</a> Strategies for achieving adequate participant | 5            |
| 33 |                      | enrolment to reach target sample size                             |              |
| 34 |                      |                                                                   |              |
| 35 |                      |                                                                   |              |
| 36 |                      |                                                                   |              |
| 37 |                      |                                                                   |              |
| 38 | Allocation:          | <a href="#">#16a</a> Method of generating the allocation sequence | 6            |
| 39 | sequence             | (eg, computer-generated random numbers),                          |              |
| 40 |                      | and list of any factors for stratification. To                    |              |
| 41 |                      | reduce predictability of a random sequence,                       |              |
| 42 | generation           | details of any planned restriction (eg, blocking)                 |              |
| 43 |                      | should be provided in a separate document                         |              |
| 44 |                      | that is unavailable to those who enrol                            |              |
| 45 |                      | participants or assign interventions                              |              |
| 46 |                      |                                                                   |              |
| 47 |                      |                                                                   |              |
| 48 |                      |                                                                   |              |
| 49 |                      |                                                                   |              |
| 50 |                      |                                                                   |              |
| 51 |                      |                                                                   |              |
| 52 |                      |                                                                   |              |
| 53 |                      |                                                                   |              |
| 54 |                      |                                                                   |              |
| 55 |                      |                                                                   |              |
| 56 |                      |                                                                   |              |
| 57 |                      |                                                                   |              |
| 58 |                      |                                                                   |              |
| 59 |                      |                                                                   |              |
| 60 |                      |                                                                   |              |

|    |                     |                      |                                                    |              |
|----|---------------------|----------------------|----------------------------------------------------|--------------|
| 1  | Allocation          | <a href="#">#16b</a> | Mechanism of implementing the allocation           | 6            |
| 2  |                     |                      |                                                    |              |
| 3  | concealment         |                      | sequence (eg, central telephone; sequentially      |              |
| 4  |                     |                      | numbered, opaque, sealed envelopes),               |              |
| 5  | mechanism           |                      | describing any steps to conceal the sequence       |              |
| 6  |                     |                      | until interventions are assigned                   |              |
| 7  |                     |                      |                                                    |              |
| 8  |                     |                      |                                                    |              |
| 9  |                     |                      |                                                    |              |
| 10 |                     |                      |                                                    |              |
| 11 |                     |                      |                                                    |              |
| 12 |                     |                      |                                                    |              |
| 13 | Allocation:         | <a href="#">#16c</a> | Who will generate the allocation sequence,         |              |
| 14 |                     |                      | who will enrol participants, and who will assign   |              |
| 15 | implementation      |                      | participants to interventions                      |              |
| 16 |                     |                      |                                                    |              |
| 17 |                     |                      |                                                    |              |
| 18 |                     |                      |                                                    |              |
| 19 |                     |                      |                                                    |              |
| 20 |                     |                      |                                                    |              |
| 21 | Blinding (masking)  | <a href="#">#17a</a> | Who will be blinded after assignment to            | N/A          |
| 22 |                     |                      | interventions (eg, trial participants, care        |              |
| 23 |                     |                      | providers, outcome assessors, data analysts),      |              |
| 24 |                     |                      | and how                                            |              |
| 25 |                     |                      |                                                    |              |
| 26 |                     |                      |                                                    |              |
| 27 |                     |                      |                                                    |              |
| 28 |                     |                      |                                                    |              |
| 29 |                     |                      |                                                    |              |
| 30 |                     |                      |                                                    |              |
| 31 | Blinding (masking): | <a href="#">#17b</a> | If blinded, circumstances under which              | N/A          |
| 32 |                     |                      | unblinding is permissible, and procedure for       |              |
| 33 | emergency           |                      | revealing a participant's allocated intervention   |              |
| 34 |                     |                      | during the trial                                   |              |
| 35 | unblinding          |                      |                                                    |              |
| 36 |                     |                      |                                                    |              |
| 37 |                     |                      |                                                    |              |
| 38 |                     |                      |                                                    |              |
| 39 |                     |                      |                                                    |              |
| 40 |                     |                      |                                                    |              |
| 41 | Data collection     | <a href="#">#18a</a> | Plans for assessment and collection of             | See protocol |
| 42 |                     |                      | outcome, baseline, and other trial data,           |              |
| 43 | plan                |                      | including any related processes to promote         |              |
| 44 |                     |                      | data quality (eg, duplicate measurements,          |              |
| 45 |                     |                      | training of assessors) and a description of        |              |
| 46 |                     |                      | study instruments (eg, questionnaires,             |              |
| 47 |                     |                      | laboratory tests) along with their reliability and |              |
| 48 |                     |                      | validity, if known. Reference to where data        |              |
| 49 |                     |                      |                                                    |              |
| 50 |                     |                      |                                                    |              |
| 51 |                     |                      |                                                    |              |
| 52 |                     |                      |                                                    |              |
| 53 |                     |                      |                                                    |              |
| 54 |                     |                      |                                                    |              |
| 55 |                     |                      |                                                    |              |
| 56 |                     |                      |                                                    |              |
| 57 |                     |                      |                                                    |              |
| 58 |                     |                      |                                                    |              |
| 59 |                     |                      |                                                    |              |
| 60 |                     |                      |                                                    |              |

|    |                      |                                                                    |              |
|----|----------------------|--------------------------------------------------------------------|--------------|
| 1  |                      | collection forms can be found, if not in the                       |              |
| 2  |                      |                                                                    |              |
| 3  |                      | protocol                                                           |              |
| 4  |                      |                                                                    |              |
| 5  |                      |                                                                    |              |
| 6  | Data collection      | <a href="#">#18b</a> Plans to promote participant retention and    | See protocol |
| 7  |                      |                                                                    |              |
| 8  | plan: retention      | complete follow-up, including list of any                          |              |
| 9  |                      |                                                                    |              |
| 10 |                      | outcome data to be collected for participants                      |              |
| 11 |                      |                                                                    |              |
| 12 |                      | who discontinue or deviate from intervention                       |              |
| 13 |                      |                                                                    |              |
| 14 |                      | protocols                                                          |              |
| 15 |                      |                                                                    |              |
| 16 |                      |                                                                    |              |
| 17 |                      |                                                                    |              |
| 18 | Data management      | <a href="#">#19</a> Plans for data entry, coding, security, and    | 12           |
| 19 |                      |                                                                    |              |
| 20 |                      | storage, including any related processes to                        |              |
| 21 |                      |                                                                    |              |
| 22 |                      | promote data quality (eg, double data entry;                       |              |
| 23 |                      |                                                                    |              |
| 24 |                      | range checks for data values). Reference to                        |              |
| 25 |                      |                                                                    |              |
| 26 |                      | where details of data management procedures                        |              |
| 27 |                      |                                                                    |              |
| 28 |                      | can be found, if not in the protocol                               |              |
| 29 |                      |                                                                    |              |
| 30 |                      |                                                                    |              |
| 31 |                      |                                                                    |              |
| 32 | Statistics:          | <a href="#">#20a</a> Statistical methods for analysing primary and | 9            |
| 33 |                      |                                                                    |              |
| 34 | outcomes             | secondary outcomes. Reference to where                             |              |
| 35 |                      |                                                                    |              |
| 36 |                      | other details of the statistical analysis plan can                 |              |
| 37 |                      |                                                                    |              |
| 38 |                      | be found, if not in the protocol                                   |              |
| 39 |                      |                                                                    |              |
| 40 |                      |                                                                    |              |
| 41 |                      |                                                                    |              |
| 42 | Statistics:          | <a href="#">#20b</a> Methods for any additional analyses (eg,      | 11           |
| 43 |                      |                                                                    |              |
| 44 | additional analyses  | subgroup and adjusted analyses)                                    |              |
| 45 |                      |                                                                    |              |
| 46 |                      |                                                                    |              |
| 47 |                      |                                                                    |              |
| 48 | Statistics: analysis | <a href="#">#20c</a> Definition of analysis population relating to | 11           |
| 49 |                      |                                                                    |              |
| 50 | population and       | protocol non-adherence (eg, as randomised                          |              |
| 51 |                      |                                                                    |              |
| 52 | missing data         | analysis), and any statistical methods to handle                   |              |
| 53 |                      |                                                                    |              |
| 54 |                      | missing data (eg, multiple imputation)                             |              |
| 55 |                      |                                                                    |              |
| 56 |                      |                                                                    |              |
| 57 |                      |                                                                    |              |
| 58 |                      |                                                                    |              |
| 59 |                      |                                                                    |              |
| 60 |                      |                                                                    |              |

|    |                  |                      |                                                     |       |
|----|------------------|----------------------|-----------------------------------------------------|-------|
| 1  | Data monitoring: | <a href="#">#21a</a> | Composition of data monitoring committee            | 12    |
| 2  |                  |                      |                                                     |       |
| 3  | formal committee |                      | (DMC); summary of its role and reporting            |       |
| 4  |                  |                      | structure; statement of whether it is               |       |
| 5  |                  |                      | independent from the sponsor and competing          |       |
| 6  |                  |                      | interests; and reference to where further details   |       |
| 7  |                  |                      | about its charter can be found, if not in the       |       |
| 8  |                  |                      | protocol. Alternatively, an explanation of why a    |       |
| 9  |                  |                      | DMC is not needed                                   |       |
| 10 |                  |                      |                                                     |       |
| 11 | Data monitoring: | <a href="#">#21b</a> | Description of any interim analyses and             | 11    |
| 12 |                  |                      |                                                     |       |
| 13 | interim analysis |                      | stopping guidelines, including who will have        |       |
| 14 |                  |                      | access to these interim results and make the        |       |
| 15 |                  |                      | final decision to terminate the trial               |       |
| 16 |                  |                      |                                                     |       |
| 17 | Harms            | <a href="#">#22</a>  | Plans for collecting, assessing, reporting, and     | 12-13 |
| 18 |                  |                      | managing solicited and spontaneously reported       |       |
| 19 |                  |                      | adverse events and other unintended effects of      |       |
| 20 |                  |                      | trial interventions or trial conduct                |       |
| 21 |                  |                      |                                                     |       |
| 22 | Auditing         | <a href="#">#23</a>  | Frequency and procedures for auditing trial         | 12    |
| 23 |                  |                      | conduct, if any, and whether the process will       |       |
| 24 |                  |                      | be independent from investigators and the           |       |
| 25 |                  |                      | sponsor                                             |       |
| 26 |                  |                      |                                                     |       |
| 27 | Research ethics  | <a href="#">#24</a>  | Plans for seeking research ethics committee /       | 13    |
| 28 |                  |                      | institutional review board (REC / IRB) approval     |       |
| 29 | approval         |                      |                                                     |       |
| 30 |                  |                      |                                                     |       |
| 31 | Protocol         | <a href="#">#25</a>  | Plans for communicating important protocol          | 13    |
| 32 |                  |                      |                                                     |       |
| 33 | amendments       |                      | modifications (eg, changes to eligibility criteria, |       |
| 34 |                  |                      |                                                     |       |

1 outcomes, analyses) to relevant parties (eg,  
 2 investigators, REC / IRBs, trial participants,  
 3 trial registries, journals, regulators)  
 4  
 5  
 6  
 7

|    |                    |                      |                                                     |     |
|----|--------------------|----------------------|-----------------------------------------------------|-----|
| 8  | Consent or assent  | <a href="#">#26a</a> | Who will obtain informed consent or assent          | 5   |
| 9  |                    |                      | from potential trial participants or authorised     |     |
| 10 |                    |                      | surrogates, and how (see Item 32)                   |     |
| 11 |                    |                      |                                                     |     |
| 12 |                    |                      |                                                     |     |
| 13 |                    |                      |                                                     |     |
| 14 |                    |                      |                                                     |     |
| 15 | Consent or assent: | <a href="#">#26b</a> | Additional consent provisions for collection and    | N/A |
| 16 | ancillary studies  |                      | use of participant data and biological              |     |
| 17 |                    |                      | specimens in ancillary studies, if applicable       |     |
| 18 |                    |                      |                                                     |     |
| 19 |                    |                      |                                                     |     |
| 20 |                    |                      |                                                     |     |
| 21 |                    |                      |                                                     |     |
| 22 |                    |                      |                                                     |     |
| 23 | Confidentiality    | <a href="#">#27</a>  | How personal information about potential and        | 12  |
| 24 |                    |                      | enrolled participants will be collected, shared,    |     |
| 25 |                    |                      | and maintained in order to protect                  |     |
| 26 |                    |                      | confidentiality before, during, and after the trial |     |
| 27 |                    |                      |                                                     |     |
| 28 |                    |                      |                                                     |     |
| 29 |                    |                      |                                                     |     |
| 30 |                    |                      |                                                     |     |
| 31 |                    |                      |                                                     |     |
| 32 |                    |                      |                                                     |     |
| 33 | Declaration of     | <a href="#">#28</a>  | Financial and other competing interests for         | 14  |
| 34 | interests          |                      | principal investigators for the overall trial and   |     |
| 35 |                    |                      | each study site                                     |     |
| 36 |                    |                      |                                                     |     |
| 37 |                    |                      |                                                     |     |
| 38 |                    |                      |                                                     |     |
| 39 |                    |                      |                                                     |     |
| 40 |                    |                      |                                                     |     |
| 41 | Data access        | <a href="#">#29</a>  | Statement of who will have access to the final      | 12  |
| 42 |                    |                      | trial dataset, and disclosure of contractual        |     |
| 43 |                    |                      | agreements that limit such access for               |     |
| 44 |                    |                      | investigators                                       |     |
| 45 |                    |                      |                                                     |     |
| 46 |                    |                      |                                                     |     |
| 47 |                    |                      |                                                     |     |
| 48 |                    |                      |                                                     |     |
| 49 |                    |                      |                                                     |     |
| 50 |                    |                      |                                                     |     |
| 51 | Ancillary and post | <a href="#">#30</a>  | Provisions, if any, for ancillary and post-trial    | N/A |
| 52 | trial care         |                      | care, and for compensation to those who suffer      |     |
| 53 |                    |                      | harm from trial participation                       |     |
| 54 |                    |                      |                                                     |     |
| 55 |                    |                      |                                                     |     |
| 56 |                    |                      |                                                     |     |
| 57 |                    |                      |                                                     |     |
| 58 |                    |                      |                                                     |     |
| 59 |                    |                      |                                                     |     |
| 60 |                    |                      |                                                     |     |

|    |                       |                      |                                                  |                   |
|----|-----------------------|----------------------|--------------------------------------------------|-------------------|
| 1  | Dissemination         | <a href="#">#31a</a> | Plans for investigators and sponsor to           | 9, 13             |
| 2  |                       |                      |                                                  |                   |
| 3  | policy: trial results |                      | communicate trial results to participants,       |                   |
| 4  |                       |                      | healthcare professionals, the public, and other  |                   |
| 5  |                       |                      | relevant groups (eg, via publication, reporting  |                   |
| 6  |                       |                      | in results databases, or other data sharing      |                   |
| 7  |                       |                      | arrangements), including any publication         |                   |
| 8  |                       |                      | restrictions                                     |                   |
| 9  |                       |                      |                                                  |                   |
| 10 |                       |                      |                                                  |                   |
| 11 | Dissemination         | <a href="#">#31b</a> | Authorship eligibility guidelines and any        | See supplementary |
| 12 |                       |                      | intended use of professional writers             | file              |
| 13 | policy: authorship    |                      |                                                  |                   |
| 14 |                       |                      |                                                  |                   |
| 15 | Dissemination         | <a href="#">#31c</a> | Plans, if any, for granting public access to the |                   |
| 16 |                       |                      | full protocol, participant-level dataset, and    |                   |
| 17 | policy: reproducible  |                      | statistical code                                 |                   |
| 18 | research              |                      |                                                  |                   |
| 19 |                       |                      |                                                  |                   |
| 20 | Informed consent      | <a href="#">#32</a>  | Model consent form and other related             | Approved consents |
| 21 |                       |                      | documentation given to participants and          | for UK and USA    |
| 22 | materials             |                      | authorised surrogates                            | available         |
| 23 |                       |                      |                                                  |                   |
| 24 | Biological            | <a href="#">#33</a>  | Plans for collection, laboratory evaluation, and | 8                 |
| 25 |                       |                      | storage of biological specimens for genetic or   |                   |
| 26 | specimens             |                      | molecular analysis in the current trial and for  |                   |
| 27 |                       |                      | future use in ancillary studies, if applicable   |                   |
| 28 |                       |                      |                                                  |                   |

29  
30  
31  
32  
33  
34  
35  
36  
37  
38  
39  
40  
41  
42  
43  
44  
45  
46  
47  
48  
49  
50  
51  
52  
53  
54  
55  
56  
57  
58  
59  
60

The SPIRIT checklist is distributed under the terms of the Creative Commons Attribution License CC-BY-ND 3.0. This checklist can be completed online using <https://www.goodreports.org/>, a tool made by the [EQUATOR Network](#) in collaboration with [Penelope.ai](#)
